# Supplementary material for: 品川区旗の台でのコミュニティ・ゾーンの形成について (特集 歩行・自転車と道路利用環境) -- (地方自治体における歩行者・自転車道路の整備と将来展望)
Source: Royal Society of Chemistry journal article supplement (doi:10.1039/d3cc05703h), 1999-04-01

## Supporting Information

# Facile Synthesis of Dibenzothiophene S-Oxides from Sulfinat Esters

Yukiko Kumagai,<sup>a</sup> Akihiro Kobayashi,<sup>a,b</sup> Keisuke Nakamura,<sup>a</sup> and Suguru Yoshida<sup>\*a</sup>

<sup>a</sup>*Department of Biological Science and Technology, Faculty of Advanced Engineering,  
Tokyo University of Science, 6-3-1 Nijuku, Katsushika-ku Tokyo 125-8585*

<sup>b</sup>*Laboratory of Chemical Bioscience, Institute of Biomaterials and Bioengineering,  
Tokyo Medical and Dental University (TMDU),  
2-3-10 Kanda-Surugadai, Chiyoda-ku, Tokyo 101-0062, Japan*

### Contents

|                                                                  |            |
|------------------------------------------------------------------|------------|
| <b>General Information</b>                                       | <b>S1</b>  |
| <b>Structures of Sulfinat Esters 1 and Arylboronic Acids 2</b>   | <b>S2</b>  |
| <b>Experimental Procedures</b>                                   | <b>S3</b>  |
| <b>Characterization Data of New Compounds</b>                    | <b>S10</b> |
| <b>References for Supporting Information</b>                     | <b>S21</b> |
| <b><sup>1</sup>H and <sup>13</sup>C NMR Spectra of Compounds</b> | <b>S22</b> |

### General Information

All reactions were performed with dry glassware under atmosphere of argon, unless otherwise noted. Analytical thin-layer chromatography (TLC) was performed on precoated (0.25 mm) silica-gel plates (Merck Chemicals, Silica Gel 60 F254, Cat. No. 1.05715). Column chromatography was conducted using silica-gel (Kanto Chemical Co., Inc., Silica Gel 60N, spherical neutral, particle size 40–50 μm, Cat. No. 37562-85 or particle size 63–210 μm, Cat. No. 37565-85). Preparative TLC (PTLC) was performed on silica gel (Wako Pure Chemical Industries Ltd., Wakogel B-5F, Cat. No. 230-00043). Melting points (Mp) were measured on an OptiMelt MPA100 (Stanford Research Systems), and are uncorrected. <sup>1</sup>H NMR spectra were obtained with a Bruker AVANCE 400 spectrometer at 400 MHz. <sup>13</sup>C NMR spectra were obtained with a Bruker AVANCE 400 spectrometer at 101 MHz. <sup>19</sup>F NMR spectra were obtained with a Bruker AVANCE 400 spectrometer at 376 MHz. All NMR measurements were carried out at 25 °C. CDCl<sub>3</sub> (Kanto Chemical Co. Inc., Cat. No. 07663-23) was used as a solvent for obtaining NMR spectra. Chemical shifts (δ) are given in parts per million (ppm) downfield from the solvent peak (δ 7.26 for <sup>1</sup>H NMR in CDCl<sub>3</sub>, δ 77.0 for <sup>13</sup>C NMR in CDCl<sub>3</sub>) as an internal reference with coupling constants (*J*) in hertz (Hz). The abbreviations s, d, t, q, and m signify singlet, doublet, triplet, quartet, and multiplet, respectively. High-resolution mass spectra (HRMS) were measured on a JEOL JMS-T100CS “AccuTOF CS” mass spectrometer under positive electrospray ionization (ESI<sup>+</sup>) conditions or JMS-700 (JEOL, Tokyo, Japan) mass spectrometer under electron impact ionization (EI) conditions.

Unless otherwise noted, materials obtained from commercial suppliers were used without further purification. Methyl 2-bromobenzenesulfinate (**1a**),<sup>S1</sup> methyl 2-bromo-4-methylbenzenesulfinate (**1b**),<sup>S2</sup> methyl 2-bromo-4,6-dimethylbenzenesulfinate (**1c**),<sup>S2</sup> methyl 6-bromobenzo[*d*][1,3]dioxole-5-sulfinate (**1d**),<sup>S2</sup> methyl 2-bromo-4-chlorobenzenesulfinate (**1e**),<sup>S2</sup> methyl 2-bromo-4-(trifluoromethyl)benzenesulfinate (**1f**),<sup>S2</sup> and 3-methoxy-5-(4,4,5,5-tetramethyl-1,3,2-dioxaborolan-2-yl)-2-(trimethylsilyl)phenyl trifluoromethanesulfonate (**2l**)<sup>S3</sup> were prepared according to reported methods. According to the procedure for the preparation of methyl 2-bromobenzenesulfinate (**1a**),<sup>S1</sup> ethyl 3-bromo-4-(methoxysulfinyl)benzoate (**1r**) was prepared from ethyl 3-bromo-4-iodobenzoate.

## Structures of Sulfinates 1 and Arylboronic Acids 2

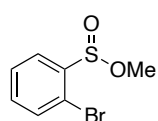

1a

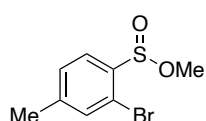

1b

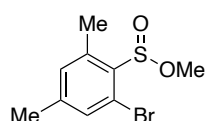

1c

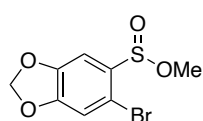

1d

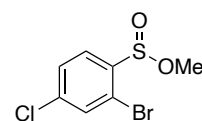

1e

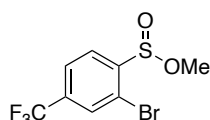

1f

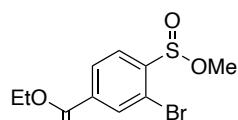

1g

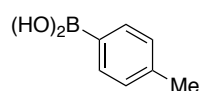

2a

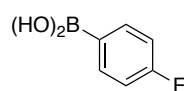

2b

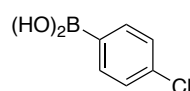

2c

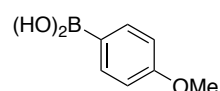

2d

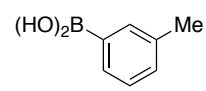

2e

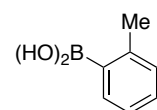

2f

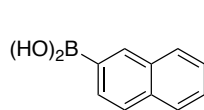

2g

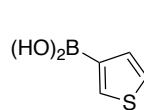

2h

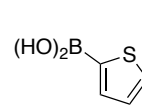

2i

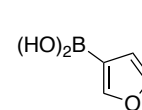

2j

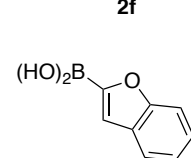

2k

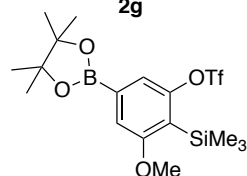

2l

## Experimental Procedures

A typical procedure for the synthesis of biarylsulfinate esters from arylsulfinate esters with arylboronic acids

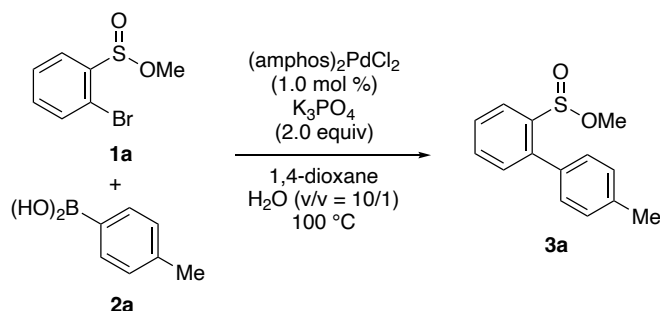

To a mixture of methyl 2-bromobenzenesulfinate (**1a**) (1.17 g, 4.98 mmol) and *p*-tolylboronic acid (**2a**) (1.02 g, 7.50 mmol, 1.5 equiv) in 1,4-dioxane (20 mL) and water (2.0 mL) were added potassium phosphate (2.12 g, 10.0 mmol, 2.0 equiv) and (amphos)<sub>2</sub>PdCl<sub>2</sub> (35.4 mg, 50.0 μmol, 1.0 mol %) at room temperature. After stirring at 100 °C (oil bath) for 5 h, the mixture was added to water (10 mL). The reaction mixture was extracted with CH<sub>2</sub>Cl<sub>2</sub> (20 mL × 3). The combined organic extract was washed with brine (5 mL). The extract was then dried with Na<sub>2</sub>SO<sub>4</sub>. After filtration, the filtrate was concentrated under reduced pressure. The residue was purified by flash column chromatography (silica-gel 60 g, *n*-hexane/EtOAc = 4/1) to give methyl 4'-methyl-[1,1'-biphenyl]-2-sulfinate (**3a**) (1.22 g, 4.96 mmol, 99%) as a black solid.

According to the procedure for preparing 4'-methyl-[1,1'-biphenyl]-2-sulfinate (**3a**), methyl 4'-fluoro-[1,1'-biphenyl]-2-sulfinate (**3b**), methyl 4'-chloro-[1,1'-biphenyl]-2-sulfinate (**3c**), methyl 4'-methoxy-[1,1'-biphenyl]-2-sulfinate (**3d**), methyl 3'-methyl-[1,1'-biphenyl]-2-sulfinate (**3e**), methyl 2'-methyl-[1,1'-biphenyl]-2-sulfinate (**3f**), methyl 2-(naphthalen-2-yl)benzenesulfinate (**3g**), methyl 2-(thiophen-3-yl)benzenesulfinate (**3h**), methyl 2-(thiophen-2-yl)benzenesulfinate (**3i**), methyl 2-(furan-3-yl)benzenesulfinate (**3j**), methyl 2-(benzofuran-2-yl)benzenesulfinate (**3k**), methyl 4',5-dimethyl-[1,1'-biphenyl]-2-sulfinate (**3l**), methyl 3,4',5-trimethyl-[1,1'-biphenyl]-2-sulfinate (**3m**), methyl 6-(*p*-tolyl)benzo[*d*][1,3]dioxole-5-sulfinate (**3n**), methyl 5-chloro-4'-methyl-[1,1'-biphenyl]-2-sulfinate (**3o**), methyl 4'-methyl-5-(trifluoromethyl)-[1,1'-biphenyl]-2-sulfinate (**3p**), ethyl 6-(methoxysulfinyl)-4'-methyl-[1,1'-biphenyl]-3-carboxylate (**3q**), methyl (*E*)-2-styrylbenzenesulfinate (**3r**), and methyl 2-(5-methoxy-3-(triflyloxy)-4-(trimethylsilyl)phenyl)benzenesulfinate (**3s**) were prepared from the corresponding sulfinate esters and boronic acid derivatives.

A typical procedure for the synthesis of dibenzothiophene *S*-oxides from biaryl sulfinate esters

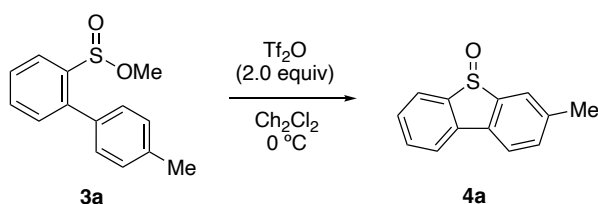

To a solution of methyl 4'-methyl-[1,1'-biphenyl]-2-sulfinate (**3a**) (49.7 mg, 0.202 mmol) in dichloromethane (2.0 mL) was added trifluoromethanesulfonic anhydride (67.2 μL, 0.400 mmol, 2.0 equiv) at 0 °C. After stirring for 1 h at the same temperature, to the mixture was added an aqueous saturated solution of sodium bicarbonate (3 mL). The mixture was extracted with dichloromethane (15 mL × 3). The combined organic extract was washed with brine (20 mL). The extract was dried with Na<sub>2</sub>SO<sub>4</sub>. After filtration, the filtrate was concentrated under reduced pressure. The residue was purified by preparative TLC (*n*-hexane/EtOAc = 2/1) to give 3-methyldibenzo[*b,d*]thiophene 5-oxide (**4a**) (41.4 mg, 0.193 mmol, 97%) as a colorless solid.

According to the procedure for preparing 3-fluorodibenzo[*b,d*]thiophene 5-oxide (**4b**), 3-chlorodibenzo[*b,d*]thiophene 5-oxide (**4c**), 2-methyldibenzo[*b,d*]thiophene 5-oxide (**4e**) (with 4-methyldibenzo[*b,d*]thiophene 5-oxide (**4e'**)), 1-methyldibenzo[*b,d*]thiophene 5-oxide (**4f**), benzo[*b*]naphtho[2,1-*d*]thiophene 11-oxide (**4g**), benzo[*b*]thieno[3,2-*d*]thiophene 8-oxide (**4h**), 2,7-dimethyldibenzo[*b,d*]thiophene 5-oxide (**4i**), 2,4,7-trimethyldibenzo[*b,d*]thiophene 5-oxide (**4m**), 2-chloro-7-methyldibenzo[*b,d*]thiophene 5-oxide (**4o**), 7-methyl-2-(trifluoromethyl)dibenzo[*b,d*]thiophene 5-oxide (**4p**), 2-(ethoxycarbonyl)-7-

methyl dibenzo[*b,d*]thiophene 5-oxide (**4q**), 2-methoxy-4-(triflyloxy)-3-(trimethylsilyl)dibenzo[*b,d*]thiophene 5-oxide (**4r**), and 2-phenylbenzo[*b*]thiophene 1-oxide (**6**) were prepared from the corresponding sulfinate ester derivatives **3**.

*Gram-scale synthesis of dibenzothiophene S-oxide (4a)*

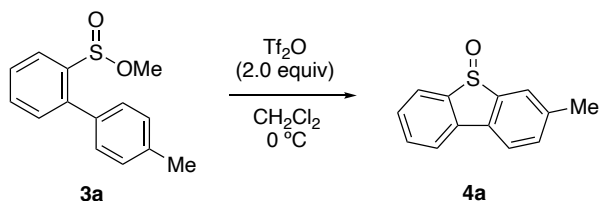

To a mixture of methyl 4'-methyl-[1,1'-biphenyl]-2-sulfinate (**3a**) (1.00 g, 4.34 mmol) in dichloromethane (43.4 mL) was added trifluoromethanesulfonic anhydride (1.46 mL, 8.68 mmol, 2.0 equiv) at  $0\text{ }^\circ\text{C}$ . After stirring for 1 h at the same temperature, to the mixture was added an aqueous saturated solution of sodium bicarbonate (50 mL). The mixture was extracted with dichloromethane ( $30\text{ mL} \times 3$ ). The combined organic extract was washed with brine (20 mL). The extract was dried with  $\text{Na}_2\text{SO}_4$ . After filtration, the filtrate was concentrated under reduced pressure. The residue was purified by column chromatography (silica-gel 25 g, *n*-hexane/EtOAc = 2/1) to give 3-methyldibenzo[*b,d*]thiophene 5-oxide (**4a**) (778.1 mg, 3.63 mmol, 83%) as a colorless solid.

*A typical procedure for the synthesis of dibenzothiophene S-oxides in diethyl ether*

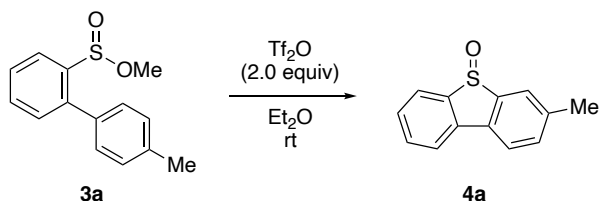

To a mixture of methyl 4'-methyl-[1,1'-biphenyl]-2-sulfinate (**3a**) (50.0 mg, 0.203 mmol) in diethyl ether (2.0 mL) was added trifluoromethanesulfonic anhydride (67.2  $\mu\text{L}$ , 0.400 mmol, 2.0 equiv) at room temperature. After stirring for 1 h at the same temperature, to the mixture was added an aqueous saturated solution of sodium bicarbonate (3 mL) and the mixture was extracted with dichloromethane ( $15\text{ mL} \times 3$ ). The combined organic extract was washed with brine (20 mL). The extract was dried with  $\text{Na}_2\text{SO}_4$ . After filtration, the filtrate was concentrated under reduced pressure. The residue was purified by preparative TLC (*n*-hexane/EtOAc = 2/1) to give 3-methyldibenzo[*b,d*]thiophene 5-oxide (**4a**) (41.8 mg, 0.195 mmol, 98%) as a colorless solid.

According to the procedure for preparing 3-methoxydibenzo[*b,d*]thiophene 5-oxide (**4d**), benzo[*b*]thieno[2,3-*d*]thiophene 4-oxide (**4i**) and 7-methylbenzo[4',5']thieno[2',3':4,5]benzo[1,2-*d*][1,3]dioxole 5-oxide (**4n**) were prepared from the corresponding sulfinate esters.

A typical procedure for the synthesis of dibenzothiophene *S*-oxides in the presence of 2,6-di(*tert*-butyl)pyridine

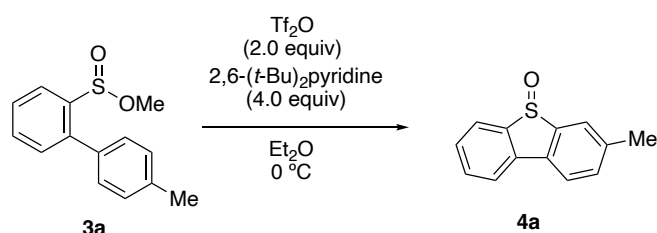

To a mixture of methyl 4'-methyl-[1,1'-biphenyl]-2-sulfinate (**3a**) (24.4 mg, 99.1  $\mu\text{mol}$ ) in diethyl ether (1.0 mL) was added 2,6-di(*tert*-butyl)pyridine (87.9  $\mu\text{L}$ , 0.400 mmol, 4.0 equiv) and trifluoromethanesulfonic anhydride (33.6  $\mu\text{L}$ , 0.200 mmol, 2.0 equiv) at  $0\text{ }^\circ\text{C}$ . After stirring for 1 h at the same temperature, to the mixture was added an aqueous saturated solution of sodium bicarbonate (3 mL). The mixture was extracted with dichloromethane (15 mL  $\times$  3). The combined organic extract was washed with brine (20 mL). The extract was dried with  $\text{Na}_2\text{SO}_4$ . After filtration, the filtrate was concentrated under reduced pressure. The residue was purified by preparative TLC (*n*-hexane/EtOAc = 2/1) to give 3-methyldibenzo[*b,d*]thiophene 5-oxide (**4a**) (21.3 mg, 99.1  $\mu\text{mol}$ , quant.) as a colorless solid.

According to the procedure for preparing benzo[4,5]thieno[2,3-*b*]furan 8-oxide (**4j**), benzo[4,5]thieno[3,2-*b*]benzofuran 10-oxide (**4k**) was prepared from the corresponding sulfinate ester **3k**.

Procedure for the synthesis of dibenzo thiophene *S*-oxide **4a** from biaryl sulfinate ester **3a** via the isolation of 5-methoxy-3-methyl-5*H*-5 $\lambda^4$ -dibenzo[*b,d*]thiophen-5-yl trifluoromethanesulfonate (**7**)

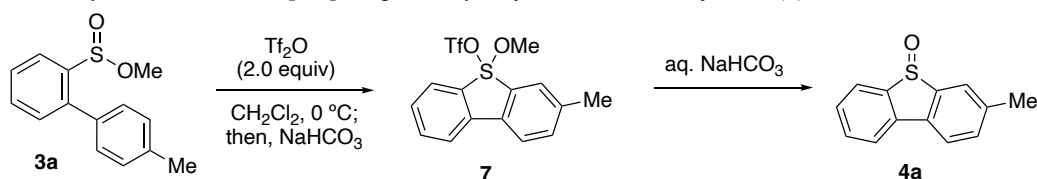

To a mixture of methyl 4'-methyl-[1,1'-biphenyl]-2-sulfinate (**3a**) (24.6 mg, 0.100 mmol) in dichloromethane (1.0 mL) was added trifluoromethanesulfonic anhydride (33.6  $\mu\text{L}$ , 0.200 mmol, 2.0 equiv) at  $0\text{ }^\circ\text{C}$ . After stirring for 1 h at the same temperature, to the mixture was added sodium bicarbonate (42.0 mg, 0.500 mmol, 5.0 equiv). After stirring for 5 min at the same temperature, the mixture was filtrated. The resulting filtrate was concentrated under reduced pressure. The resulting yellow solid was washed with  $\text{Et}_2\text{O}$  (5.0 mL  $\times$  3) and dried under reduced pressure to give 5-methoxy-3-methyl-5*H*-5 $\lambda^4$ -dibenzo[*b,d*]thiophen-5-yl trifluoromethanesulfonate (**7**) (38.1 mg, 0.100 mmol, quant.) as a yellow solid.

To a mixture of 5-methoxy-3-methyl-5*H*-5 $\lambda^4$ -dibenzo[*b,d*]thiophen-5-yl trifluoromethanesulfonate (**5**) (10.7 mg, 28.0  $\mu\text{mol}$ ) in dichloromethane (280  $\mu\text{L}$ ) was added an aqueous saturated solution of sodium bicarbonate (3 mL) and the mixture was extracted with dichloromethane (15 mL  $\times$  3). The combined organic extract was washed with brine (20 mL). The extract was dried with  $\text{Na}_2\text{SO}_4$ . After filtration, the filtrate was concentrated under reduced pressure. The residue was purified by preparative TLC (*n*-hexane/EtOAc = 2/1) to give 3-methyldibenzo[*b,d*]thiophene 5-oxide (**4a**) (6.1 mg, 28  $\mu\text{mol}$ , quant.) as a colorless solid.

### Synthesis of dibenzothiophene **9a** from sulfoxide **8**

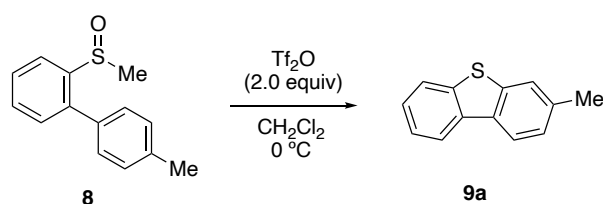

To a mixture of 4'-methyl-2-(methylsulfinyl)-1,1'-biphenyl (**8**) (23.1 mg, 0.100 mmol) in dichloromethane (1.0 mL) was added trifluoromethanesulfonic anhydride (33.6  $\mu\text{L}$ , 0.200 mmol, 2.0 equiv) at  $0\text{ }^\circ\text{C}$ . After stirring for 1 h at the same temperature, to the mixture was added an aqueous saturated solution of sodium bicarbonate (3 mL). The mixture was extracted with dichloromethane (15 mL  $\times$  3). The combined organic extract was washed with brine (20 mL). The extract was dried with  $\text{Na}_2\text{SO}_4$ . After filtration, the filtrate was concentrated under reduced pressure. The residue was purified by preparative TLC (*n*-hexane/EtOAc = 2/1) to give 3-methyldibenzo[*b,d*]thiophene (**9a**) (17.2 mg, 86.7  $\mu\text{mol}$ , 87%) as a colorless solid.

### Synthesis of 3-methyldibenzo[*b,d*]thiophene 5,5-dioxide (**10a**)

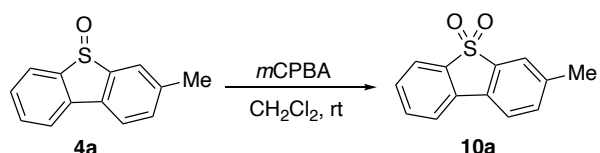

To a mixture of 3-methyldibenzo[*b,d*]thiophene 5-oxide (**4a**) (42.9 mg, 0.200 mmol) in dichloromethane (2.0 mL) was added *m*-chloroperbenzoic acid (*m*CPBA) (69.4 mg, 77%, 0.154 mmol, 1.54 equiv) at room temperature. After stirring for 12 h at room temperature, to the mixture was added an aqueous saturated solution of sodium bicarbonate (3 mL). The mixture was extracted with dichloromethane (15 mL  $\times$  3). The combined organic extract was washed with brine (20 mL). The extract was dried with  $\text{Na}_2\text{SO}_4$ . After filtration, the filtrate was concentrated under reduced pressure. The residue was purified by preparative TLC (*n*-hexane/EtOAc = 2/1) to give 3-methyldibenzo[*b,d*]thiophene 5,5-dioxide (**10a**) (38.3 mg, 0.166 mmol, 83%) as a colorless solid.

### Synthesis of 2,2,2-trifluoro-*N*-(3-methyl-5-oxido-5 $\lambda^4$ -dibenzo[*b,d*]thiophen-5-ylidene)acetamide (**11**)

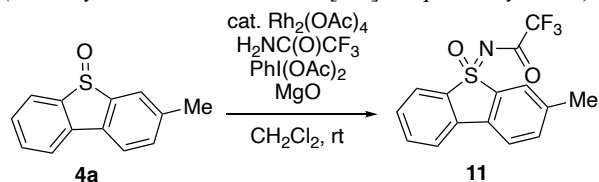

To a mixture of 3-methyldibenzo[*b,d*]thiophene 5-oxide (**4a**) (21.8 mg, 0.102 mmol), trifluoroacetamide (23.0 mg, 0.203 mmol, 2.0 equiv),  $\text{MgO}$  (16.5 mg, 0.401 mmol, 4.0 equiv), and  $\text{Rh}_2(\text{OAc})_4$  (1.10 mg, 2.5  $\mu\text{mol}$ , 2.5 mol %) in  $\text{CH}_2\text{Cl}_2$  (2.0 mL) was added  $\text{PhI}(\text{OAc})_2$  (48.3 mg, 0.150 mmol, 1.5 equiv) at room temperature. After stirring for 6 h at the same temperature, the mixture was concentrated under reduced pressure. The resulting residue was purified by preparative TLC (*n*-hexane/EtOAc = 1/2) to give 2,2,2-trifluoro-*N*-(3-methyl-5-oxido-5 $\lambda^4$ -dibenzo[*b,d*]thiophen-5-ylidene)acetamide *S*-oxide (**11**) (23.6 mg, 72.5  $\mu\text{mol}$ , 72%) as a colorless solid.

## Synthesis of dibenzothiophenes **9**

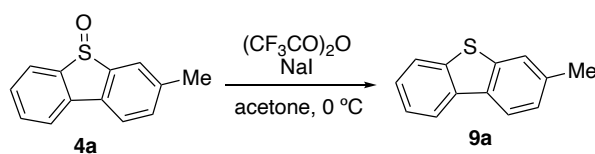

To a solution of 3-methyldibenzo[*b,d*]thiophene 5-oxide (**4a**) (42.9 mg, 0.200 mmol) and NaI (71.9 mg, 0.48 mmol, 2.4 equiv) in acetone (1.0 mL) was added dropwise a solution of TFAA (67.2  $\mu\text{L}$ , 0.48 mmol, 2.4 equiv) in acetone (400  $\mu\text{L}$ ) at  $0\text{ }^\circ\text{C}$ . After stirring for 1 h at the same temperature, the resulting brown solution was diluted with Et<sub>2</sub>O (10 mL). The mixture was extracted with a saturated solution of Na<sub>2</sub>S<sub>2</sub>O<sub>3</sub> (15 mL  $\times$  3). The combined organic extract was washed with brine (20 mL). The extract was dried with Na<sub>2</sub>SO<sub>4</sub>. After filtration, the filtrate was concentrated under reduced pressure. The residue was purified by preparative TLC (*n*-hexane) to give 3-methyldibenzo[*b,d*]thiophene (**9a**) (29.8 mg, 0.150 mmol, 75%) as a colorless solid.

According to the procedure for preparing 3-methyldibenzo[*b,d*]thiophene (**9a**), benzo[*b*]thieno[2,3-*d*]thiophene (**9b**) and benzo[4,5]thieno[2,3-*b*]furan (**9c**) were prepared from the corresponding sulfoxides.

### Oxidation of **9b** with *m*CPBA

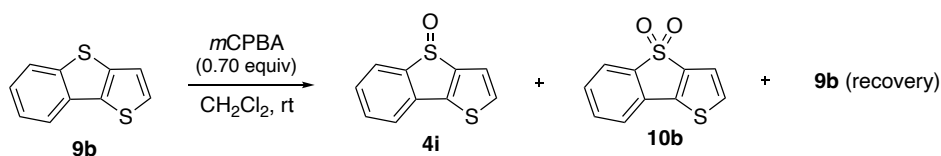

To a mixture of benzo[*b*]thieno[2,3-*d*]thiophene (**9b**) (19.0 mg, 0.100 mmol) in dichloromethane (1.0 mL) was added *m*-chloroperbenzoic acid (*m*CPBA) (17.3 mg, 77%, 77  $\mu\text{mol}$ , 0.77 equiv) at room temperature. After stirring for 12 h at room temperature, to the mixture was added an aqueous saturated solution of sodium bicarbonate (3 mL). The mixture was extracted with dichloromethane (15 mL  $\times$  3). The combined organic extract was washed with brine (20 mL). The extract was dried with Na<sub>2</sub>SO<sub>4</sub>. After filtration, the filtrate was concentrated under reduced pressure. The residue was purified by preparative TLC (*n*-hexane/EtOAc = 1/2) to give benzo[*b*]thieno[2,3-*d*]thiophene 4-oxide (**4i**) (9.1 mg, 44  $\mu\text{mol}$ , 44%), benzo[*b*]thieno[2,3-*d*]thiophene 4,4-dioxide (**10b**) (2.6 mg, 12  $\mu\text{mol}$ , 12%), and benzo[*b*]thieno[2,3-*d*]thiophene (**9b**) (3.1 mg, 16  $\mu\text{mol}$ , 16%) as a colorless solid.

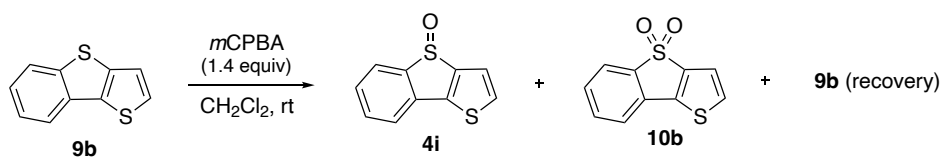

To a mixture of benzo[*b*]thieno[2,3-*d*]thiophene (**9b**) (19.0 mg, 0.100 mmol) in dichloromethane (1.0 mL) was added *m*-chloroperbenzoic acid (*m*CPBA) (34.5 mg, 77%, 0.154 mmol, 1.54 equiv) at room temperature. After stirring for 12 h at room temperature, to the mixture was added an aqueous saturated solution of sodium bicarbonate (3 mL). The mixture was extracted with dichloromethane (15 mL  $\times$  3). The combined organic extract was washed with brine (20 mL). The extract was dried with Na<sub>2</sub>SO<sub>4</sub>. After filtration, the filtrate was concentrated under reduced pressure. The residue was purified by preparative TLC (*n*-hexane/EtOAc = 1/2) to give benzo[*b*]thieno[2,3-*d*]thiophene 4-oxide (**4i**) (9.6 mg, 47  $\mu\text{mol}$ , 47%) and benzo[*b*]thieno[2,3-*d*]thiophene 4,4-dioxide (**10b**) (7.9 mg, 36  $\mu\text{mol}$ , 36%) as a colorless solid, in which benzo[*b*]thieno[2,3-*d*]thiophene was not detected.

### Oxidation of **9c** with *m*CPBA

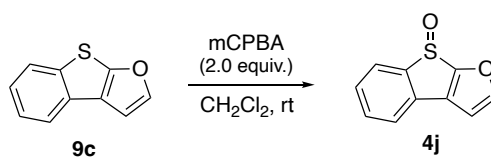

To a mixture of benzo[4,5]thieno[2,3-*b*]furan (**6c**) (1.7 mg, 10 μmol) in dichloromethane (100 μL) was added *m*-chloroperbenzoic acid (*m*CPBA) (3.5 mg, 77%, 15 μmol, 1.54 equiv) at room temperature. After stirring for 12 h at room temperature, to the mixture was added an aqueous saturated solution of sodium bicarbonate (3 mL). The mixture was extracted with dichloromethane (5 mL × 3). The combined organic extract was washed with brine (10 mL). The extract was dried with Na<sub>2</sub>SO<sub>4</sub>. After filtration, the filtrate was concentrated under reduced pressure. Benzo[4,5]thieno[2,3-*b*]furan 8-oxide (**4j**) was not detected, and a complex mixture of products was observed in the analysis of the resulting residue by <sup>1</sup>H NMR (CDCl<sub>3</sub>).

### Synthesis of 4-(but-2-yn-1-yl)-3-methyldibenzo[*b,d*]thiophene (**13**) and 6-(but-2-yn-1-yl)-3-methyldibenzo[*b,d*]thiophene (**13'**)

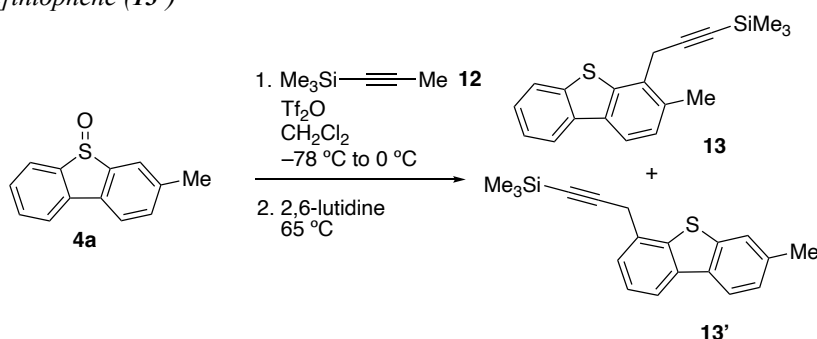

To a solution of dibenzothiophene *S*-oxide (32.1 mg, 0.150 mmol) in CH<sub>2</sub>Cl<sub>2</sub> (0.75 mL) was slowly added Tf<sub>2</sub>O (32.7 μL, 0.195 mmol, 1.3 equiv) and propargyltrimethylsilane (28.9 μL, 0.195 mmol, 1.3 equiv) at -78 °C. After stirring 15 min at the same temperature, the reaction was warmed to 0 °C. After stirring 30 min at the same temperature, 2,6-lutidine (52.4 μL, 0.452 mmol, 3.0 equiv) was added at room temperature. After stirring for 12 h at 65 °C, to the mixture was added water (3 mL). The mixture was extracted with dichloromethane (5 mL × 3). The combined organic extract was washed with brine (10 mL). The extract was dried with Na<sub>2</sub>SO<sub>4</sub>. After filtration, the filtrate was concentrated under reduced pressure. The residue was purified by preparative TLC (*n*-hexane) to give a mixture of 4-(but-2-yn-1-yl)-3-methyldibenzo[*b,d*]thiophene (**13**) and 6-(but-2-yn-1-yl)-3-methyldibenzo[*b,d*]thiophene (**13'**) (40.2 mg, 0.13 mmol, **13**:**13'** = 4:1) as a pale yellow solid.

### Synthesis of 2-methoxy-4-(phenylamino)dibenzo[*b,d*]thiophene 5-oxide (**14**)

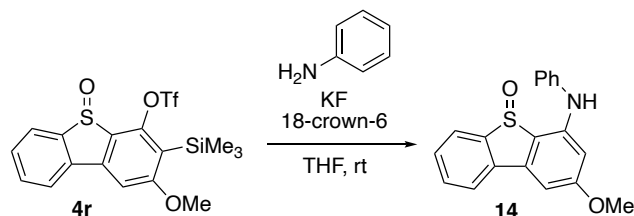

To a mixture of 2-methoxy-5-oxido-3-(trimethylsilyl)dibenzo[*b,d*]thiophen-4-yl trifluoromethanesulfonate (**4r**) (9.0 mg, 20 μmol) and aniline (9.3 mg, 0.10 mmol, 5.0 equiv.) in THF (100 μL) was added KF (3.5 mg, 60.0 μmol, 3.0 equiv) and 18-crown-6 (15.9 mg, 60.0 μmol, 3.0 equiv) at room temperature. After stirring for 48 h at the same temperature, to the mixture was added water (1 mL). The mixture was extracted with EtOAc (5 mL × 3). The combined organic extract was washed with brine (2 mL). The extract was dried with Na<sub>2</sub>SO<sub>4</sub>. After filtration, the filtrate was concentrated under reduced pressure. The residue was purified by preparative TLC (*n*-hexane/EtOAc = 2/1) to give 2-methoxy-4-(phenylamino)dibenzo[*b,d*]thiophene 5-oxide (**14**) (3.5 mg, 11 μmol, 55%) as a yellow oil.



Synthesis of 1-benzyl-4-methoxy-1*H*-benzo[4',5']thieno[2',3':3,4]benzo[1,2-*d*][1,2,3]triazole 10-oxide (**15**)

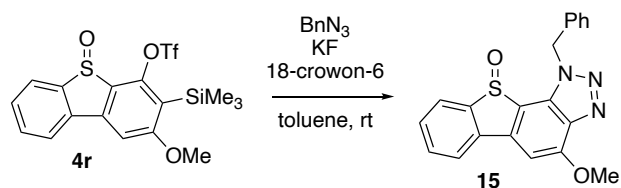

To a mixture of 2-methoxy-5-oxido-3-(trimethylsilyl)dibenzo[*b,d*]thiophen-4-yl trifluoromethanesulfonate (**12b**) (9.0 mg, 20  $\mu\text{mol}$ ) in toluene (120  $\mu\text{L}$ ) was added  $\text{BnN}_3$  (13.2 mg, 0.10 mmol, 5.0 equiv),  $\text{KF}$  (9.3 mg, 0.16 mmol, 8.0 equiv), and 18-crown-6 (43.2 mg, 0.16 mmol, 8.0 equiv) at room temperature. After stirring for 12 h at the same temperature, to the mixture was added water (1 mL). The mixture was extracted with EtOAc (5 mL  $\times$  3). The combined organic extract was washed with brine (2 mL). The extract was dried with  $\text{Na}_2\text{SO}_4$ . After filtration, the filtrate was concentrated under reduced pressure. The residue was purified by preparative TLC (*n*-hexane/EtOAc = 2/1) to give 1-benzyl-4-methoxy-1*H*-benzo[4',5']thieno[2',3':3,4]benzo[1,2-*d*][1,2,3]triazole 10-oxide (**15**) (2.8 mg, 7.8  $\mu\text{mol}$ , 39%) as a colorless solid.

## Characterization Data of New Compounds

3-Methyldibenzo[*b,d*]thiophene 5-oxide (**4a**),<sup>S4</sup> 3-methoxydibenzo[*b,d*]thiophene 5-oxide (**4d**),<sup>S4</sup> benzo[*b*]thieno[2,3-*d*]thiophene 4-oxide (**4i**),<sup>S4</sup> and benzo[4,5]thieno[3,2-*b*]benzofuran 10-oxide (**4k**)<sup>S5</sup> were identical in spectra data with those reported in the literature.

Ethyl 3-bromo-4-(methoxysulfinyl)benzoate (**1r**)

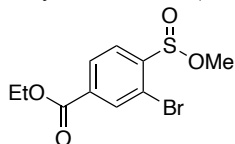

Yield: 75% (1.15 g, 3.74 mmol); Colorless oil; TLC  $R_f$  0.30 (*n*-hexane/EtOAc = 10/1); <sup>1</sup>H NMR (CDCl<sub>3</sub>, 400 MHz): δ 1.41 (t, 3H,  $J$  = 7.1 Hz), 3.61 (s, 3H), 4.42 (q, 2H,  $J$  = 7.1 Hz), 7.99 (d, 1H,  $J$  = 8.0 Hz), 8.17 (dd, 1H,  $J$  = 8.0, 1.5 Hz), 8.28 (d, 1H,  $J$  = 1.5 Hz); <sup>13</sup>C {<sup>1</sup>H} NMR (CDCl<sub>3</sub>, 101 MHz): δ 14.2, 51.8, 61.9, 120.9, 127.0, 128.6, 134.5, 135.4, 146.7, 164.3; IR (NaCl, cm<sup>-1</sup>) 966, 1025, 1110, 1138, 1239, 1275, 1378, 1455, 1459, 1561, 1724, 1727, 2942, 2985; HRMS (ESI)  $m/z$ : [M + Na]<sup>+</sup> Calcd for C<sub>10</sub>H<sub>11</sub>BrNaO<sub>4</sub>S<sup>+</sup> 328.9459; Found 328.9458.

Methyl 4'-methyl-[1,1'-biphenyl]-2-sulfinate (**3a**)

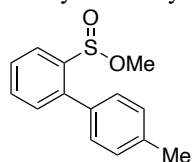

Yield: 94% (235 mg, 0.956 mmol); Pale yellow oil; TLC  $R_f$  0.54 (*n*-hexane/CH<sub>2</sub>Cl<sub>2</sub> = 1/1); <sup>1</sup>H NMR (CDCl<sub>3</sub>, 400 MHz): δ 2.42 (s, 3H), 3.39 (s, 3H), 7.24–7.31 (m, 4H), 7.33–7.39 (m, 1H), 7.53–7.61 (m, 2H), 8.05–8.13 (m, 1H); <sup>13</sup>C {<sup>1</sup>H} NMR (CDCl<sub>3</sub>, 101 MHz): δ 21.2, 51.2, 124.2, 127.6, 129.0, 129.3, 130.7, 132.0, 134.8, 138.0, 141.5, 142.2; IR (NaCl, cm<sup>-1</sup>) 820, 967, 1004, 1129, 1435, 1464, 2938; HRMS (ESI)  $m/z$ : [M + Na]<sup>+</sup> Calcd for C<sub>14</sub>H<sub>14</sub>NaO<sub>2</sub>S<sup>+</sup> 269.0612; Found 269.0612.

Methyl 4'-fluoro-[1,1'-biphenyl]-2-sulfinate (**3b**)

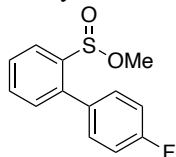

Yield: 98% (1.22 g, 4.90 mmol); Colorless oil; TLC  $R_f$  0.51 (*n*-hexane/EtOAc = 3/1); <sup>1</sup>H NMR (CDCl<sub>3</sub>, 400 MHz): δ 3.40 (s, 3H), 7.11–7.18 (m, 2H), 7.31–7.39 (m, 3H), 7.56–7.62 (m, 2H), 8.06–8.12 (m, 1H); <sup>13</sup>C {<sup>1</sup>H} NMR (CDCl<sub>3</sub>, 101 MHz): δ 51.3, 115.4 (d,  $J$  = 21.7 Hz), 124.4, 128.0, 130.8, 131.1 (d,  $J$  = 8.4 Hz), 132.1, 133.7 (d,  $J$  = 3.3 Hz), 140.4, 142.3, 162.7 (d,  $J$  = 248 Hz); <sup>19</sup>F NMR (CDCl<sub>3</sub>, 376 MHz): δ -113.7 (s); IR (NaCl, cm<sup>-1</sup>) 820, 838, 967, 1096, 1130, 1160, 1223, 1464, 1514, 1605; HRMS (ESI)  $m/z$ : [M + Na]<sup>+</sup> Calcd for C<sub>13</sub>H<sub>11</sub>FN<sub>2</sub>O<sub>2</sub>S<sup>+</sup> 273.0362; Found 273.0362.

Methyl 4'-chloro-[1,1'-biphenyl]-2-sulfinate (**3c**)

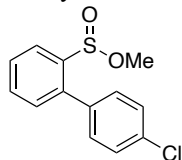

Yield: 67% (892 mg, 3.35 mmol); Pale yellow oil; TLC  $R_f$  0.52 (*n*-hexane/EtOAc = 3/1); <sup>1</sup>H NMR (CDCl<sub>3</sub>, 400 MHz): δ 3.40 (s, 3H), 7.30–7.36 (m, 3H), 7.40–7.45 (AA'BB', 2H), 7.57–7.62 (m, 2H), 8.06–8.12 (m, 1H); <sup>13</sup>C {<sup>1</sup>H} NMR (CDCl<sub>3</sub>, 101 MHz): δ 51.3, 124.4, 128.1, 128.6, 130.6, 130.7, 132.2, 134.4, 136.2, 140.1, 142.2; IR (NaCl, cm<sup>-1</sup>) 830, 967, 1004, 1062, 1092, 1102, 1126, 1462, 1644, 1651; HRMS (ESI)  $m/z$ : [M + Na]<sup>+</sup> Calcd for C<sub>13</sub>H<sub>11</sub>ClNaO<sub>2</sub>S<sup>+</sup> 289.0066; Found 289.0065.

Methyl 4'-methoxy-[1,1'-biphenyl]-2-sulfinate (**3d**)

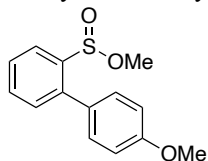

Yield: 87% (239 mg, 0.867 mmol); Pink solid; Mp 65–67 °C; TLC  $R_f$  0.54 (*n*-hexane/EtOAc = 3/1);  $^1\text{H}$  NMR ( $\text{CDCl}_3$ , 400 MHz):  $\delta$  3.41 (s, 3H), 3.86 (s, 3H), 6.95–7.00 (AA'BB' 2H), 7.29–7.37 (m, 3H), 7.52–7.61 (m, 2H), 8.04–8.12 (m, 1H);  $^{13}\text{C}\{^1\text{H}\}$  NMR ( $\text{CDCl}_3$ , 101 MHz):  $\delta$  51.4, 55.3, 113.8, 124.3, 127.5, 130.1, 130.7, 130.9, 132.1, 141.2, 142.4, 159.5; IR (NaCl,  $\text{cm}^{-1}$ ) 1435, 1447, 1455, 1471, 1515, 2820, 2872, 2912, 3039, 3043; HRMS (ESI)  $m/z$ :  $[\text{M} + \text{Na}]^+$  Calcd for  $\text{C}_{14}\text{H}_{14}\text{NaO}_3\text{S}^+$  285.0561; Found 285.0561.

Methyl 3'-methyl-[1,1'-biphenyl]-2-sulfinate (**3e**)

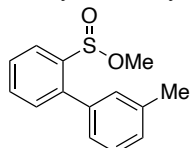

Yield: 86% (1.05 g, 4.28 mmol); Pale yellow oil; TLC  $R_f$  0.47 (*n*-hexane/EtOAc = 3/1);  $^1\text{H}$  NMR ( $\text{CDCl}_3$ , 400 MHz):  $\delta$  2.40 (s, 3H), 3.38 (s, 3H), 7.15–7.25 (m, 3H), 7.28–7.38 (m, 2H), 7.52–7.59 (m, 2H), 8.05–8.12 (m, 1H);  $^{13}\text{C}\{^1\text{H}\}$  NMR ( $\text{CDCl}_3$ , 101 MHz):  $\delta$  21.3, 51.3, 124.1, 126.4, 127.6, 128.1, 128.7, 130.0, 130.5, 131.9, 137.6, 137.9, 141.5, 142.2; IR (NaCl,  $\text{cm}^{-1}$ ) 969, 1067, 1096, 1123, 1159, 1438, 1462, 1591, 2938; HRMS (ESI)  $m/z$ :  $[\text{M} + \text{Na}]^+$  Calcd for  $\text{C}_{14}\text{H}_{14}\text{NaO}_2\text{S}^+$  269.0612; Found 269.0612.

Methyl 2'-methyl-[1,1'-biphenyl]-2-sulfinate (**3f**)

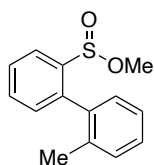

Methyl 2'-methyl-[1,1'-biphenyl]-2-sulfinate was observed as a 1:1 diastereomeric mixture in  $^1\text{H}$  and  $^{13}\text{C}$  NMR analyses due to the chiral sulfur atom and axial chirality at the biphenyl moiety. Yield: 97% (1.20 g, 4.87 mmol); Black oil; TLC  $R_f$  0.41 (*n*-hexane/EtOAc = 3/1);  $^1\text{H}$  NMR ( $\text{CDCl}_3$ , 400 MHz):  $\delta$  2.01 (s, 3H), 2.07 (s, 3H), 3.30 (s, 3H), 3.36 (s, 3H), 7.12 (d, 1H,  $J = 1.3$  Hz), 7.17–7.35 (m, 9H), 7.53–7.62 (m, 4H), 8.04–8.11 (m, 2H);  $^{13}\text{C}\{^1\text{H}\}$  NMR ( $\text{CDCl}_3$ , 101 MHz):  $\delta$  19.9, 20.1, 51.5, 51.9, 123.6, 124.0, 125.2, 125.3, 127.6, 127.7, 128.29, 128.33, 129.6, 129.8, 130.0, 130.2, 130.3, 130.6, 131.5, 132.1, 135.6, 136.5, 136.8, 136.9, 140.5, 140.8, 142.3, 142.6; IR (NaCl,  $\text{cm}^{-1}$ ) 969, 982, 1006, 1036, 1049, 1063, 1125, 1432, 1464, 1493, 2938; HRMS (ESI)  $m/z$ :  $[\text{M} + \text{Na}]^+$  Calcd for  $\text{C}_{14}\text{H}_{14}\text{NaO}_2\text{S}^+$  269.0612; Found 269.0611.

Methyl 2-(naphthalen-2-yl)benzenesulfinate (**3g**)

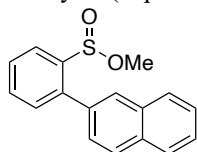

Yield: 81% (1.14 g, 4.03 mmol); Pale yellow solid; Mp 61–63 °C; TLC  $R_f$  0.50 (*n*-hexane/EtOAc = 3/1);  $^1\text{H}$  NMR ( $\text{CDCl}_3$ , 400 MHz):  $\delta$  3.38 (s, 3H), 7.45–7.50 (m, 1H), 7.50–7.58 (m, 3H), 7.59–7.67 (m, 2H), 7.85–7.96 (m, 4H), 8.11–8.18 (m, 1H);  $^{13}\text{C}\{^1\text{H}\}$  NMR ( $\text{CDCl}_3$ , 101 MHz):  $\delta$  51.6, 124.3, 126.57, 126.64, 127.2, 127.8, 127.9, 128.0, 128.2, 128.6, 130.9, 132.1, 132.7, 132.9, 135.2, 141.4, 142.6; IR (NaCl,  $\text{cm}^{-1}$ ) 823, 860, 967, 1126, 3421, 3591; HRMS (ESI)  $m/z$ :  $[\text{M} + \text{Na}]^+$  Calcd for  $\text{C}_{17}\text{H}_{14}\text{NaO}_2\text{S}^+$  305.0612; Found 305.0611.

Methyl 2-(thiophen-3-yl)benzenesulfinate (**3h**)

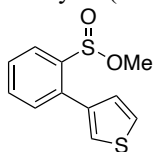

Yield: 95% (1.13 g, 4.73 mmol); Pale yellow oil; TLC  $R_f$  0.57 (*n*-hexane/EtOAc = 3/1);  $^1\text{H}$  NMR ( $\text{CDCl}_3$ , 400 MHz):  $\delta$  3.46 (s, 3H), 7.20 (dd, 1H,  $J = 4.9, 1.3$  Hz), 7.36–7.40 (m, 1H), 7.40–7.47 (m, 2H), 7.52–7.61 (m, 2H), 8.06–8.12 (m, 1H);  $^{13}\text{C}\{^1\text{H}\}$  NMR ( $\text{CDCl}_3$ , 101 MHz):  $\delta$  51.1, 124.4, 124.6, 125.9, 127.7, 128.8, 130.6, 132.1, 136.0, 137.8, 142.1; IR (NaCl,  $\text{cm}^{-1}$ ) 820, 860, 969, 1065, 1086, 1128, 1160, 1193, 1435, 1464; HRMS (ESI)  $m/z$ :  $[\text{M} + \text{Na}]^+$  Calcd for  $\text{C}_{11}\text{H}_{10}\text{NaO}_2\text{S}_2^+$  261.0020; Found 261.0019.

Methyl 2-(thiophen-2-yl)benzenesulfinate (**3i**)

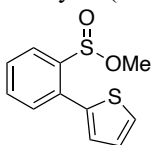

Yield: 88% (21.4 mg, 89.8  $\mu\text{mol}$ ); Brown oil; TLC  $R_f$  0.45 (*n*-hexane/EtOAc = 3/1);  $^1\text{H}$  NMR ( $\text{CDCl}_3$ , 400 MHz):  $\delta$  3.49 (s, 3H), 7.12 (dd, 1H,  $J = 5.1, 3.6$  Hz), 7.21 (dd, 1H,  $J = 3.6, 1.2$  Hz), 7.44 (dd, 1H,  $J = 5.1, 1.2$  Hz), 7.48–7.54 (m, 1H), 7.54–7.60 (m, 2H), 8.08–8.14 (m, 1H);  $^{13}\text{C}\{^1\text{H}\}$  NMR ( $\text{CDCl}_3$ , 101 MHz):  $\delta$  51.2, 124.7, 127.1, 127.5, 128.2, 128.5, 131.4, 132.1, 133.7, 138.3, 142.4; IR (NaCl,  $\text{cm}^{-1}$ ) 801, 1633, 1644, 1657; HRMS (ESI)  $m/z$ :  $[\text{M} + \text{Na}]^+$  Calcd for  $\text{C}_{11}\text{H}_{10}\text{NaO}_2\text{S}_2^+$  261.0020; Found 261.0018.

Methyl 2-(furan-3-yl)benzenesulfinate (**3j**)

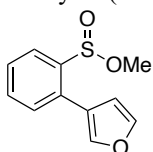

Yield: 94% (210 mg, 0.943 mmol); Black oil; TLC  $R_f$  0.56 (*n*-hexane/EtOAc = 3/1);  $^1\text{H}$  NMR ( $\text{CDCl}_3$ , 400 MHz):  $\delta$  3.47 (s, 3H), 6.57–6.63 (m, 1H), 7.43 (dd, 1H,  $J = 7.3, 1.6$  Hz), 7.48–7.59 (m, 3H), 7.63 (s, 1H), 8.08 (dd, 1H,  $J = 7.3, 1.6$  Hz);  $^{13}\text{C}\{^1\text{H}\}$  NMR ( $\text{CDCl}_3$ , 101 MHz):  $\delta$  50.2, 111.5, 122.0, 124.6, 127.5, 130.4, 131.9, 132.2, 141.2, 141.5, 143.2; IR (NaCl,  $\text{cm}^{-1}$ ) 874, 921, 967, 1016, 1033, 1046, 1102, 1126, 1163, 1461, 1508; HRMS (ESI)  $m/z$ :  $[\text{M} + \text{Na}]^+$  Calcd for  $\text{C}_{11}\text{H}_{10}\text{NaO}_3\text{S}^+$  245.0248; Found 245.0249.

Methyl 2-(benzofuran-2-yl)benzenesulfinate (**3k**)

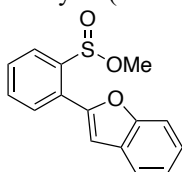

Yield: 92% (251 mg, 0.922 mmol); Brown oil; TLC  $R_f$  0.59 (*n*-hexane/EtOAc = 3/1);  $^1\text{H}$  NMR ( $\text{CDCl}_3$ , 400 MHz):  $\delta$  3.52 (s, 3H), 7.14 (d, 1H,  $J = 0.8$  Hz), 7.28 (ddd, 1H,  $J = 7.2, 7.2, 1.1$  Hz), 7.36 (ddd, 1H,  $J = 7.2, 7.2, 1.2$  Hz), 7.55 (dd, 1H,  $J = 7.2, 0.8$  Hz), 7.60 (ddd, 1H,  $J = 7.6, 7.6, 1.5$  Hz), 7.62–7.68 (m, 2H), 7.93 (dd, 1H,  $J = 7.6, 1.6$  Hz), 8.20 (dd, 1H,  $J = 7.6, 1.5$  Hz);  $^{13}\text{C}\{^1\text{H}\}$  NMR ( $\text{CDCl}_3$ , 101 MHz):  $\delta$  50.9, 107.0, 111.2, 121.5, 123.2, 125.1, 125.2, 128.5, 128.65, 128.66, 129.1, 132.2, 141.3, 152.1, 155.0; IR (NaCl,  $\text{cm}^{-1}$ ) 803, 921, 966, 1020, 1125, 1165, 1258, 1431, 1447; HRMS (ESI)  $m/z$ :  $[\text{M} + \text{Na}]^+$  Calcd for  $\text{C}_{15}\text{H}_{12}\text{NaO}_3\text{S}^+$  295.0405; Found 295.0404.

Methyl 4',5-dimethyl-[1,1'-biphenyl]-2-sulfinate (**3l**)

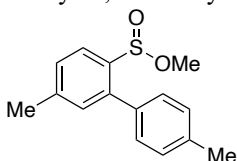

Yield: 88% (92.1 mg, 0.354 mmol); Brown oil; TLC  $R_f$  0.50 (*n*-hexane/EtOAc = 4/1);  $^1\text{H}$  NMR ( $\text{CDCl}_3$ , 400 MHz):  $\delta$  2.41 (s, 3H), 2.44 (s, 3H), 3.38 (s, 3H), 7.16 (s, 1H), 7.22–7.29 (m, 4H), 7.36 (d, 1H,  $J = 8.0$  Hz), 7.96 (d, 1H,  $J = 8.0$  Hz);  $^{13}\text{C}\{^1\text{H}\}$  NMR ( $\text{CDCl}_3$ , 101 MHz):  $\delta$  21.3, 21.5, 51.0, 124.5, 128.3, 129.0, 129.3, 131.5, 135.0,

137.9, 139.4, 141.4, 142.6; IR (NaCl,  $\text{cm}^{-1}$ ) 818, 969, 1072, 1125, 1455, 1462, 1515, 1597, 2938; HRMS (ESI)  $m/z$ :  $[\text{M} + \text{Na}]^+$  Calcd for  $\text{C}_{15}\text{H}_{16}\text{NaO}_2\text{S}^+$  283.0769; Found 283.0768.

Methyl 3,4',5-trimethyl-[1,1'-biphenyl]-2-sulfinate (**3m**)

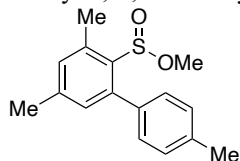

Yield: quant. (6.7 mg, 25  $\mu\text{mol}$ ); Yellow oil; TLC  $R_f$  0.30 (*n*-hexane/ $\text{CH}_2\text{Cl}_2 = 1/1$ );  $^1\text{H}$  NMR ( $\text{CDCl}_3$ , 400 MHz):  $\delta$  2.35 (s, 3H), 2.41 (s, 3H), 2.77 (s, 3H), 3.72 (s, 3H), 6.92 (s, 1H), 7.07 (s, 1H), 7.19–7.22 (m, 4H);  $^{13}\text{C}\{^1\text{H}\}$  NMR ( $\text{CDCl}_3$ , 101 MHz):  $\delta$  18.8, 21.1 (two signals overlapped), 54.8, 128.5, 128.8, 129.5, 132.8, 135.7, 137.4, 138.2, 138.6, 141.4, 142.3; IR (NaCl,  $\text{cm}^{-1}$ ) 820, 986, 1128, 1452, 1459, 1512, 1595, 2933; HRMS (ESI)  $m/z$ :  $[\text{M} + \text{Na}]^+$  Calcd for  $\text{C}_{16}\text{H}_{18}\text{NaO}_2\text{S}^+$  297.0925; Found 297.0923.

Methyl 6-(*p*-tolyl)benzo[*d*][1,3]dioxole-5-sulfinate (**3n**)

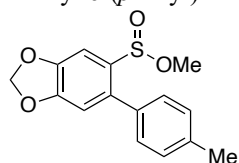

Yield: 67% (77.5 mg, 0.267 mmol); Colorless solid; Mp 86–88  $^\circ\text{C}$ ; TLC  $R_f$  0.50 (*n*-hexane/ $\text{EtOAc} = 2/1$ );  $^1\text{H}$  NMR ( $\text{CDCl}_3$ , 400 MHz):  $\delta$  2.40 (s, 3H), 3.43 (s, 3H), 6.06–6.10 (m, 2H), 6.78 (s, 1H), 7.23 (s, 4H), 7.53 (s, 1H);  $^{13}\text{C}\{^1\text{H}\}$  NMR ( $\text{CDCl}_3$ , 101 MHz):  $\delta$  21.2, 51.1, 102.0, 104.2, 110.5, 129.0, 129.4, 134.4, 136.3, 137.0, 138.0, 147.4, 150.6; IR (NaCl,  $\text{cm}^{-1}$ ) 970, 1037, 1120, 1228, 1475, 2918, 2935, 3852; HRMS (ESI)  $m/z$ :  $[\text{M} + \text{Na}]^+$  Calcd for  $\text{C}_{15}\text{H}_{14}\text{NaO}_4\text{S}^+$  313.0511; Found 313.0512.

Methyl 5-chloro-4'-methyl-1,1'-biphenyl-2-sulfinate (**3o**)

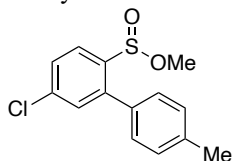

Yield: 70% (39.6 mg, 0.141 mmol); Pale yellow oil; TLC  $R_f$  0.45 (*n*-hexane/ $\text{EtOAc} = 4/1$ );  $^1\text{H}$  NMR ( $\text{CDCl}_3$ , 400 MHz):  $\delta$  2.42 (s, 3H), 3.38 (s, 3H), 7.23–7.28 (m, 4H), 7.35 (d, 1H,  $J = 2.1$  Hz), 7.52 (dd, 1H,  $J = 8.4, 2.1$  Hz), 8.01 (d, 1H,  $J = 8.4$  Hz);  $^{13}\text{C}\{^1\text{H}\}$  NMR ( $\text{CDCl}_3$ , 101 MHz):  $\delta$  21.2, 51.3, 126.1, 127.7, 129.1, 129.2, 130.6, 133.5, 138.2, 138.6, 140.8, 143.0; IR (NaCl,  $\text{cm}^{-1}$ ) 818, 911, 969, 1016, 1059, 1093, 1129, 1452, 1551, 1581; HRMS (ESI)  $m/z$ :  $[\text{M} + \text{Na}]^+$  Calcd for  $\text{C}_{14}\text{H}_{13}\text{ClNaO}_2\text{S}^+$  303.0223; Found 303.0222.

Methyl 4'-methyl-5-(trifluoromethyl)-1,1'-biphenyl-2-sulfinate (**3p**)

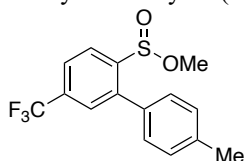

Yield: 87% (101 mg, 0.323 mmol); Brown solid; Mp 48–49  $^\circ\text{C}$ ; TLC  $R_f$  0.55 (*n*-hexane/ $\text{EtOAc} = 4/1$ );  $^1\text{H}$  NMR ( $\text{CDCl}_3$ , 400 MHz):  $\delta$  2.43 (s, 3H), 3.41 (s, 3H), 7.25–7.35 (m, 4H), 7.62 (s, 1H), 7.81 (dd, 1H,  $J = 8.1, 1.1$  Hz), 8.21 (d, 1H,  $J = 8.1$  Hz);  $^{13}\text{C}\{^1\text{H}\}$  NMR ( $\text{CDCl}_3$ , 101 MHz):  $\delta$  21.2, 51.8, 123.4 (q,  $J = 273$  Hz), 124.4 (q,  $J = 3.7$  Hz), 125.2, 127.7 (q,  $J = 3.6$  Hz), 129.1, 129.3, 133.5, 133.8 (q,  $J = 32.8$  Hz), 138.8, 142.3, 146.0;  $^{19}\text{F}$  NMR ( $\text{CDCl}_3$ , 376 MHz):  $\delta$  -62.9 (s) IR (NaCl,  $\text{cm}^{-1}$ ) 818, 969, 1053, 1082, 1128, 1170, 1258, 1292, 1335, 1414; HRMS (ESI)  $m/z$ :  $[\text{M} + \text{Na}]^+$  Calcd for  $\text{C}_{15}\text{H}_{13}\text{F}_3\text{NaO}_2\text{S}^+$  337.0486; Found 337.0488.

Ethyl 6-(methoxysulfinyl)-4'-methyl-[1,1'-biphenyl]-3-carboxylate (**3q**)

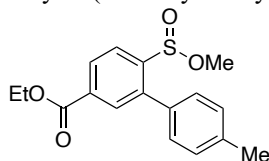

Yield: quant. (161 mg, 0.504 mmol); Pale yellow oil; TLC  $R_f$  0.26 (*n*-hexane/EtOAc = 7/1);  $^1\text{H}$  NMR ( $\text{CDCl}_3$ , 400 MHz):  $\delta$  1.40 (t, 3H,  $J = 7.1$  Hz), 2.43 (s, 3H), 3.40 (s, 3H), 4.41 (q, 2H,  $J = 7.1$  Hz), 7.25–7.32 (m, 4H), 8.03 (d, 1H,  $J = 1.6$  Hz), 8.15 (d, 1H,  $J = 8.2$  Hz), 8.20 (dd, 1H,  $J = 8.2, 1.6$  Hz);  $^{13}\text{C}\{^1\text{H}\}$  NMR ( $\text{CDCl}_3$ , 101 MHz):  $\delta$  14.1, 21.1, 51.4, 61.4, 124.5, 128.3, 129.06, 129.11, 131.7, 133.5, 133.9, 138.2, 141.5, 146.2, 165.3; IR (NaCl,  $\text{cm}^{-1}$ ) 821, 969, 1106, 1132, 1245, 1276, 1285, 1305, 1723; HRMS (ESI)  $m/z$ :  $[\text{M} + \text{Na}]^+$  Calcd for  $\text{C}_{17}\text{H}_{18}\text{NaO}_4\text{S}^+$  341.0824; Found 341.0823.

Methyl (*E*)-2-styrylbenzenesulfinate (**3r**)

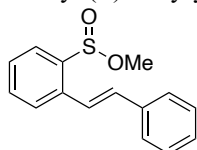

Yield: 38% (95.1 mg, 0.368 mmol); Pale yellow solid; Mp 44–45 °C; TLC  $R_f$  0.57 (*n*-hexane/EtOAc = 3/1);  $^1\text{H}$  NMR ( $\text{CDCl}_3$ , 400 MHz):  $\delta$  3.48 (s, 3H), 7.13 (d, 1H,  $J = 16.0$  Hz), 7.29–7.35 (AA'BB'C, 1H), 7.36–7.43 (AA'BB'C, 2H), 7.48 (ddd, 1H,  $J = 7.6, 7.6, 1.2$  Hz), 7.51–7.59 (m, 4H), 7.75 (d, 1H,  $J = 7.6$  Hz), 7.98 (dd, 1H,  $J = 7.6, 1.2$  Hz);  $^{13}\text{C}\{^1\text{H}\}$  NMR ( $\text{CDCl}_3$ , 101 MHz):  $\delta$  49.8, 122.2, 125.0, 126.1, 126.9, 127.7, 128.5, 128.8, 132.4, 132.8, 136.5, 136.6, 140.2; IR (NaCl,  $\text{cm}^{-1}$ ) 963, 1050, 1129, 1158, 1449, 1464, 1495, 2939, 3058; HRMS (ESI)  $m/z$ :  $[\text{M} + \text{Na}]^+$  Calcd for  $\text{C}_{15}\text{H}_{14}\text{NaO}_2\text{S}^+$  281.0612; Found 281.0614.

5-Methoxy-2'-(methoxysulfinyl)-4-(trimethylsilyl)-[1,1'-biphenyl]-3-yl trifluoromethanesulfonate (**3s**)

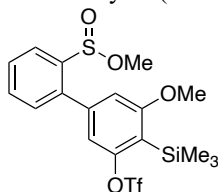

Yield: 93% (224 mg, 0.464 mmol); Pale yellow oil; TLC  $R_f$  0.58 (*n*-hexane/EtOAc = 2/1);  $^1\text{H}$  NMR ( $\text{CDCl}_3$ , 400 MHz):  $\delta$  0.40 (s, 9H), 3.43 (s, 3H), 3.85 (s, 3H), 6.86 (d, 1H,  $J = 1.1$  Hz), 6.97 (d, 1H,  $J = 1.1$  Hz), 7.34–7.39 (m, 1H), 7.59–7.66 (m, 2H), 8.09–8.14 (m, 1H);  $^{13}\text{C}\{^1\text{H}\}$  NMR ( $\text{CDCl}_3$ , 101 MHz):  $\delta$  0.7, 51.1, 55.7, 110.8, 113.8, 118.5 (q,  $J = 320$  Hz), 120.6, 124.7, 128.6, 130.4, 132.3, 139.4, 141.5, 142.2, 154.3, 165.1;  $^{19}\text{F}$  NMR ( $\text{CDCl}_3$ , 376 MHz):  $\delta$  -72.8 (s); IR (NaCl,  $\text{cm}^{-1}$ ) 847, 940, 1046, 1065, 1140, 1216, 1249, 1395, 1418, 1422; HRMS (ESI)  $m/z$ :  $[\text{M} + \text{Na}]^+$  Calcd for  $\text{C}_{18}\text{H}_{21}\text{F}_3\text{NaO}_6\text{S}_2\text{Si}^+$  505.0399; Found 505.0396.

3-Fluorodibenzo[*b,d*]thiophene 5-oxide (**4b**)

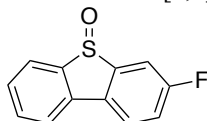

Yield: 85% (37.2 mg, 0.171 mmol); Pale yellow solid; Mp 176–179 °C; TLC  $R_f$  0.40 ( $\text{CH}_2\text{Cl}_2/\text{MeOH} = 10/1$ );  $^1\text{H}$  NMR ( $\text{CDCl}_3$ , 400 MHz):  $\delta$  7.25 (ddd, 1H,  $J = 8.5, 8.5, 2.4$  Hz), 7.47 (ddd, 1H,  $J = 7.5, 7.5, 1.1$  Hz), 7.58 (ddd, 1H,  $J = 7.5, 7.5, 1.1$  Hz), 7.67 (dd, 1H,  $J = 8.5, 2.4$  Hz), 7.71–7.79 (m, 2H), 7.96 (d, 1H,  $J = 7.5$  Hz);  $^{13}\text{C}\{^1\text{H}\}$  NMR ( $\text{CDCl}_3$ , 101 MHz):  $\delta$  115.0 (d,  $J = 22.9$  Hz), 119.9 (d,  $J = 22.9$  Hz), 121.6, 123.2 (d,  $J = 7.2$  Hz), 127.5, 129.1, 132.7, 133.1 (d,  $J = 3.1$  Hz), 136.2, 145.0, 146.8 (d,  $J = 7.2$  Hz), 163.1 (d,  $J = 253$  Hz);  $^{19}\text{F}$  NMR ( $\text{CDCl}_3$ , 376 MHz):  $\delta$  -109.7 (s); IR (NaCl,  $\text{cm}^{-1}$ ) 873, 1025, 1052, 1069, 1196, 1261, 1445, 1459, 1491; HRMS (ESI)  $m/z$ :  $[\text{M} + \text{Na}]^+$  Calcd for  $\text{C}_{12}\text{H}_7\text{FNaOS}^+$  241.0099; Found 241.0097.

### 3-Chlorodibenzo[*b,d*]thiophene 5-oxide (**4c**)

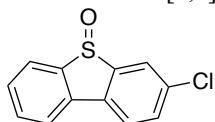

Yield: 71% (33.4 mg, 0.142 mmol); Colorless solid; Mp 192–194 °C; TLC  $R_f$  0.29 (*n*-hexane/EtOAc = 2/1);  $^1\text{H}$  NMR ( $\text{CDCl}_3$ , 400 MHz):  $\delta$  7.52 (ddd, 1H,  $J = 7.5, 7.5, 1.1$  Hz), 7.57 (dd, 1H,  $J = 8.2, 1.9$  Hz), 7.62 (ddd, 1H,  $J = 7.5, 7.5, 1.1$  Hz), 7.74 (d, 1H,  $J = 8.2$  Hz), 7.78 (d, 1H,  $J = 7.5$  Hz), 7.95–8.01 (m, 2H);  $^{13}\text{C}\{^1\text{H}\}$  NMR ( $\text{CDCl}_3$ , 101 MHz):  $\delta$  121.9, 122.8, 127.6, 127.8, 129.8, 132.8 (two signals overlapped), 135.50, 135.53, 136.2, 145.1, 146.6; IR (NaCl,  $\text{cm}^{-1}$ ) 1018, 1063, 1092, 1392, 1435, 1455; HRMS (EI)  $m/z$ :  $[\text{M} + \text{Na}]^+$  Calcd for  $\text{C}_{12}\text{H}_7\text{ClNaOS}^+$  256.9804; Found 256.9809.

### 2-Methyldibenzo[*b,d*]thiophene 5-oxide (**4e**) and 4-Methyldibenzo[*b,d*]thiophene 5-oxide (**4e'**)

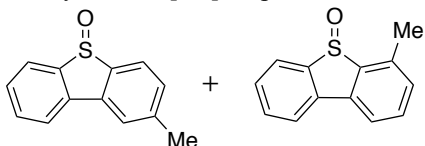

2-Methyldibenzo[*b,d*]thiophene 5-oxide was isolated with a small amount of 4-methyldibenzo[*b,d*]thiophene 5-oxide. The ratio **4e/4e'** was judged from  $^1\text{H}$  NMR analysis of the isolated product. Yield: 76% (83.0 mg, 0.388 mmol); Pale yellow solid; Mp 102–104 °C; TLC  $R_f$  0.43 (*n*-hexane/EtOAc = 1/2); For **4e**:  $^1\text{H}$  NMR (MeOD, 400 MHz):  $\delta$  2.46 (s, 3H), 7.27 (dd, 1H,  $J = 7.8, 0.7$  Hz), 7.46 (ddd, 1H,  $J = 7.5, 7.5, 1.0$  Hz), 7.53–7.60 (m, 2H), 7.75 (d, 1H,  $J = 7.5$  Hz), 7.83 (d, 1H,  $J = 7.8$  Hz), 7.95 (dd, 1H,  $J = 7.5$  Hz);  $^{13}\text{C}\{^1\text{H}\}$  NMR ( $\text{CDCl}_3$ , 101 MHz):  $\delta$  21.7, 123.5, 124.0, 128.3, 128.4, 130.9, 131.7, 134.2, 138.5, 138.7, 142.2, 145.59, 145.65; For **4e'**:  $^1\text{H}$  NMR ( $\text{CDCl}_3$ , 400 MHz):  $\delta$  2.72 (s, 3H), 7.21 (d, 1H,  $J = 7.5$  Hz), 7.42–7.49 (m, 2H), 7.53–7.60 (m, 2H), 7.75 (d, 1H,  $J = 7.5$  Hz), 7.95 (d, 1H,  $J = 7.5$  Hz);  $^{13}\text{C}\{^1\text{H}\}$  NMR ( $\text{CDCl}_3$ , 101 MHz):  $\delta$  18.6, 121.1, 123.6, 128.3, 132.4, 134.2, 134.7, 138.6, 138.7, 140.3, 143.1, 144.7, 145.6; IR (NaCl,  $\text{cm}^{-1}$ ) 814, 1023, 1066, 1435, 1441, 1447, 1451, 1455, 1600; HRMS (ESI)  $m/z$ :  $[\text{M} + \text{Na}]^+$  Calcd for  $\text{C}_{13}\text{H}_{10}\text{OS}^+$  237.0350; Found 237.0356.

### 1-Methyldibenzo[*b,d*]thiophene 5-oxide (**4f**)

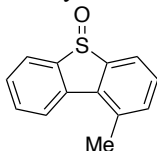

Yield: 79% (33.6 mg, 0.157 mmol); Colorless solid; Mp 123–125 °C; TLC  $R_f$  0.58 (*n*-hexane/EtOAc = 1/3);  $^1\text{H}$  NMR ( $\text{CDCl}_3$ , 400 MHz):  $\delta$  2.74 (s, 3H), 7.36–7.43 (m, 2H), 7.50 (ddd, 1H,  $J = 7.6, 7.6, 1.0$  Hz), 7.61 (ddd, 1H,  $J = 7.6, 7.6, 1.2$  Hz), 7.85–7.89 (m, 1H), 7.98 (d, 1H,  $J = 7.9$  Hz), 8.03 (dd, 1H,  $J = 7.6, 1.2$  Hz);  $^{13}\text{C}\{^1\text{H}\}$  NMR ( $\text{CDCl}_3$ , 101 MHz):  $\delta$  21.8, 125.39, 125.42, 127.9, 128.8, 129.0, 132.5, 135.0, 135.4, 135.5, 138.3, 145.2, 145.6; IR (NaCl,  $\text{cm}^{-1}$ ) 1435, 1447, 1455, 1471, 2730, 2893, 2910; HRMS (ESI)  $m/z$ :  $[\text{M} + \text{Na}]^+$  Calcd for  $\text{C}_{13}\text{H}_{10}\text{NaOS}^+$  237.0351; Found 237.0350.

### Benzo[*b*]naphtho[2,1-*d*]thiophene 11-oxide (**4g**)

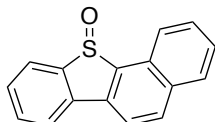

Yield: 82% (41.0 mg, 0.164 mmol); Yellow solid; Mp 175–176 °C; TLC  $R_f$  0.43 (*n*-hexane/EtOAc = 1/2);  $^1\text{H}$  NMR ( $\text{CDCl}_3$ , 400 MHz):  $\delta$  7.51 (ddd, 1H,  $J = 7.5, 7.5, 1.1$  Hz), 7.54–7.63 (m, 2H), 7.68 (ddd, 1H,  $J = 8.2, 7.0, 1.2$  Hz), 7.81–7.85 (m, 2H), 7.92 (d, 1H,  $J = 8.2$  Hz), 8.01–8.05 (m, 2H), 8.51 (dd, 1H,  $J = 8.2, 0.8$  Hz);  $^{13}\text{C}\{^1\text{H}\}$  NMR ( $\text{CDCl}_3$ , 101 MHz):  $\delta$  118.7, 122.0, 123.9, 127.25, 127.32, 128.8, 129.0, 129.3, 130.6, 132.4, 133.7, 133.9, 135.5, 137.3, 140.3, 145.2; IR (NaCl,  $\text{cm}^{-1}$ ) 820, 863, 1019, 1053, 1140, 1472; HRMS (ESI)  $m/z$ :  $[\text{M} + \text{Na}]^+$  Calcd for  $\text{C}_{16}\text{H}_{10}\text{NaOS}^+$  273.0350; Found 273.0350.

Benzo[*b*]thieno[3,2-*d*]thiophene 8-oxide (**4h**)

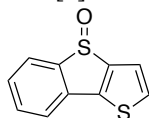

Yield: 82% (33.7 mg, 0.163 mmol); Brown solid; Mp 114–115 °C; TLC  $R_f$  0.57 (*n*-hexane/EtOAc = 1/2);  $^1\text{H}$  NMR ( $\text{CDCl}_3$ , 400 MHz):  $\delta$  7.34 (d, 1H,  $J = 5.0$  Hz), 7.43 (ddd, 1H,  $J = 7.5, 7.5, 1.3$  Hz), 7.54 (ddd, 1H,  $J = 7.5, 7.5, 1.1$  Hz), 7.60 (d, 1H,  $J = 7.5$  Hz), 7.73 (d, 1H,  $J = 5.0$  Hz), 7.90 (d, 1H,  $J = 7.5$  Hz);  $^{13}\text{C}\{^1\text{H}\}$  NMR ( $\text{CDCl}_3$ , 101 MHz):  $\delta$  119.6, 121.8, 127.4, 128.1, 132.2, 133.6, 136.7, 144.1, 147.9, 151.4; IR (NaCl,  $\text{cm}^{-1}$ ) 1374, 1435, 1447, 1455, 1471, 2724, 2923, 3048, 3053; HRMS (ESI)  $m/z$ :  $[\text{M} + \text{Na}]^+$  Calcd for  $\text{C}_{10}\text{H}_6\text{NaOS}_2^+$  228.9753; Found 228.9758.

Benzo[4,5]thieno[2,3-*b*]furan 8-oxide (**4j**)

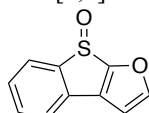

Yield: 72% (31.4 mg, 0.143 mmol); Brown solid; Mp 67–69 °C; TLC  $R_f$  0.52 (*n*-hexane/EtOAc = 1/2);  $^1\text{H}$  NMR ( $\text{CDCl}_3$ , 400 MHz):  $\delta$  6.74 (d, 1H,  $J = 1.9$  Hz), 7.40 (ddd, 1H,  $J = 7.6, 7.6, 1.7$  Hz), 7.45–7.53 (m, 2H), 7.68 (d, 1H,  $J = 1.9$  Hz), 7.81 (d, 1H,  $J = 7.6$  Hz);  $^{13}\text{C}\{^1\text{H}\}$  NMR ( $\text{CDCl}_3$ , 101 MHz):  $\delta$  106.2, 122.0, 127.6, 128.5, 130.7, 132.2, 133.5, 149.1, 152.2, 158.6; IR (NaCl,  $\text{cm}^{-1}$ ) 1029, 1085, 1125, 1261, 1447, 1455; HRMS (ESI)  $m/z$ :  $[\text{M} + \text{Na}]^+$  Calcd for  $\text{C}_{10}\text{H}_6\text{NaO}_2\text{S}^+$  212.9985; Found 212.9986.

2,7-Dimethyldibenzo[*b,d*]thiophene 5-oxide (**4l**)

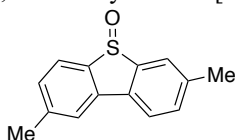

Yield: 83% (18.9 mg, 82.7  $\mu\text{mol}$ ); Colorless solid; Mp 152–153 °C; TLC  $R_f$  0.60 (*n*-hexane/EtOAc = 1/2);  $^1\text{H}$  NMR ( $\text{CDCl}_3$ , 400 MHz):  $\delta$  2.45–2.46 (br, 3H), 2.47 (s, 3H), 7.24–7.27 (m, 1H), 7.38 (dq, 1H,  $J = 7.8, 0.7$  Hz), 7.56 (s, 1H), 7.66 (d, 1H,  $J = 7.8$  Hz), 7.78 (s, 1H), 7.83 (d, 1H,  $J = 7.8$  Hz);  $^{13}\text{C}\{^1\text{H}\}$  NMR ( $\text{CDCl}_3$ , 101 MHz):  $\delta$  21.4, 21.8, 121.5, 122.1, 127.2, 127.9, 129.8, 133.2, 134.5, 137.4, 140.0, 142.0, 143.2, 145.6; IR (NaCl,  $\text{cm}^{-1}$ ) 821, 1027, 1065, 1447, 1451, 1603; HRMS (ESI)  $m/z$ :  $[\text{M} + \text{Na}]^+$  Calcd for  $\text{C}_{14}\text{H}_{12}\text{NaOS}^+$  251.0507; Found 251.0504.

2,4,7-Trimethyldibenzo[*b,d*]thiophene 5-oxide (**4m**)

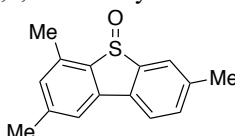

Yield: 57% (3.3 mg, 14  $\mu\text{mol}$ ); Pale yellow solid; Mp 132–134 °C; TLC  $R_f$  0.71 (*n*-hexane/EtOAc = 2/1);  $^1\text{H}$  NMR ( $\text{CDCl}_3$ , 400 MHz):  $\delta$  2.41 (s, 3H), 2.45 (s, 3H), 2.68 (s, 3H), 7.01 (s, 1H), 7.32–7.40 (m, 2H), 7.61 (d, 1H,  $J = 7.8$  Hz), 7.75 (s, 1H);  $^{13}\text{C}\{^1\text{H}\}$  NMR ( $\text{CDCl}_3$ , 101 MHz):  $\delta$  18.6, 21.4, 21.6, 119.7, 121.5, 127.7, 131.3, 133.0, 134.7, 137.6, 138.9, 139.8, 140.1, 143.3, 145.2; IR (NaCl,  $\text{cm}^{-1}$ ) 821, 1027, 1065, 1437, 1447, 1455, 1490, 1603; HRMS (ESI)  $m/z$ :  $[\text{M} + \text{Na}]^+$  Calcd for  $\text{C}_{15}\text{H}_{14}\text{NaOS}^+$  265.0663; Found 265.0662.

7-Methylbenzo[4',5']thieno[2',3':4,5]benzo[1,2-*d*][1,3]dioxole 5-oxide (**4n**)

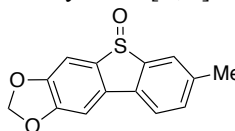

Yield: 82% (5.3 mg, 21  $\mu\text{mol}$ ); Pale yellow solid; Mp 180–182 °C; TLC  $R_f$  0.43 (*n*-hexane/EtOAc = 1/2);  $^1\text{H}$  NMR ( $\text{CDCl}_3$ , 400 MHz):  $\delta$  2.44 (s, 3H), 6.10 (s, 2H), 7.15 (s, 1H), 7.32–7.38 (m, 2H), 7.51 (d, 1H,  $J = 7.8$  Hz), 7.72 (s, 1H);  $^{13}\text{C}\{^1\text{H}\}$  NMR ( $\text{CDCl}_3$ , 101 MHz):  $\delta$  21.3, 101.8, 102.4, 107.5, 120.8, 127.7, 132.7, 137.2, 134.3, 138.3, 139.0, 145.6, 148.8, 151.8; IR (NaCl,  $\text{cm}^{-1}$ ) 924, 1020, 1036, 1057, 1223, 1261, 1470; HRMS (ESI)  $m/z$ :  $[\text{M} + \text{Na}]^+$  Calcd for  $\text{C}_{14}\text{H}_{10}\text{NaO}_3\text{S}^+$  281.0248; Found 281.0249.



#### 2-Chloro-7-methyldibenzo[*b,d*]thiophene 5-oxide (**4o**)

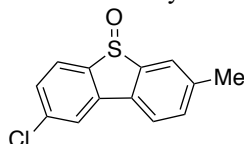

Yield: 85% (21.1 mg, 84.8  $\mu\text{mol}$ ); Colorless solid; Mp 174–176 °C; TLC  $R_f$  0.26 (*n*-hexane/EtOAc = 1/2);  $^1\text{H}$  NMR ( $\text{CDCl}_3$ , 400 MHz):  $\delta$  2.48 (s, 3H), 7.39–7.45 (m, 2H), 7.66 (d, 1H,  $J = 7.8$  Hz), 7.73 (d, 1H,  $J = 1.9$  Hz), 7.79 (s, 1H), 7.88 (d, 1H,  $J = 8.2$  Hz);  $^{13}\text{C}\{^1\text{H}\}$  NMR ( $\text{CDCl}_3$ , 101 MHz):  $\delta$  21.5, 121.88, 121.93, 128.1, 128.6, 129.0, 133.3, 133.5, 139.1 (two signals overlapped), 141.0, 143.1, 145.9; IR (NaCl,  $\text{cm}^{-1}$ ) 823, 1014, 1029, 1057, 1086, 1448, 1488, 1565, 1585; HRMS (ESI)  $m/z$ :  $[\text{M} + \text{Na}]^+$  Calcd for  $\text{C}_{13}\text{H}_9\text{ClNaOS}^+$  270.9960; Found 270.9964.

#### 7-Methyl-2-(trifluoromethyl)dibenzo[*b,d*]thiophene 5-oxide (**4p**)

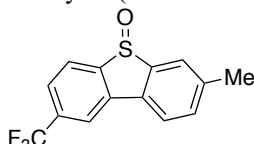

Yield: 68% (38.3 mg, 0.136 mmol); Colorless solid; Mp 146–148 °C; TLC  $R_f$  0.39 (*n*-hexane/EtOAc = 2/1);  $^1\text{H}$  NMR ( $\text{CDCl}_3$ , 400 MHz):  $\delta$  2.48 (s, 3H), 7.44 (d, 1H,  $J = 7.8$  Hz), 7.67–7.77 (m, 2H), 7.81 (s, 1H), 7.97 (s, 1H), 8.07 (d, 1H,  $J = 8.0$  Hz);  $^{13}\text{C}\{^1\text{H}\}$  NMR ( $\text{CDCl}_3$ , 101 MHz):  $\delta$  21.5, 118.0 (q,  $J = 3.7$  Hz), 122.1, 123.4 (q,  $J = 273$  Hz), 125.7 (q,  $J = 3.7$  Hz), 127.9, 128.1, 133.0, 133.7, 134.6 (q,  $J = 32.9$  Hz), 138.1, 141.3, 145.5, 148.2;  $^{19}\text{F}$  NMR ( $\text{CDCl}_3$ , 376 MHz):  $\delta$  -62.9 (s) IR (NaCl,  $\text{cm}^{-1}$ ) 826, 1033, 1055, 1128, 1170, 1641, 1656, 3421; HRMS (ESI)  $m/z$ :  $[\text{M} + \text{Na}]^+$  Calcd for  $\text{C}_{14}\text{H}_9\text{F}_3\text{NaOS}^+$  305.0224; Found 305.0222.

#### Ethyl 7-methyldibenzo[*b,d*]thiophene-2-carboxylate 5-oxide (**4q**)

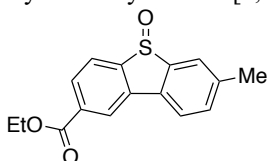

Yield: 70% (22.7 mg, 79.3  $\mu\text{mol}$ ); Pale yellow solid; Mp 171–173 °C; TLC  $R_f$  0.47 (*n*-hexane/EtOAc = 2/1);  $^1\text{H}$  NMR ( $\text{CDCl}_3$ , 400 MHz):  $\delta$  1.45 (t, 3H,  $J = 7.1$  Hz), 2.49 (s, 3H), 4.45 (q, 2H,  $J = 7.1$  Hz), 7.44 (d, 1H,  $J = 7.8$  Hz), 7.77–7.83 (m, 2H), 8.03 (d, 1H,  $J = 7.9$  Hz), 8.14 (dd, 1H,  $J = 7.9, 1.0$  Hz), 8.41 (d, 1H,  $J = 1.0$  Hz);  $^{13}\text{C}\{^1\text{H}\}$  NMR ( $\text{CDCl}_3$ , 101 MHz):  $\delta$  14.3, 21.5, 61.7, 122.1, 122.6, 127.4, 128.0, 130.0, 133.59, 133.63, 134.4, 137.6, 140.8, 145.3, 148.8, 165.4; IR (NaCl,  $\text{cm}^{-1}$ ) 1028, 1246, 1273, 1417, 1714; HRMS (ESI)  $m/z$ :  $[\text{M} + \text{Na}]^+$  Calcd for  $\text{C}_{16}\text{H}_{14}\text{NaO}_3\text{S}$  309.0561; Found 309.0563.

#### 2-Methoxy-5-oxido-3-(trimethylsilyl)dibenzo[*b,d*]thiophen-4-yl trifluoromethanesulfonate (**4r**)

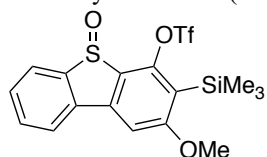

Yield: 76% (16.5 mg, 38.0  $\mu\text{mol}$ ); Colorless solid; Mp 224–226 °C; TLC  $R_f$  0.51 (*n*-hexane/EtOAc = 1/2);  $^1\text{H}$  NMR ( $\text{CDCl}_3$ , 400 MHz):  $\delta$  0.40 (s, 9H), 3.99 (s, 3H), 7.19 (s, 1H), 7.55 (ddd, 1H,  $J = 7.4, 7.4, 1.0$  Hz), 7.62 (ddd, 1H,  $J = 7.4, 7.4, 0.8$  Hz), 7.79 (d, 1H,  $J = 7.4$  Hz), 7.95 (d, 1H,  $J = 7.4$  Hz);  $^{13}\text{C}\{^1\text{H}\}$  NMR ( $\text{CDCl}_3$ , 101 MHz):  $\delta$  0.4, 56.1, 103.0, 118.4 (q,  $J = 321$  Hz), 122.2, 125.0, 127.4, 130.5, 130.7, 132.6, 136.1, 143.3, 146.0, 150.1, 169.7;  $^{19}\text{F}$  NMR ( $\text{CDCl}_3$ , 376 MHz):  $\delta$  -72.8 (s); IR (NaCl,  $\text{cm}^{-1}$ ) 810, 1030, 1062, 1136, 1216, 1222, 1378; HRMS (ESI)  $m/z$ :  $[\text{M} + \text{Na}]^+$  Calcd for  $\text{C}_{17}\text{H}_{17}\text{F}_3\text{NaO}_5\text{S}_2\text{Si}^+$  473.0131; Found 473.0123.

The regiochemistry of **4r** was determined by the NOESY experiment.

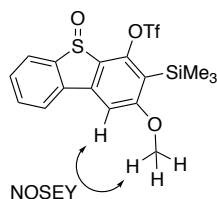

### 2-Phenylbenzo[*b*]thiophene 1-oxide (6)

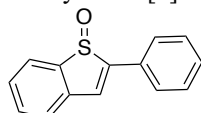

Yield: 59% (13.4 mg, 59.2  $\mu\text{mol}$ ); Pale yellow solid; Mp 132–134 °C; TLC  $R_f$  0.34 (*n*-hexane/EtOAc = 2/1);  $^1\text{H}$  NMR ( $\text{CDCl}_3$ , 400 MHz):  $\delta$  7.29 (s, 1H), 7.39–7.56 (m, 6H), 7.78–7.83 (m, 2H), 7.95 (d, 1H,  $J = 7.5$  Hz);  $^{13}\text{C}\{^1\text{H}\}$  NMR ( $\text{CDCl}_3$ , 101 MHz):  $\delta$  124.5, 126.4, 126.6, 127.0, 128.4, 129.2, 129.5, 130.8, 132.3, 137.8, 144.1, 152.4; IR (NaCl,  $\text{cm}^{-1}$ ) 1025, 1063, 2852, 2923, 3048, 3056, 3852; HRMS (EI)  $m/z$ :  $[\text{M} + \text{Na}]^+$  Calcd for  $\text{C}_{14}\text{H}_{10}\text{NaOS}^+$  249.0350; Found 249.0352.

### 5-Methoxy-3-methyl-5*H*-5 $\lambda^4$ -dibenzo[*b,d*]thiophen-5-yl trifluoromethanesulfonate (7)

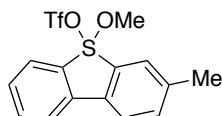

Yield: quant. (38.1 mg, 0.101 mmol); Yellow solid; Mp 89–90 °C;  $^1\text{H}$  NMR ( $\text{CDCl}_3$ , 400 MHz):  $\delta$  2.54 (s, 3H), 3.64 (s, 3H), 7.64–7.70 (m, 2H), 7.84–7.90 (m, 2H), 7.95 (d, 1H,  $J = 7.6$  Hz), 8.13 (s, 1H), 8.29 (d, 1H,  $J = 7.8$  Hz);  $^{13}\text{C}\{^1\text{H}\}$  NMR ( $\text{CD}_3\text{CN}$ , 101 MHz):  $\delta$  21.4, 58.4, 121.7 (q,  $J = 319.7$  Hz), 124.8, 124.9, 128.8, 128.9, 131.6, 131.8, 132.2, 138.6, 139.2 (two signals overlapped), 142.0, 144.1;  $^{19}\text{F}$  NMR ( $\text{CDCl}_3$ , 376 MHz):  $\delta$  -78.4 (s); IR (NaCl,  $\text{cm}^{-1}$ ) 1029, 1062, 1173, 1232, 1259, 1455. Gradual decomposition was observed in  $\text{CDCl}_3$ .

### Benzo[4,5]thieno[2,3-*b*]furan (9c)

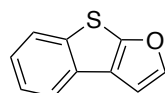

Yield: 66% (11.5 mg, 66.0  $\mu\text{mol}$ ); Brown oil; TLC  $R_f$  0.44 (*n*-hexane);  $^1\text{H}$  NMR ( $\text{CDCl}_3$ , 400 MHz):  $\delta$  6.95 (d, 1H,  $J = 2.0$  Hz), 7.27–7.33 (m, 1H), 7.37–7.43 (m, 1H), 7.68 (d, 1H,  $J = 2.0$  Hz), 7.77 (d, 1H,  $J = 7.8$  Hz), 7.80 (d, 1H,  $J = 7.8$  Hz);  $^{13}\text{C}\{^1\text{H}\}$  NMR ( $\text{CDCl}_3$ , 101 MHz):  $\delta$  106.0, 121.3, 123.7, 123.9, 124.2, 124.9, 130.0, 139.4, 148.0, 154.6; IR (NaCl,  $\text{cm}^{-1}$ ) 1009, 1050, 1119, 1236, 1259, 1328, 1435, 1488; HRMS (EI)  $m/z$ :  $[\text{M}]^+$  Calcd for  $\text{C}_{10}\text{H}_6\text{OS}^+$  174.0139; Found 174.0139.

### Benzo[*b*]thieno[2,3-*d*]thiophene 4,4-dioxide (10b)

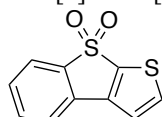

Yield: 36% (7.9 mg, 0.0355 mmol); Colorless solid; Mp 300 °C over; TLC  $R_f$  0.66 (*n*-hexane/EtOAc = 2/1);  $^1\text{H}$  NMR ( $\text{CDCl}_3$ , 400 MHz):  $\delta$  7.30 (s, 1H), 7.43–7.49 (m, 3H), 7.56 (ddd, 1H,  $J = 7.6, 7.6, 1.1$  Hz), 7.71–7.75 (m, 1H);  $^{13}\text{C}\{^1\text{H}\}$  NMR ( $\text{CDCl}_3$ , 101 MHz):  $\delta$  120.0, 121.4, 122.2, 128.1, 129.6, 131.1, 133.7, 139.9, 142.1, 142.8; IR (NaCl,  $\text{cm}^{-1}$ ) 1027, 1093, 1146, 1261, 1288, 1634, 1646, 1651, 2963; HRMS (ESI)  $m/z$ :  $[\text{M} + \text{Na}]^+$  Calcd for  $\text{C}_{10}\text{H}_6\text{NaO}_2\text{S}_2^+$  244.9707; Found 244.9705.

### 2,2,2-Trifluoro-*N*-(3-methyl-5-oxido-5 $\lambda^4$ -dibenzo[*b,d*]thiophen-5-ylidene)acetamide (11)

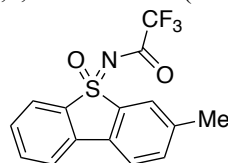

Yield: 73% (23.6 mg, 72.5  $\mu\text{mol}$ ); Colorless solid; Mp 198–200 °C; TLC  $R_f$  0.59 (*n*-hexane/EtOAc = 1/2);  $^1\text{H}$  NMR ( $\text{CDCl}_3$ , 400 MHz):  $\delta$  2.50 (s, 3H), 7.52–7.60 (m, 2H), 7.71–7.76 (m, 2H), 7.81 (d, 1H,  $J = 7.7$  Hz), 8.02 (s, 1H), 8.21 (d, 1H,  $J = 7.8$  Hz);  $^{13}\text{C}\{^1\text{H}\}$  NMR ( $\text{CDCl}_3$ , 101 MHz):  $\delta$  21.6, 116.0 (q,  $J = 287$  Hz), 121.7, 121.8, 125.7, 125.8, 130.5, 130.6, 133.5, 135.1, 135.2, 135.5, 136.3, 142.2, 165.1 (q,  $J = 38.4$  Hz);  $^{19}\text{F}$  NMR ( $\text{CDCl}_3$ ,

376 MHz):  $\delta$  -75.3 (s); IR (NaCl,  $\text{cm}^{-1}$ ) 820, 1155, 1169, 1202, 1231, 1671; HRMS (ESI)  $m/z$ :  $[\text{M} + \text{Na}]^+$  Calcd for  $\text{C}_{15}\text{H}_{10}\text{F}_3\text{NNaO}_2\text{S}^+$  348.0282; Found 348.0283.

Trimethyl(3-(3-methyldibenzo[*b,d*]thiophen-4-yl)prop-1-yn-1-yl)silane (**13**) and

Trimethyl(3-(7-methyldibenzo[*b,d*]thiophen-4-yl)prop-1-yn-1-yl)silane (**13'**)

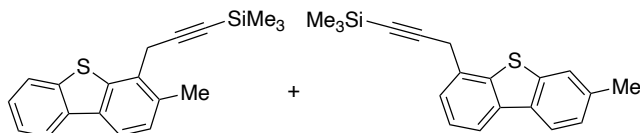

Trimethyl(3-(3-methyldibenzo[*b,d*]thiophen-4-yl)prop-1-yn-1-yl)silane and trimethyl(3-(7-methyldibenzo[*b,d*]thiophen-4-yl)prop-1-yn-1-yl)silane were isolated as an inseparable mixture. The ratio **13/13'** was judged from  $^1\text{H}$  NMR analysis. Yield: 87% (40.2 mg, 0.130 mmol); Pale yellow solid; Mp 119–120 °C; TLC  $R_f$  0.35 (*n*-hexane); For **13**:  $^1\text{H}$  NMR ( $\text{CDCl}_3$ , 400 MHz):  $\delta$  0.12 (s, 9H), 2.56 (s, 3H), 3.82 (s, 2H), 7.30 (d, 1H,  $J$  = 9.2 Hz), 7.40–7.46 (m, 2H), 7.83–7.89 (m, 1H), 7.96 (d, 1H  $J$  = 7.9 Hz), 8.07–8.13 (m, 1H);  $^{13}\text{C}\{^1\text{H}\}$  NMR ( $\text{CDCl}_3$ , 101 MHz):  $\delta$  -0.01, 19.5, 23.5, 86.0, 102.0, 119.9, 121.3, 122.7, 124.3, 126.3, 127.5, 128.9, 134.0, 135.0, 136.2, 139.1, 140.0; For **13'**:  $^1\text{H}$  NMR ( $\text{CDCl}_3$ , 400 MHz):  $\delta$  0.22 (s, 9H), 2.52 (s, 3H), 3.86 (s, 2H), 7.25–7.27 (m, 1H), 7.47 (d, 1H,  $J$  = 7.6 Hz), 7.58 (dd, 1H,  $J$  = 7.3, 0.9 Hz), 7.67 (s, 1H), 8.00–8.05 (m, 2H);  $^{13}\text{C}\{^1\text{H}\}$  NMR ( $\text{CDCl}_3$ , 101 MHz):  $\delta$  0.04, 21.7, 25.4, 88.3, 102.2, 119.8, 121.4, 122.8, 124.8, 125.3, 126.0, 130.6, 133.5, 135.7, 136.9, 138.0, 139.3; IR (NaCl,  $\text{cm}^{-1}$ ) 816, 841, 1019, 1249, 1448, 2172, 2959; HRMS (ESI)  $m/z$ :  $[\text{M} + \text{Na}]^+$  Calcd for  $\text{C}_{19}\text{H}_{20}\text{NaOSSI}^+$  347.0902; Found 347.0909.

2-Methoxy-4-(phenylamino)dibenzo[*b,d*]thiophene 5-oxide (**14**)

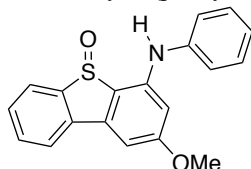

Yield: 55% (3.5 mg, 11  $\mu\text{mol}$ ); Yellow oil; TLC  $R_f$  0.47 (*n*-hexane/EtOAc = 2/1);  $^1\text{H}$  NMR ( $\text{CDCl}_3$ , 400 MHz):  $\delta$  3.86 (s, 3H), 6.82 (d, 1H,  $J$  = 2.1 Hz), 6.87–6.91 (m, 2H), 7.08–7.14 (AA'BB'C, 1H), 7.24–7.30 (m, 2H), 7.35–7.42 (AA'BB'C, 2H), 7.54 (ddd, 1H,  $J$  = 7.5, 7.5, 1.1 Hz), 7.62 (ddd, 1H,  $J$  = 7.5, 7.5, 1.1 Hz), 7.79 (d, 1H,  $J$  = 7.5 Hz), 8.00 (d, 1H,  $J$  = 7.5 Hz);  $^{13}\text{C}\{^1\text{H}\}$  NMR ( $\text{CDCl}_3$ , 101 MHz):  $\delta$  55.8, 99.9, 100.8, 120.7, 121.7, 122.1, 123.2, 127.1, 129.5, 129.6, 132.2, 136.9, 139.7, 140.5, 145.5, 146.0, 164.9; IR (NaCl,  $\text{cm}^{-1}$ ) 1090, 1205, 1434, 1497, 1575, 1578, 1593; HRMS (ESI)  $m/z$ :  $[\text{M} + \text{Na}]^+$  Calcd for  $\text{C}_{19}\text{H}_{15}\text{NNaO}_2\text{S}^+$  344.0721; Found 344.0723.

The regiochemistry of **14** was determined by the NOESY experiment.

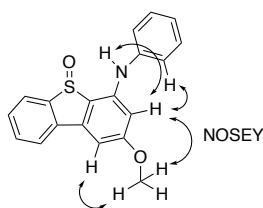

1-Benzyl-4-methoxy-1*H*-benzo[4',5']thieno[2',3':3,4]benzo[1,2-*d*][1,2,3]triazole 10-oxide (**15**)

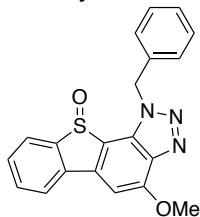

Yield: 28% (2.1 mg, 5.6  $\mu\text{mol}$ ); Colorless solid; Mp 228–230 °C; TLC  $R_f$  0.31 (*n*-hexane/EtOAc = 2/1);  $^1\text{H}$  NMR ( $\text{CDCl}_3$ , 400 MHz):  $\delta$  4.28 (s, 3H), 6.12 (d, 1H,  $J$  = 15.9 Hz), 6.29 (d, 1H,  $J$  = 15.9 Hz), 7.08 (s, 1H), 7.30–7.39 (m, 3H), 7.42–7.47 (m, 2H), 7.53 (ddd, 1H,  $J$  = 7.5, 7.5, 1.1 Hz), 7.62 (ddd, 1H,  $J$  = 7.5, 7.5, 1.1 Hz), 7.82 (d, 1H,  $J$  = 7.5 Hz), 7.95 (d, 1H,  $J$  = 7.5 Hz);  $^{13}\text{C}\{^1\text{H}\}$  NMR ( $\text{CDCl}_3$ , 101 MHz):  $\delta$  29.7, 53.7, 57.1, 97.5, 118.0, 122.4,

127.3, 127.5, 128.5, 129.0, 130.0, 132.5, 133.3, 135.2, 136.5, 140.1, 145.9, 156.0; IR (NaCl,  $\text{cm}^{-1}$ ) 1036, 1173, 1232, 1259, 2849, 2918; HRMS (ESI)  $m/z$ :  $[\text{M} + \text{Na}]^+$  Calcd for  $\text{C}_{20}\text{H}_{15}\text{N}_3\text{NaO}_2\text{S}^+$  384.0783; Found 384.0785.

The regiochemistry of **15** was determined by the NOESY experiment and  $^1\text{H}$  NMR analysis. NOESY experiment showed no correlation between the benzyl and methoxy protons. In  $^1\text{H}$  NMR analysis, it was shown that the benzylic protons close to the sulfoxide moiety appeared at 6.22–6.33 ppm, while the benzylic protons far from the sulfoxide appeared at 5.79–5.85 ppm.<sup>S6</sup> According to this low-field shift by the neighboring sulfoxide moiety, the regiochemistry of **15** was judged from the benzylic protons at 6.12 and 6.29 ppm.

### References for the Supporting Information

- S1 A. Kobayashi, T. Matsuzawa, T. Hosoya, S. Yoshida, *Chem. Commun.* **2020**, 56, 5429
- S2 K. Nakamura, Y. Kumagai, A. Kobayashi, S. Yoshida, *Org. Biomol. Chem.* **2023**, 21, 6886.
- S3 S. Yoshida, K. Shimomori, T. Nonaka, T. Hosoya, *Chem. Lett.*, **2015**, 44, 1324.
- S4 R. Wada, S. Kaga, Y. Kawai, K. Futamura, T. Murai, F. Shibahara, *Tetrahedron* **2021**, 83, 131978.
- S5 Z. He, H. J. Shriver, J. A. Fernández-Salas, A. Abengózar, J. Neufeld, K. Yang, A. P. Pulis, D. J. Procter, *Angew. Chem. Int. Ed.* **2018**, 57, 5759.
- S6 Y. Nakamura, Y. Miyata, K. Uchida, S. Yoshida, T. Hosoya, *Org. Lett.* **2019**, 21, 5252.

### <sup>1</sup>H and <sup>13</sup>C NMR Spectra of Compounds

<sup>1</sup>H NMR (400 MHz) and <sup>13</sup>C NMR (101 MHz) spectra of ethyl 3-bromo-4-(methoxysulfinyl)benzoate (**1r**) (CDCl<sub>3</sub>)

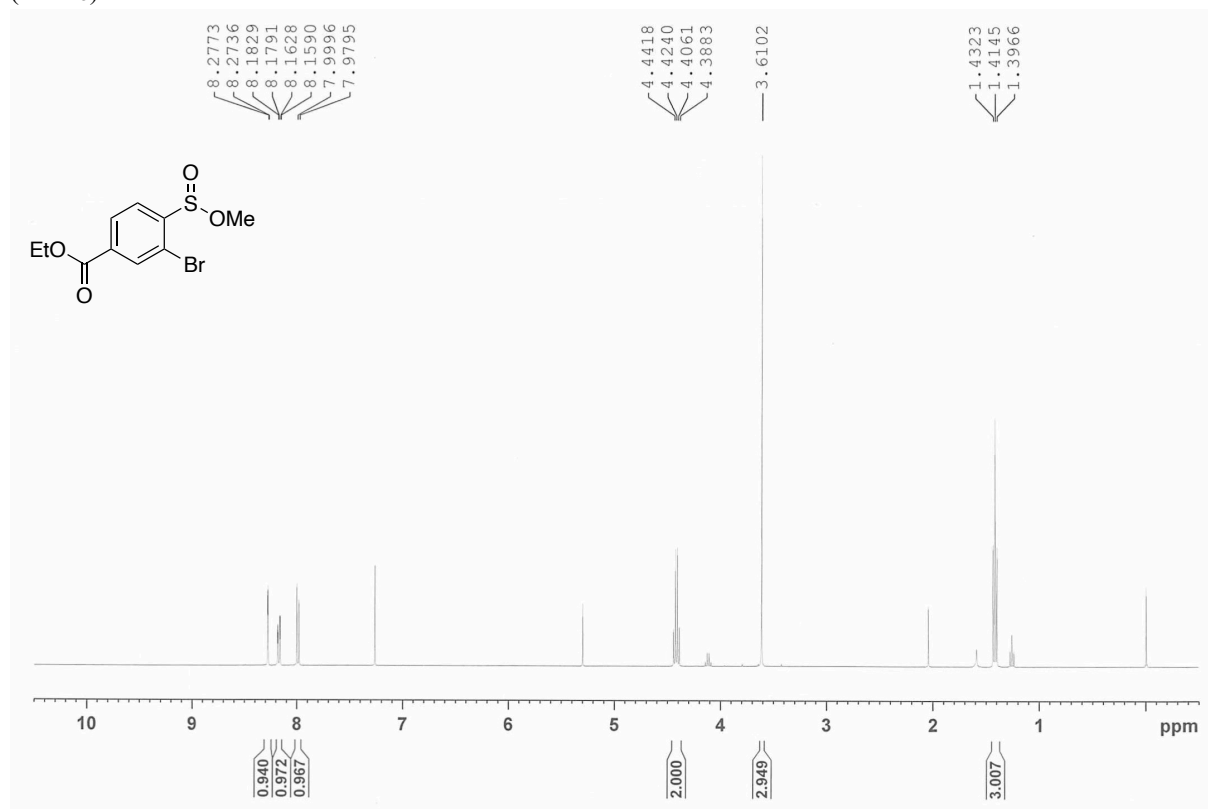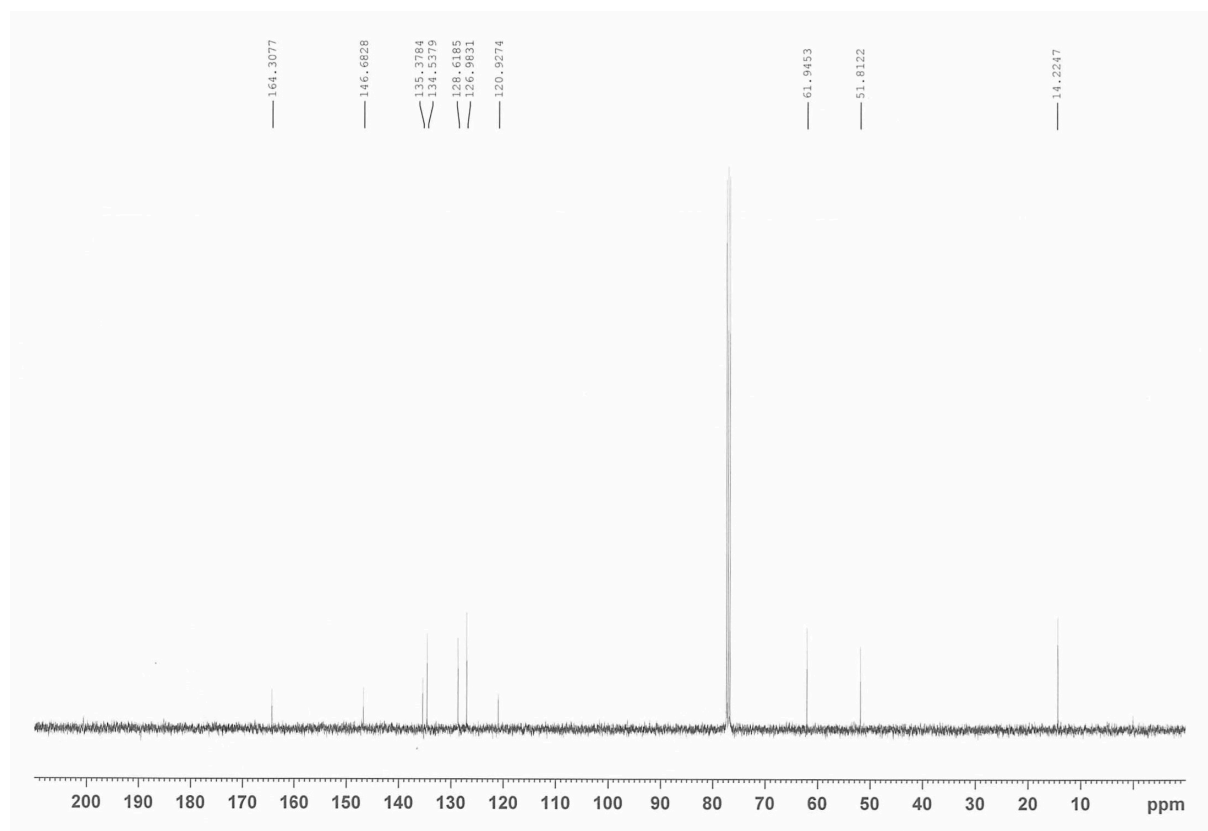

$^1\text{H}$  NMR (400 MHz) and  $^{13}\text{C}$  NMR (101 MHz) spectra of methyl 4'-methyl-[1,1'-biphenyl]-2-sulfinate (**3a**) ( $\text{CDCl}_3$ )

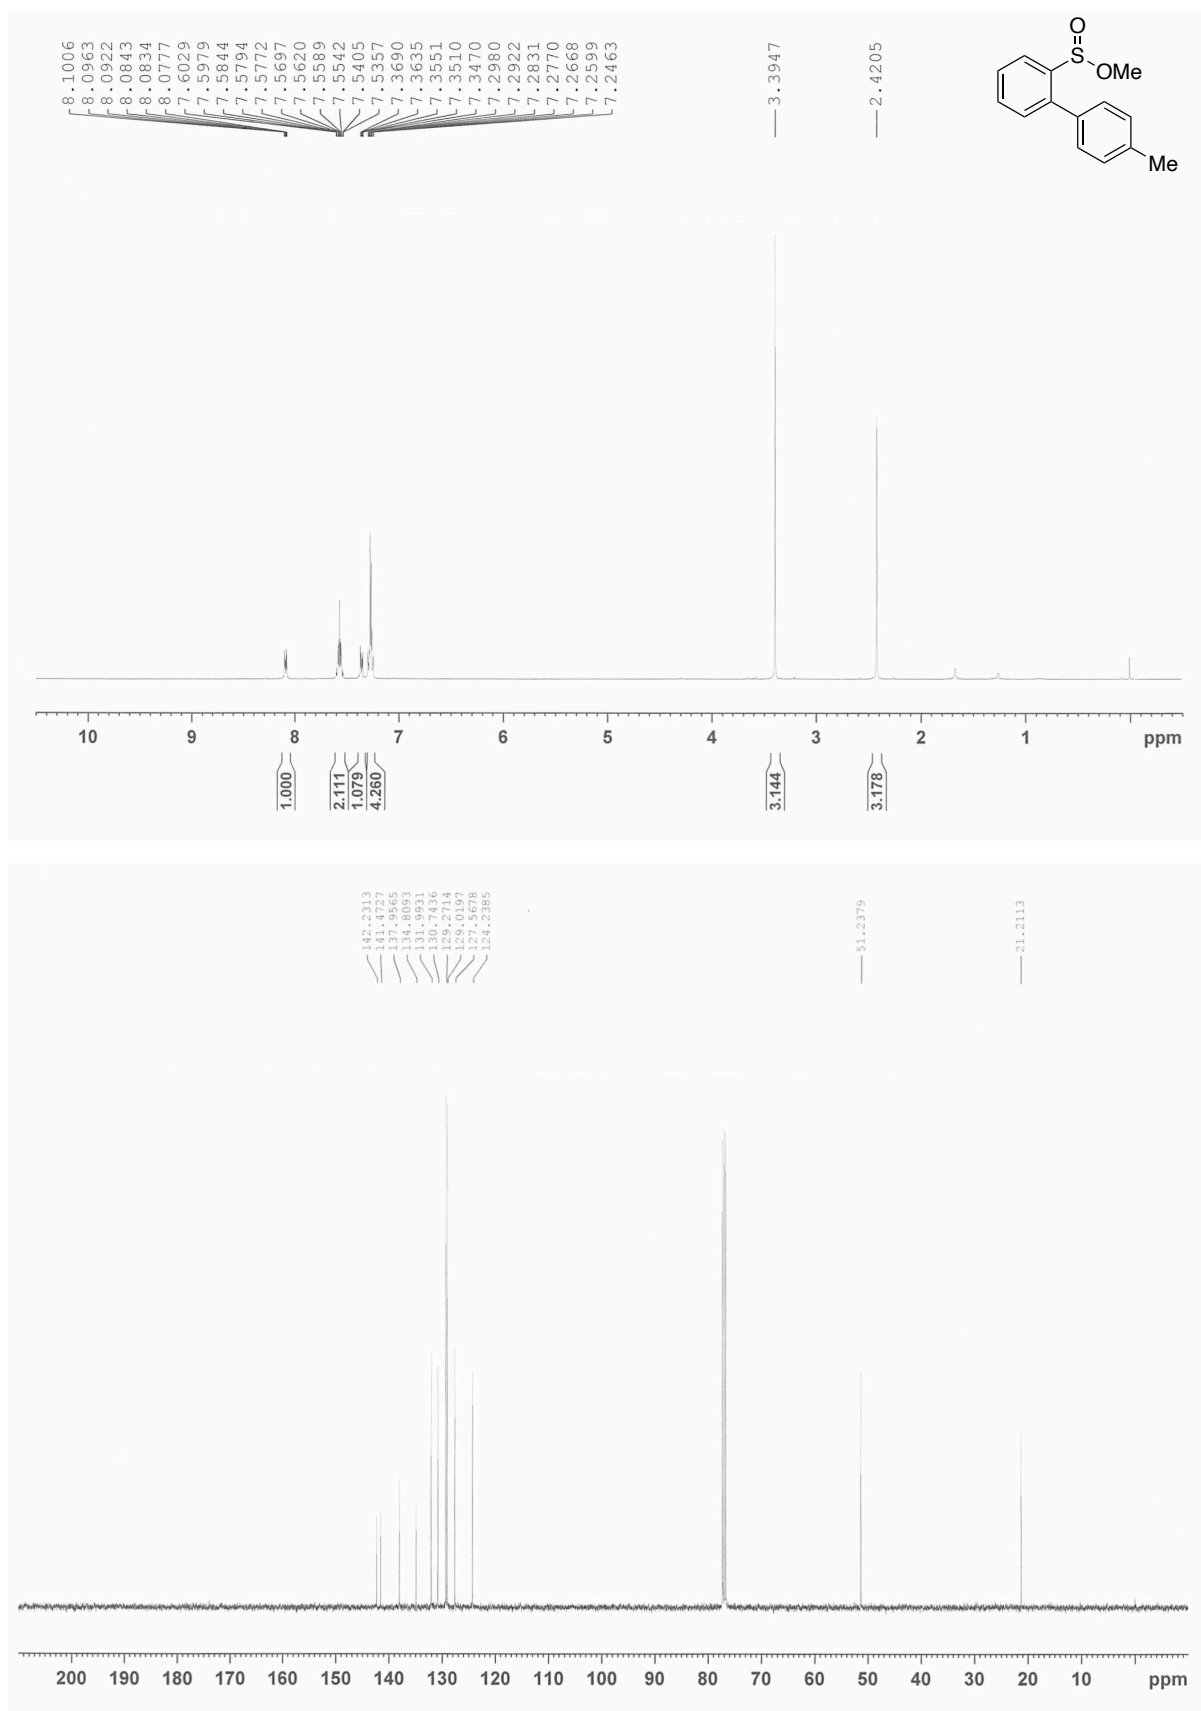

$^1\text{H}$  NMR (400 MHz) and  $^{13}\text{C}$  NMR (101 MHz) spectra of methyl 4'-fluoro-[1,1'-biphenyl]-2-sulfinate (**3b**) ( $\text{CDCl}_3$ )

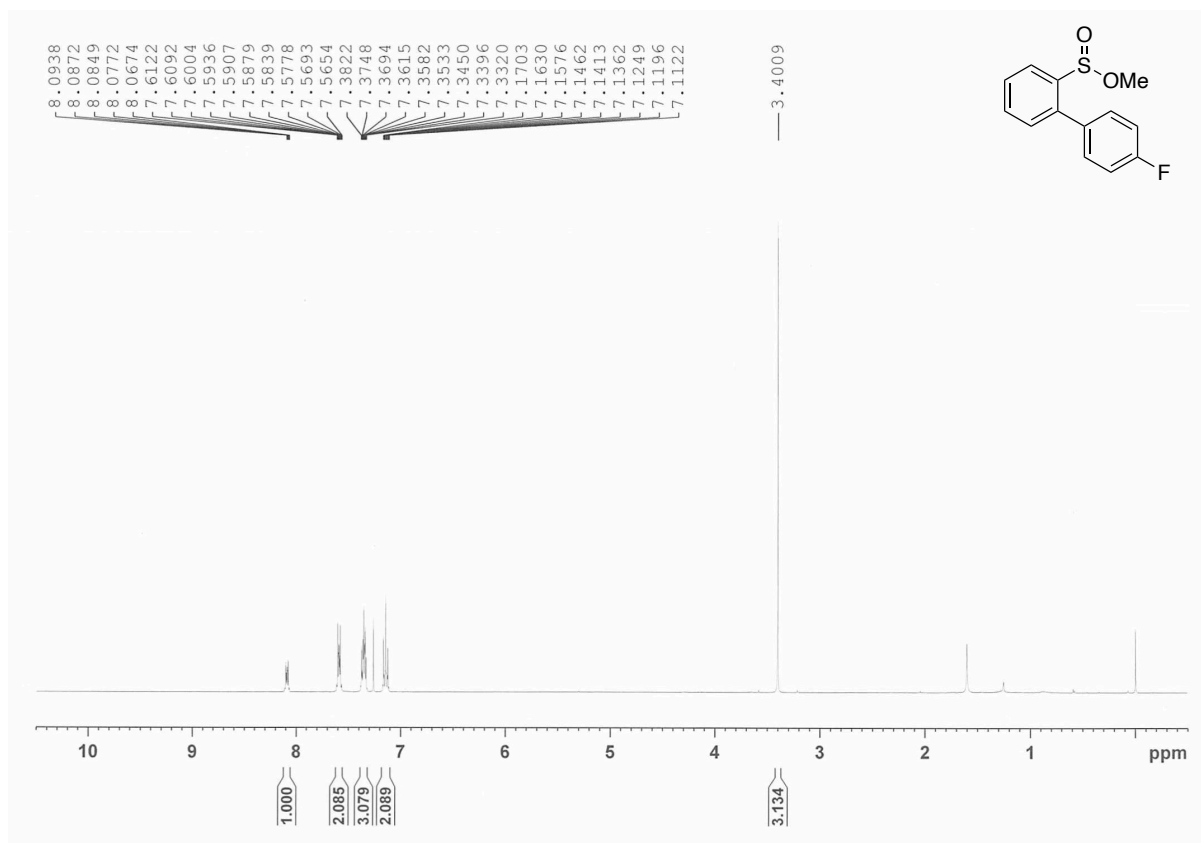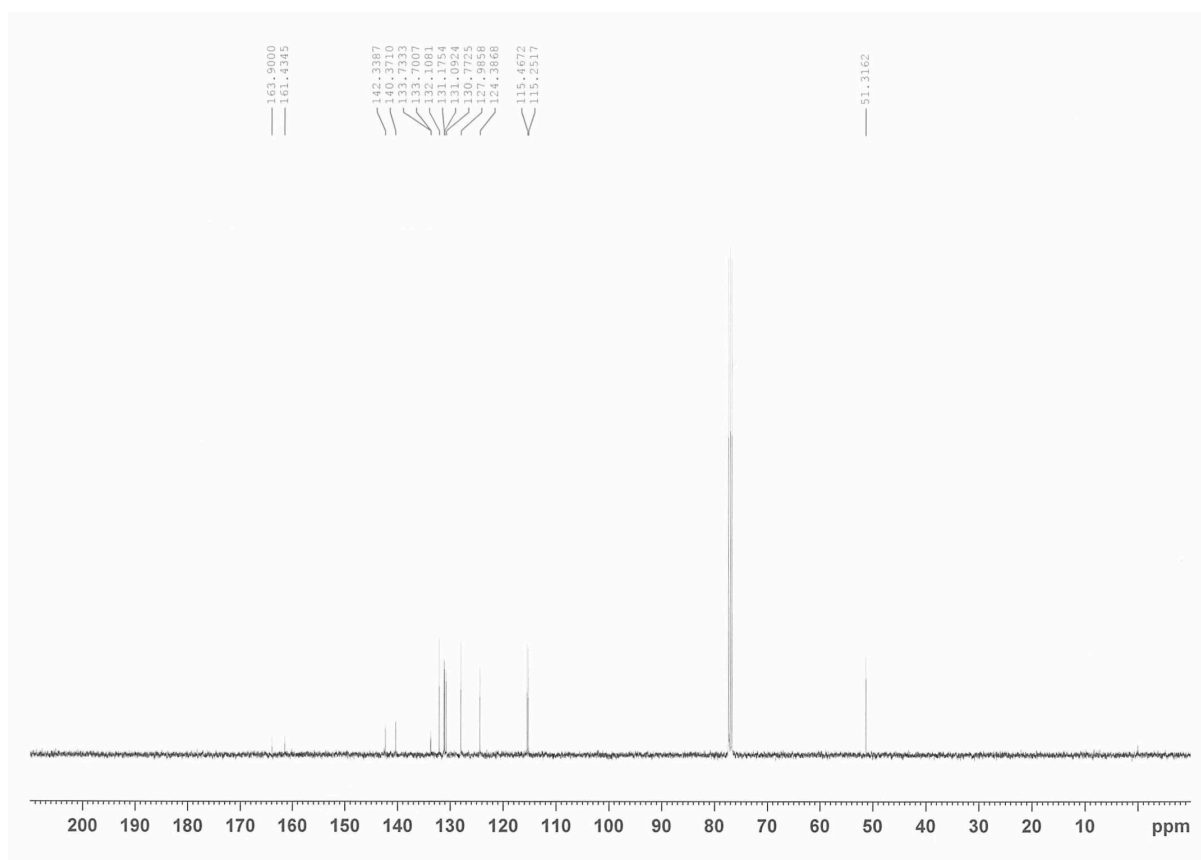



$^1\text{H}$  NMR (400 MHz) and  $^{13}\text{C}$  NMR (101 MHz) spectra of methyl 4'-chloro-[1,1'-biphenyl]-2-sulfinate (**3c**) ( $\text{CDCl}_3$ )

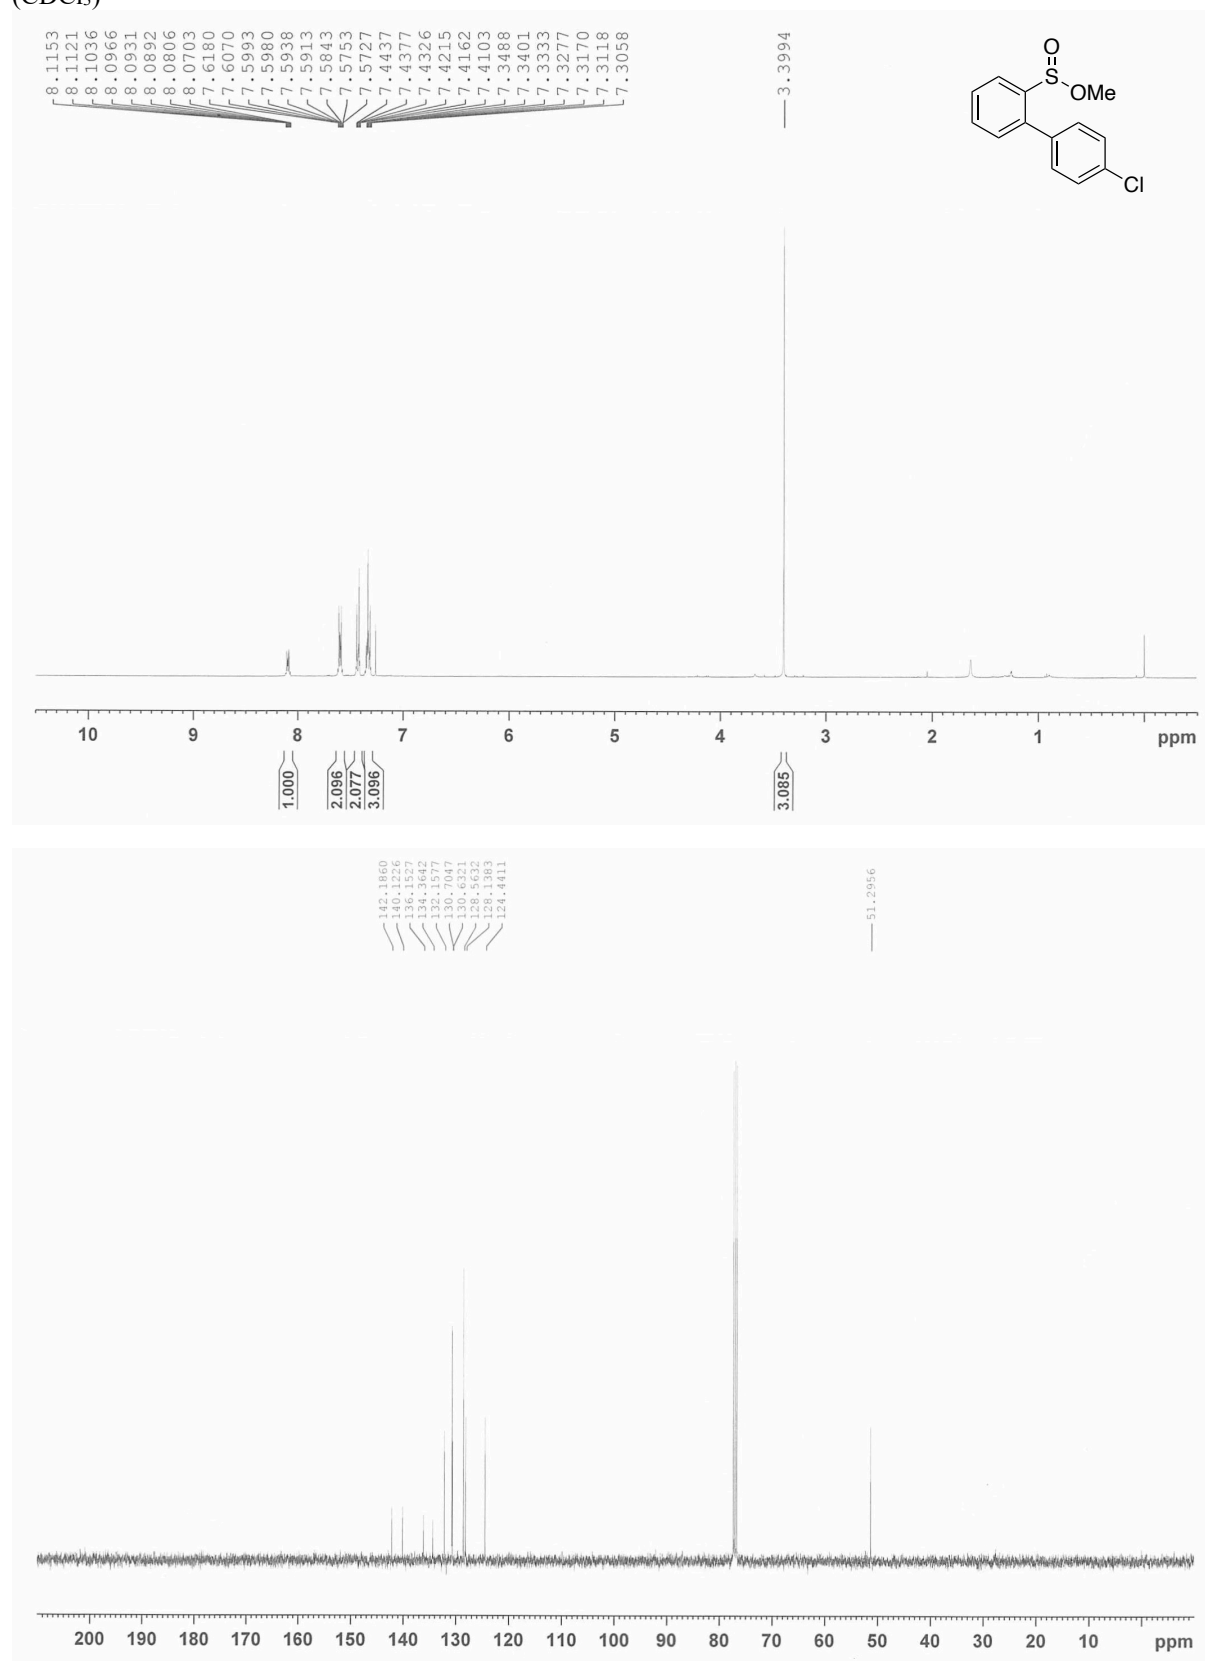

$^1\text{H}$  NMR (400 MHz) and  $^{13}\text{C}$  NMR (101 MHz) spectra of methyl 4'-methoxy-[1,1'-biphenyl]-2-sulfinate (**3d**) ( $\text{CDCl}_3$ )

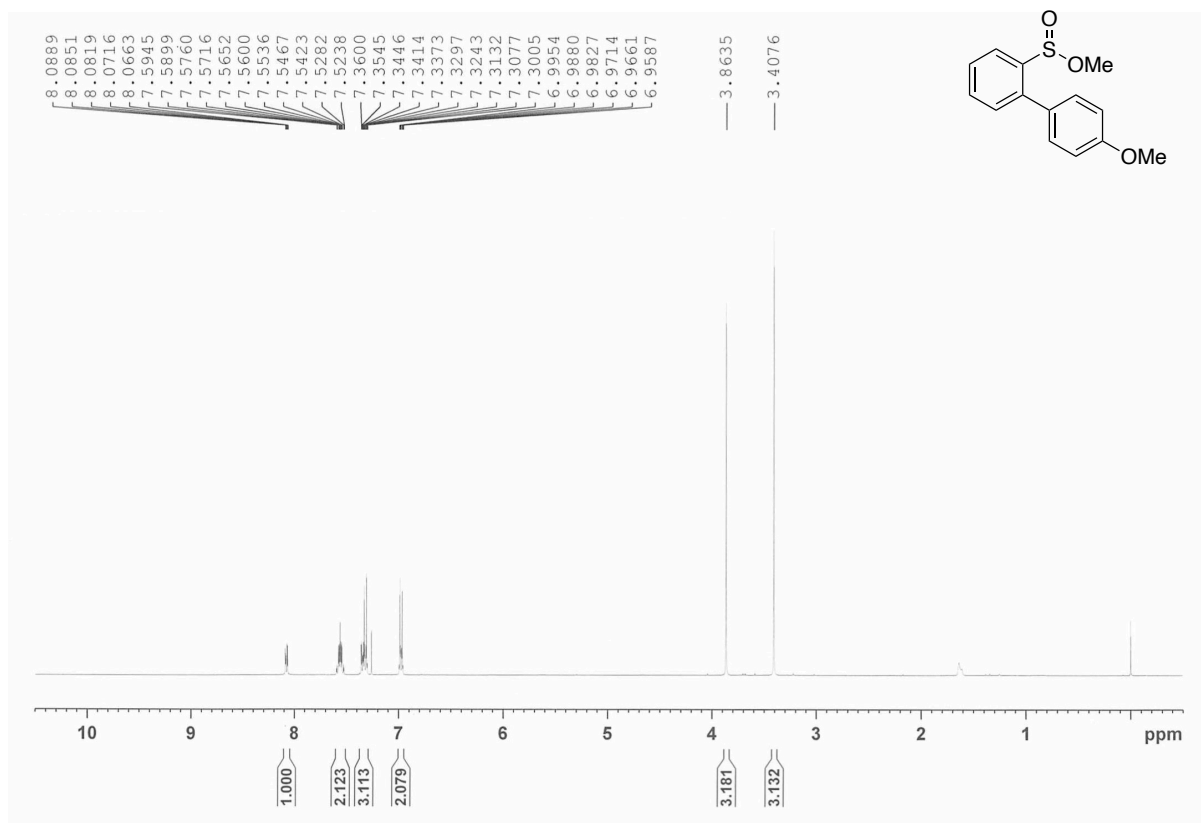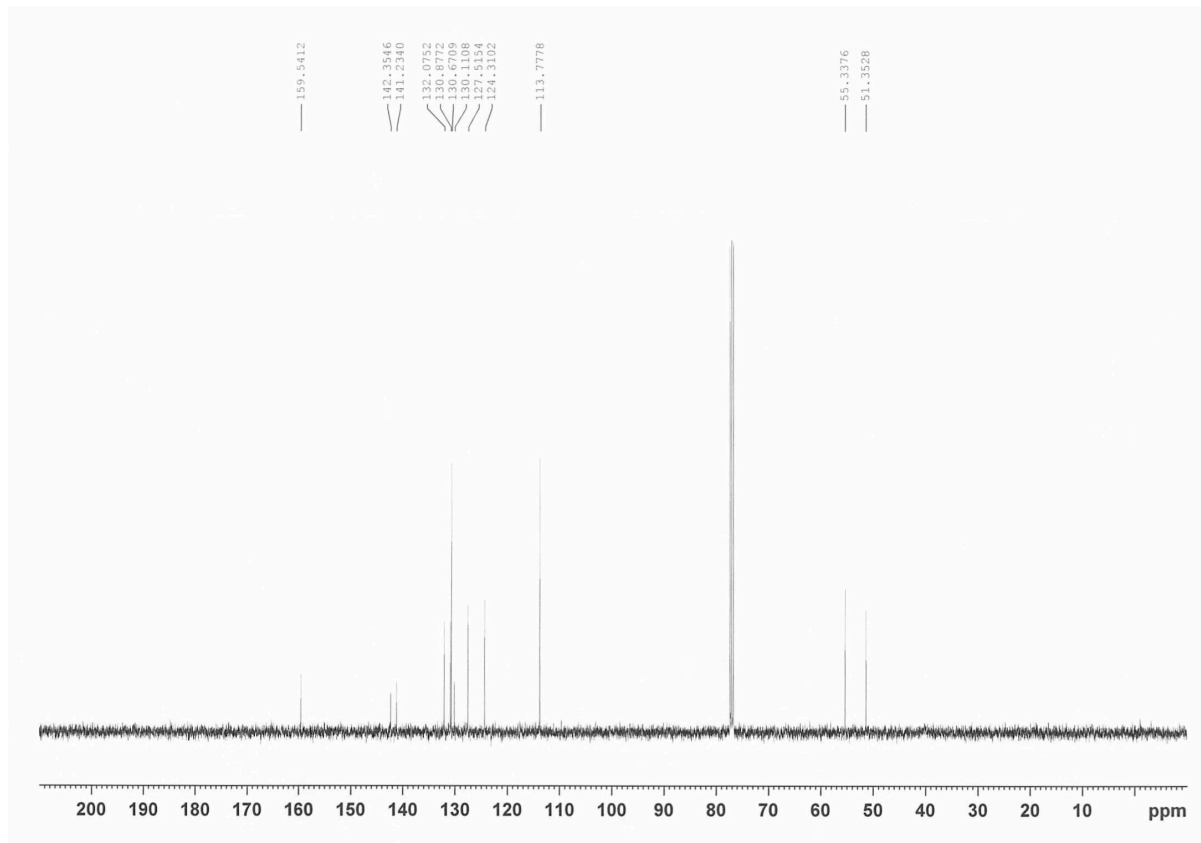

$^1\text{H}$  NMR (400 MHz) and  $^{13}\text{C}$  NMR (101 MHz) spectra of methyl 3'-methyl-[1,1'-biphenyl]-2-sulfinate (**3e**) ( $\text{CDCl}_3$ )

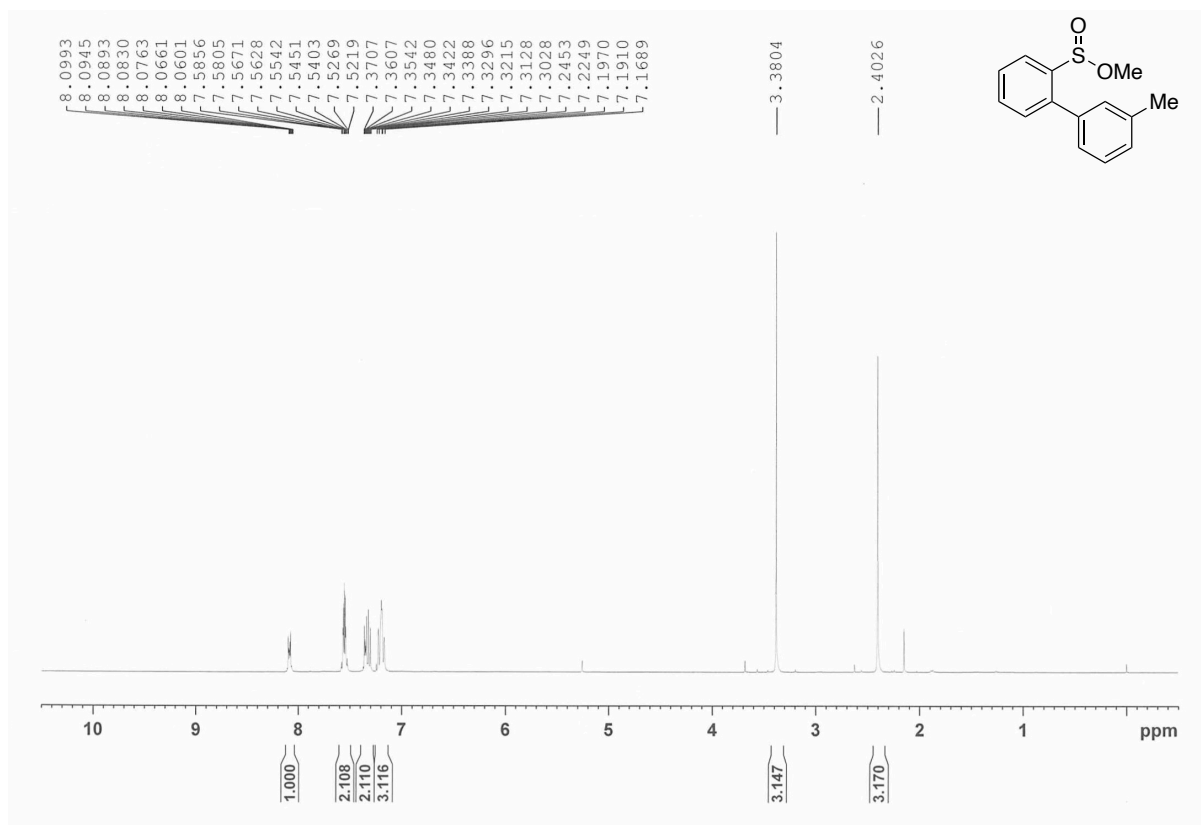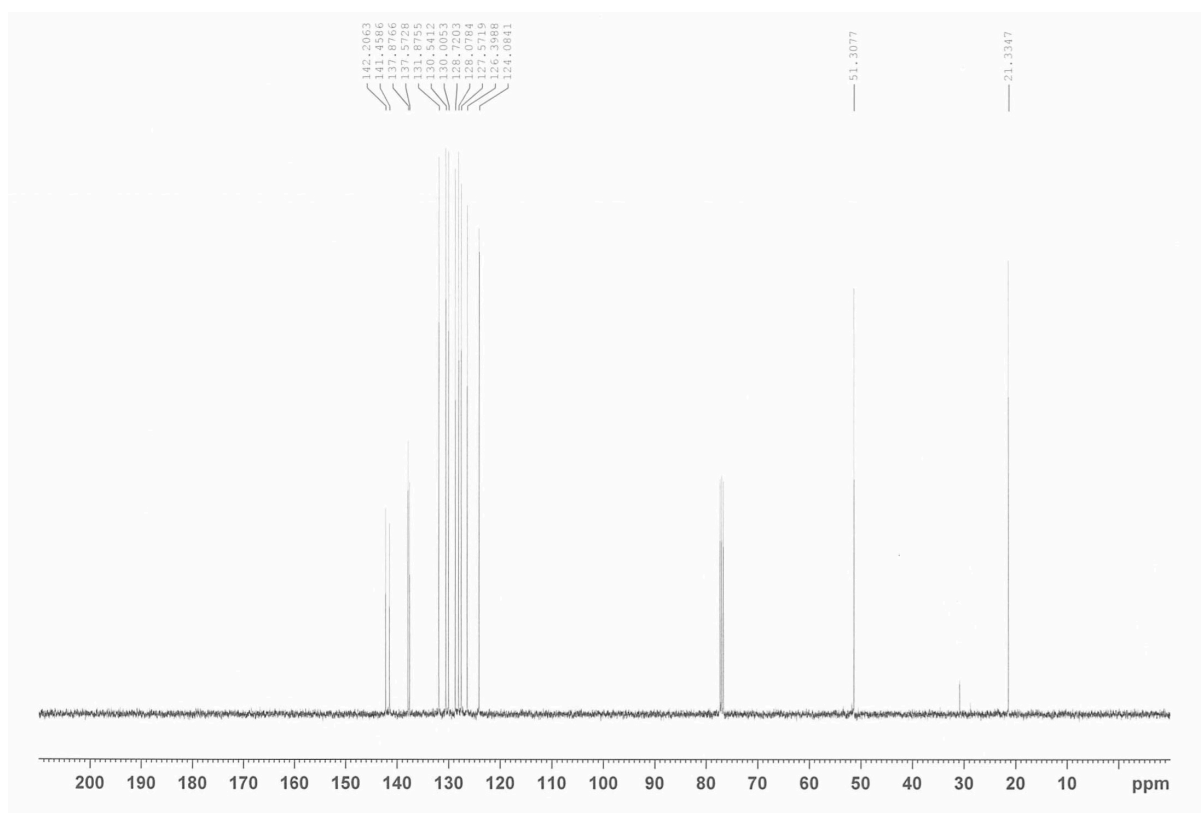

$^1\text{H}$  NMR (400 MHz) and  $^{13}\text{C}$  NMR (101 MHz) spectra of methyl 2'-methyl-[1,1'-biphenyl]-2-sulfinate (**3f**) ( $\text{CDCl}_3$ )

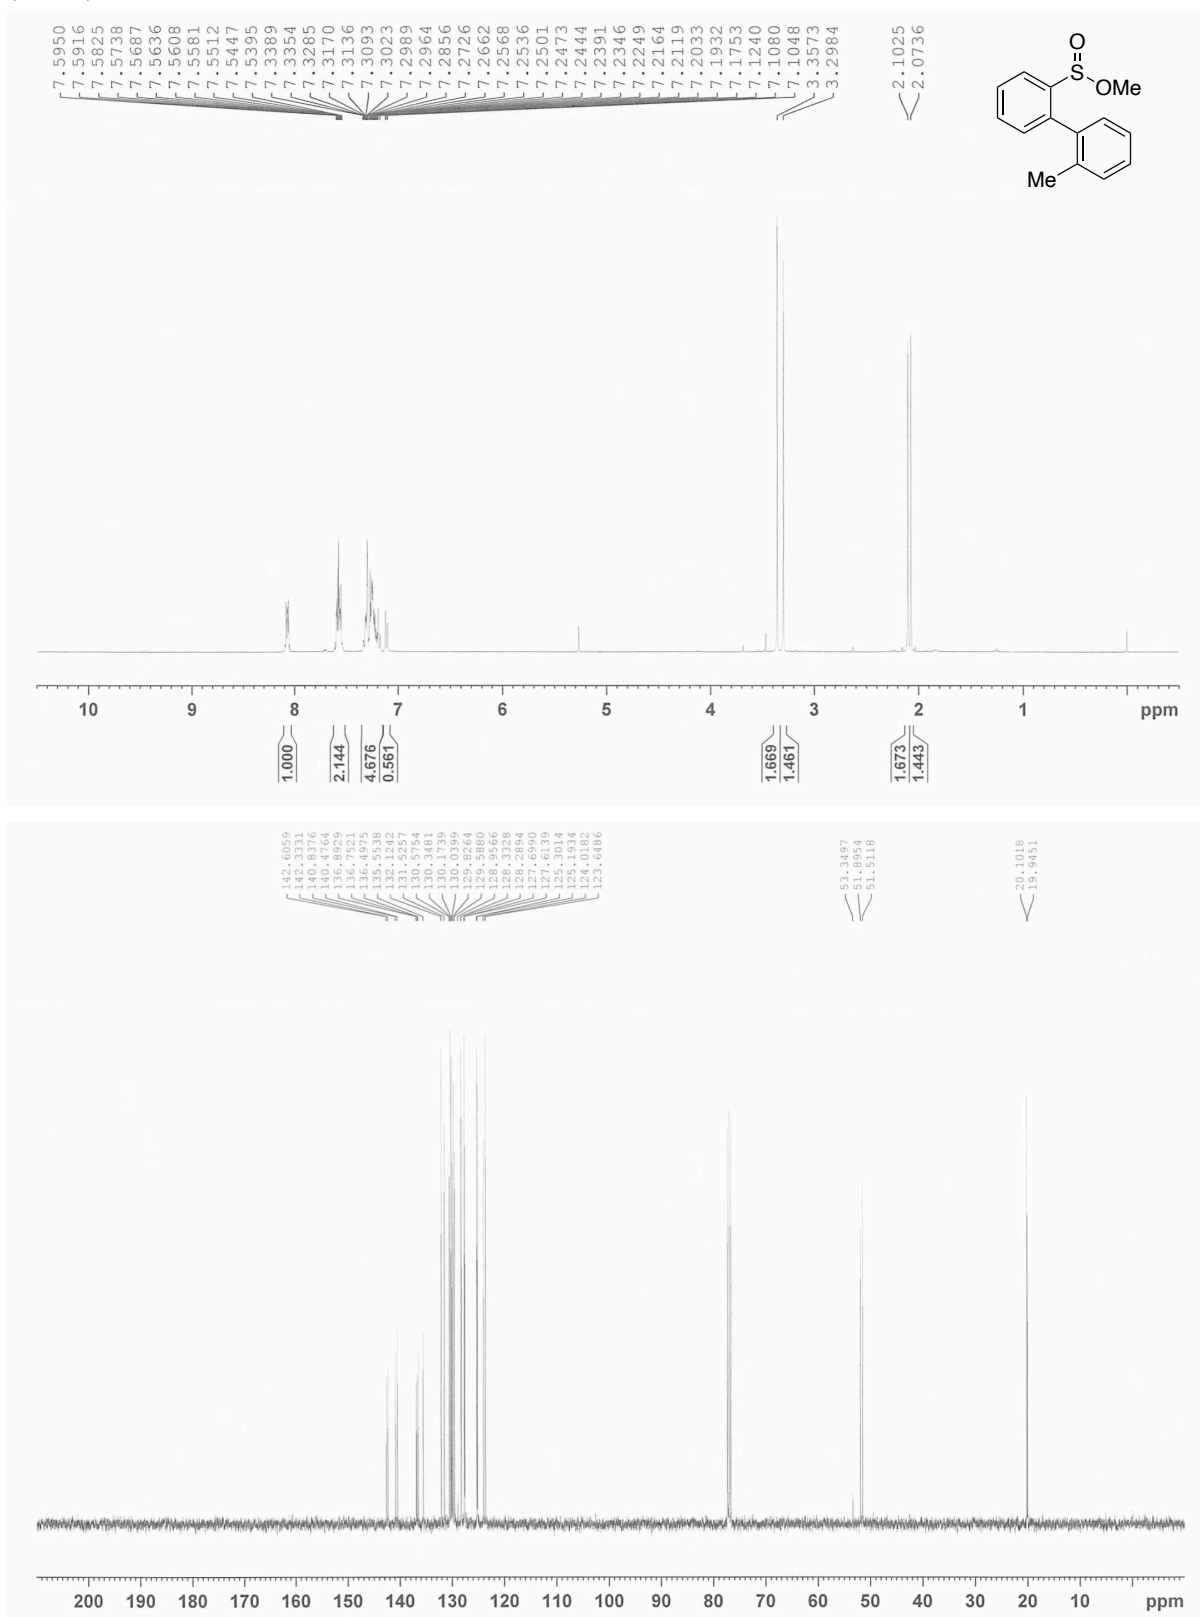

$^1\text{H}$  NMR (400 MHz) and  $^{13}\text{C}$  NMR (101 MHz) spectra of methyl 2-(naphthalen-2-yl)benzenesulfinate (**3g**) ( $\text{CDCl}_3$ )

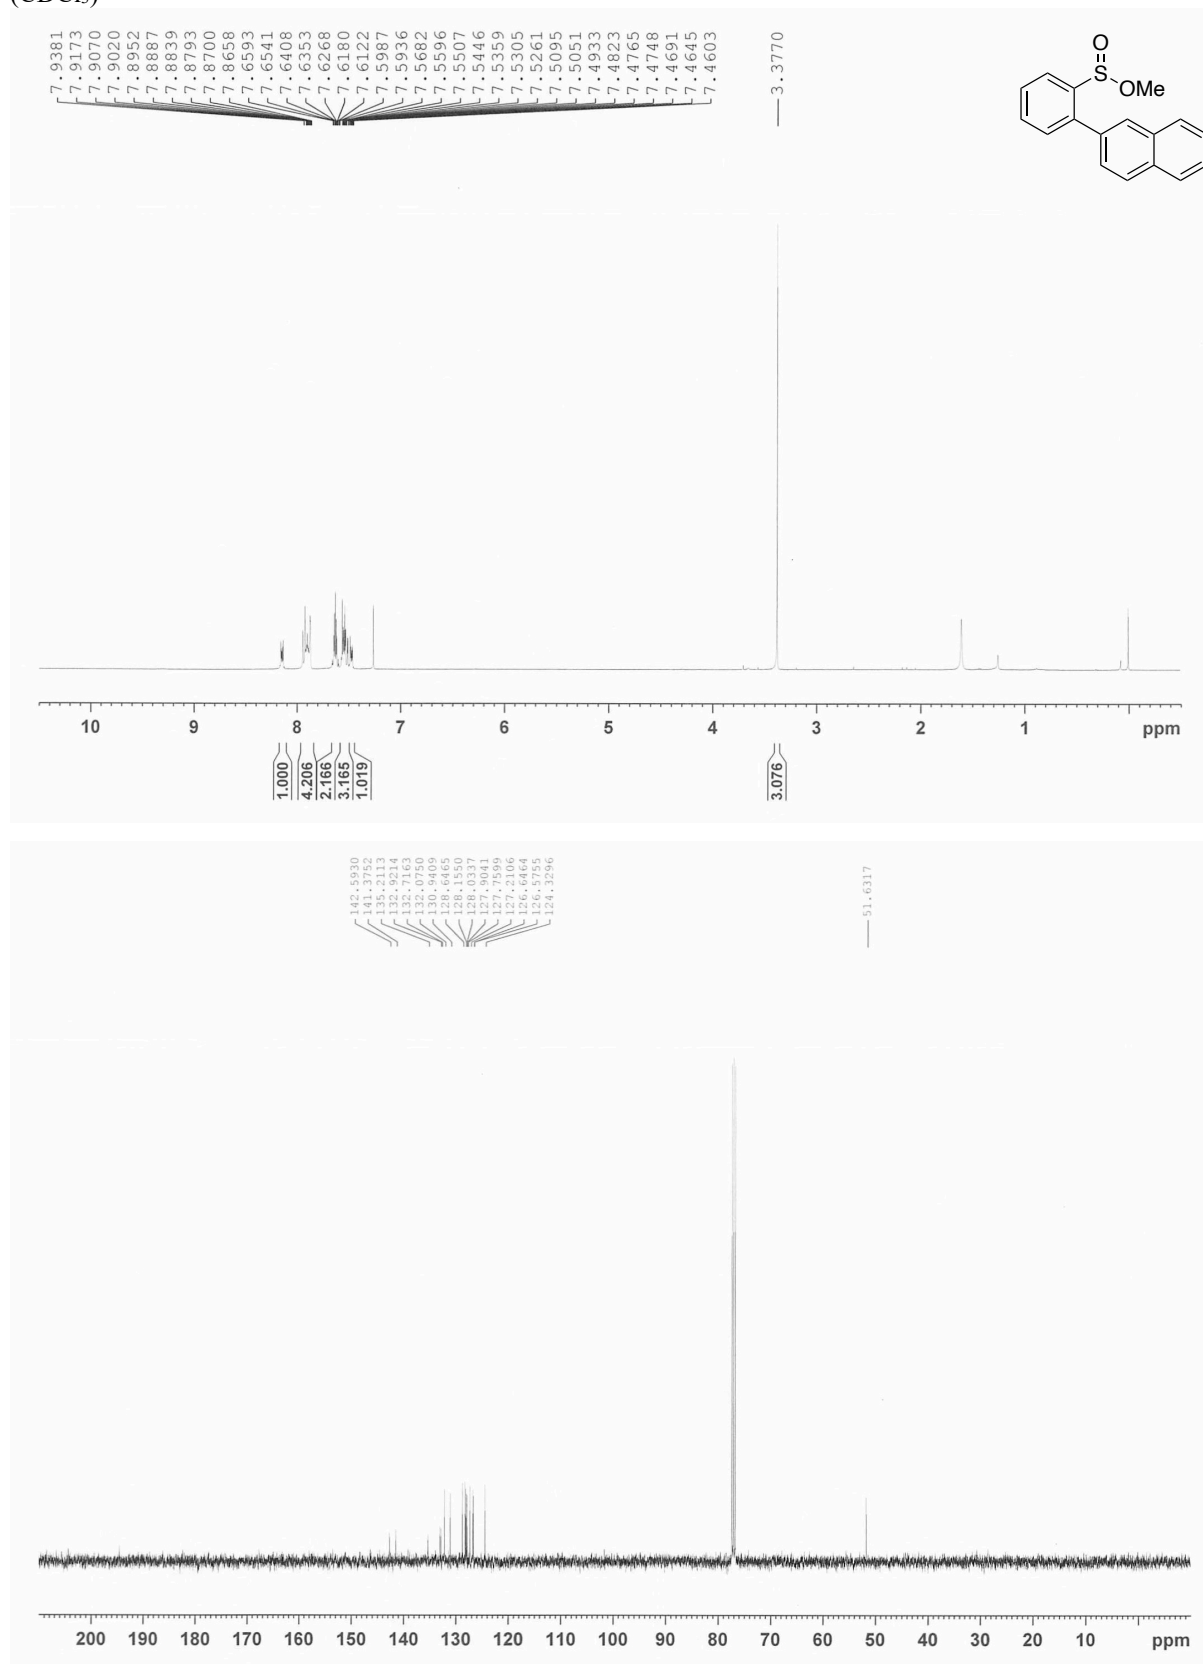

$^1\text{H}$  NMR (400 MHz) and  $^{13}\text{C}$  NMR (101 MHz) spectra of Methyl 2-(thiophen-3-yl)benzenesulfonate (**3h**) ( $\text{CDCl}_3$ )

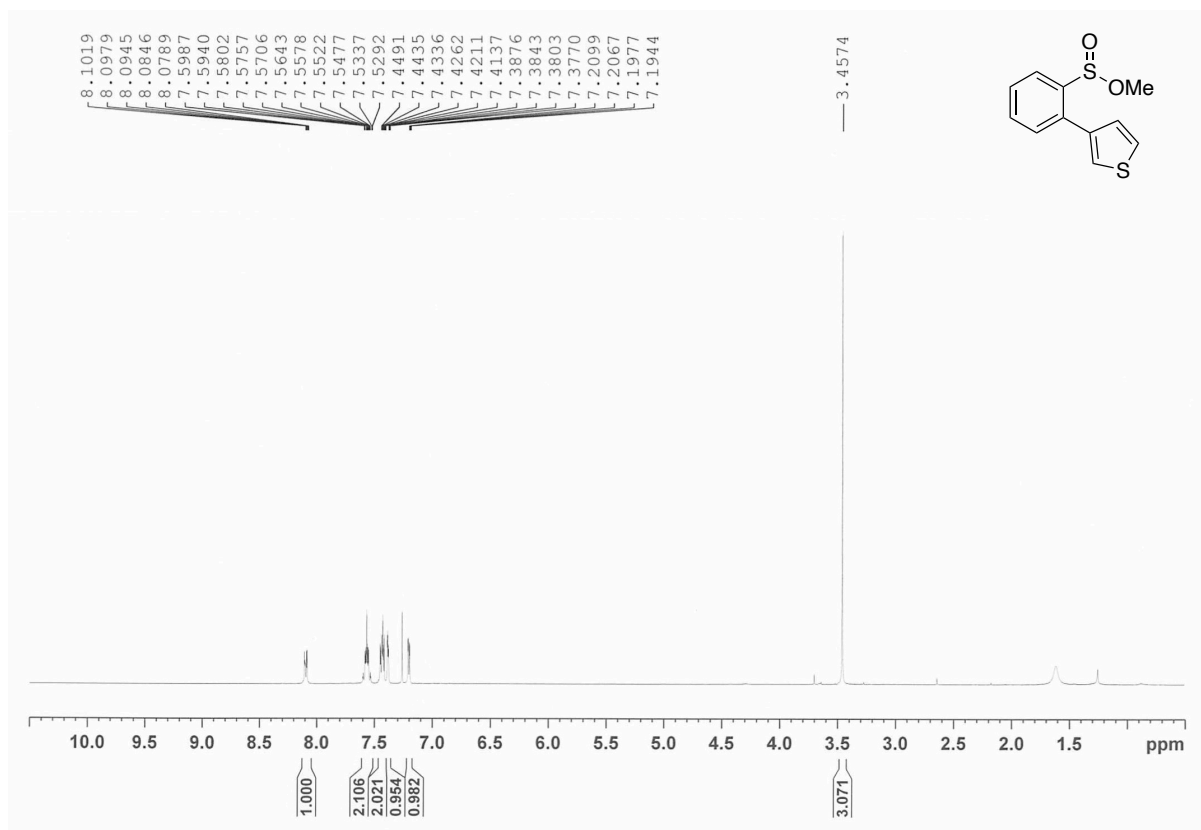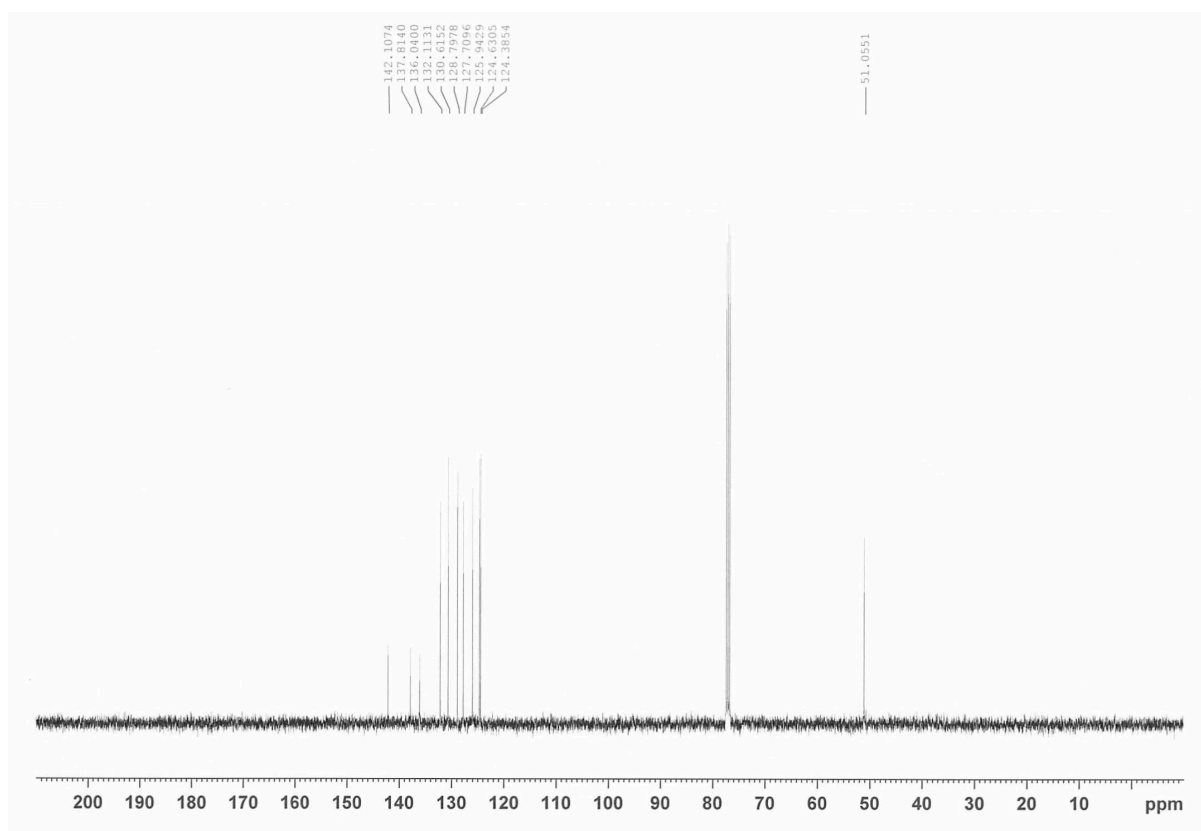

$^1\text{H}$  NMR (400 MHz) and  $^{13}\text{C}$  NMR (101 MHz) spectra of methyl 2-(thiophen-2-yl)benzenesulfinate (**3i**) ( $\text{CDCl}_3$ )

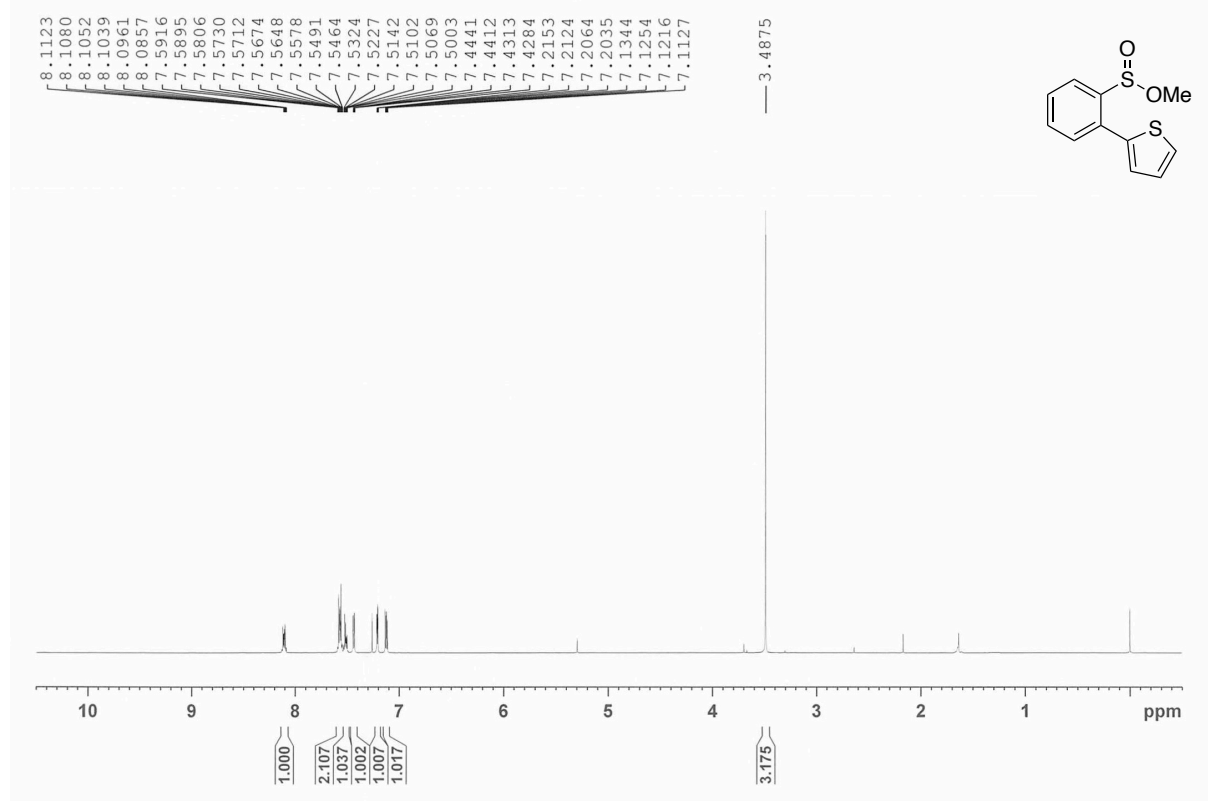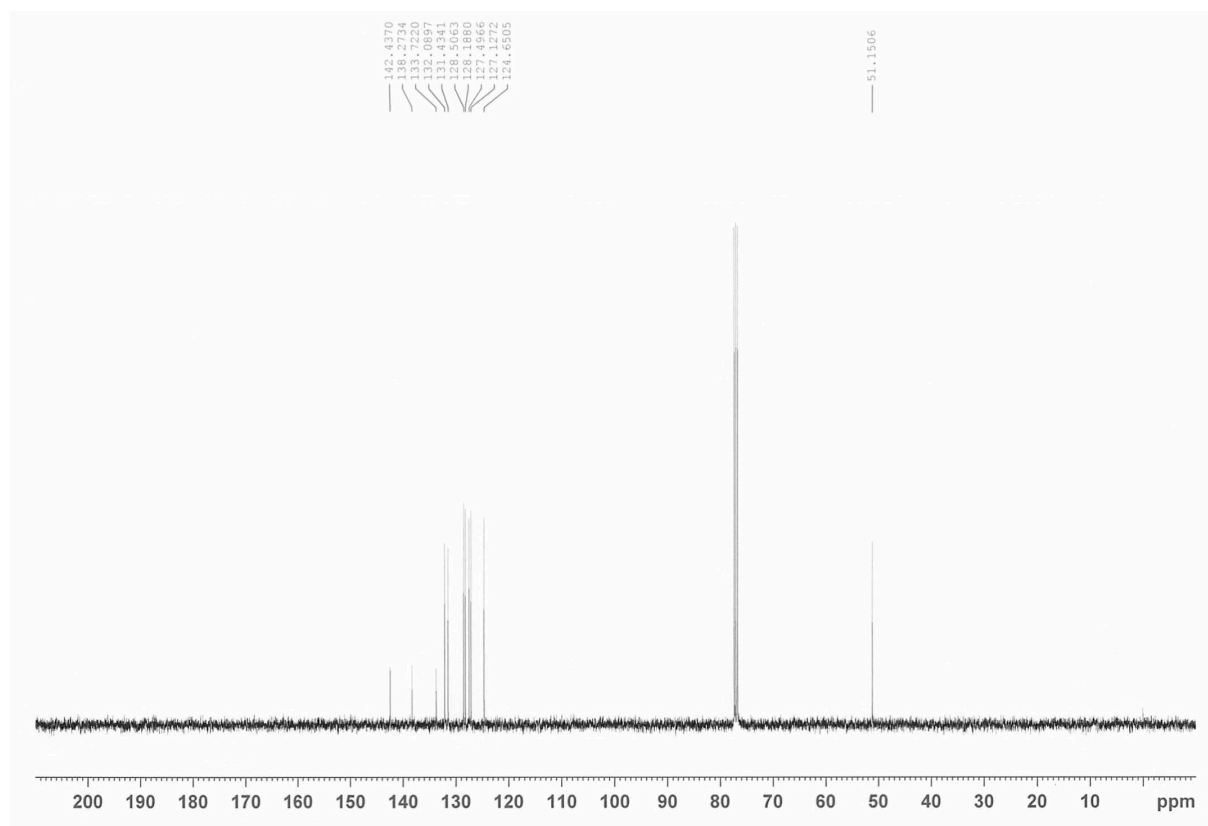

$^1\text{H}$  NMR (400 MHz) and  $^{13}\text{C}$  NMR (101 MHz) spectra of methyl 2-(furan-3-yl)benzenesulfinate (**3j**) ( $\text{CDCl}_3$ )

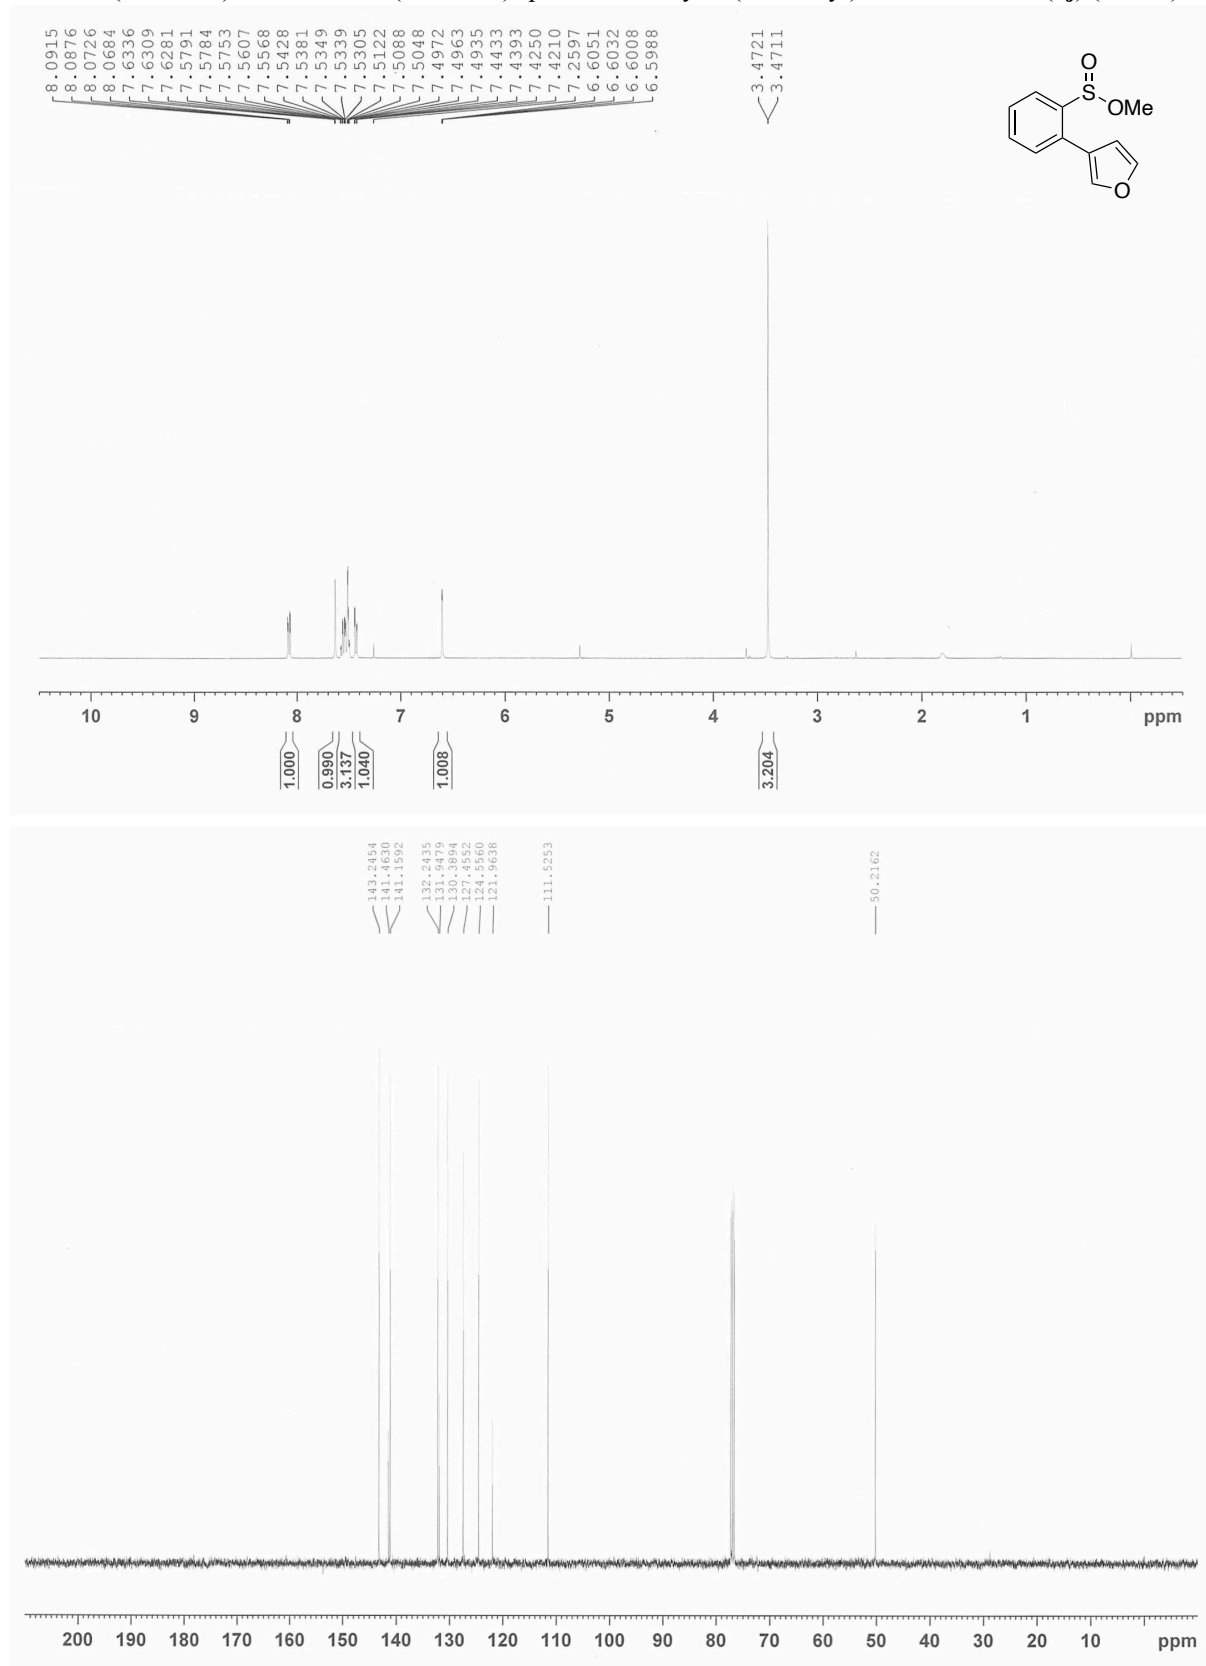



$^1\text{H}$  NMR (400 MHz) and  $^{13}\text{C}$  NMR (101 MHz) spectra of methyl 2-(benzofuran-2-yl)benzenesulfinate (**3k**) ( $\text{CDCl}_3$ )

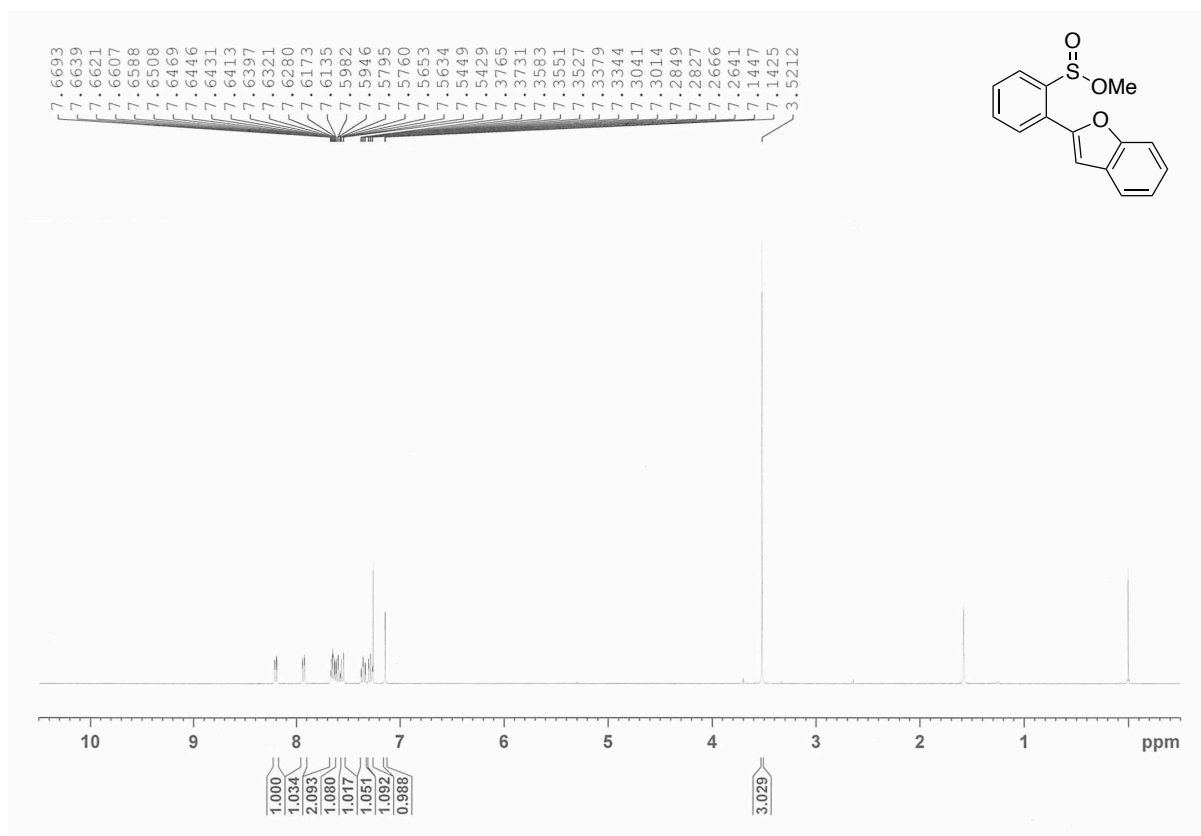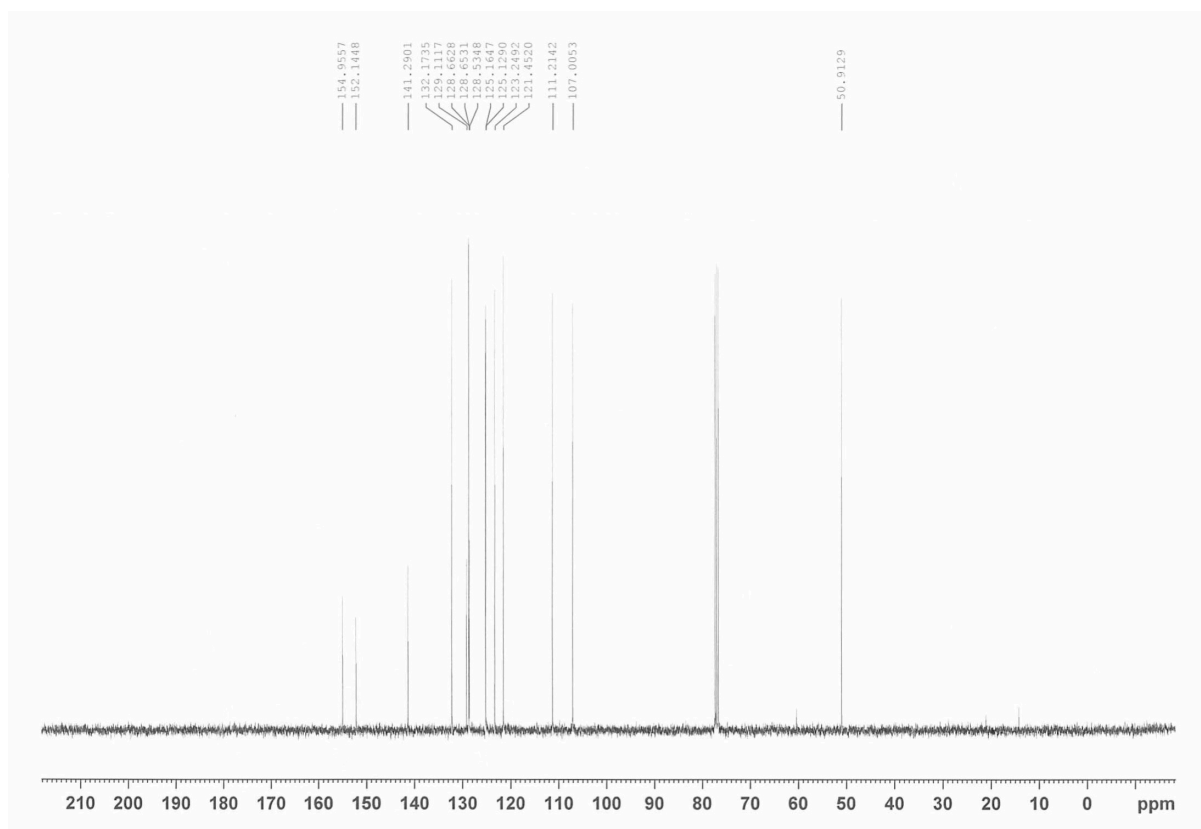

$^1\text{H}$  NMR (400 MHz) and  $^{13}\text{C}$  NMR (101 MHz) spectra of methyl 4',5-dimethyl-[1,1'-biphenyl]-2-sulfinate (**31**) ( $\text{CDCl}_3$ )

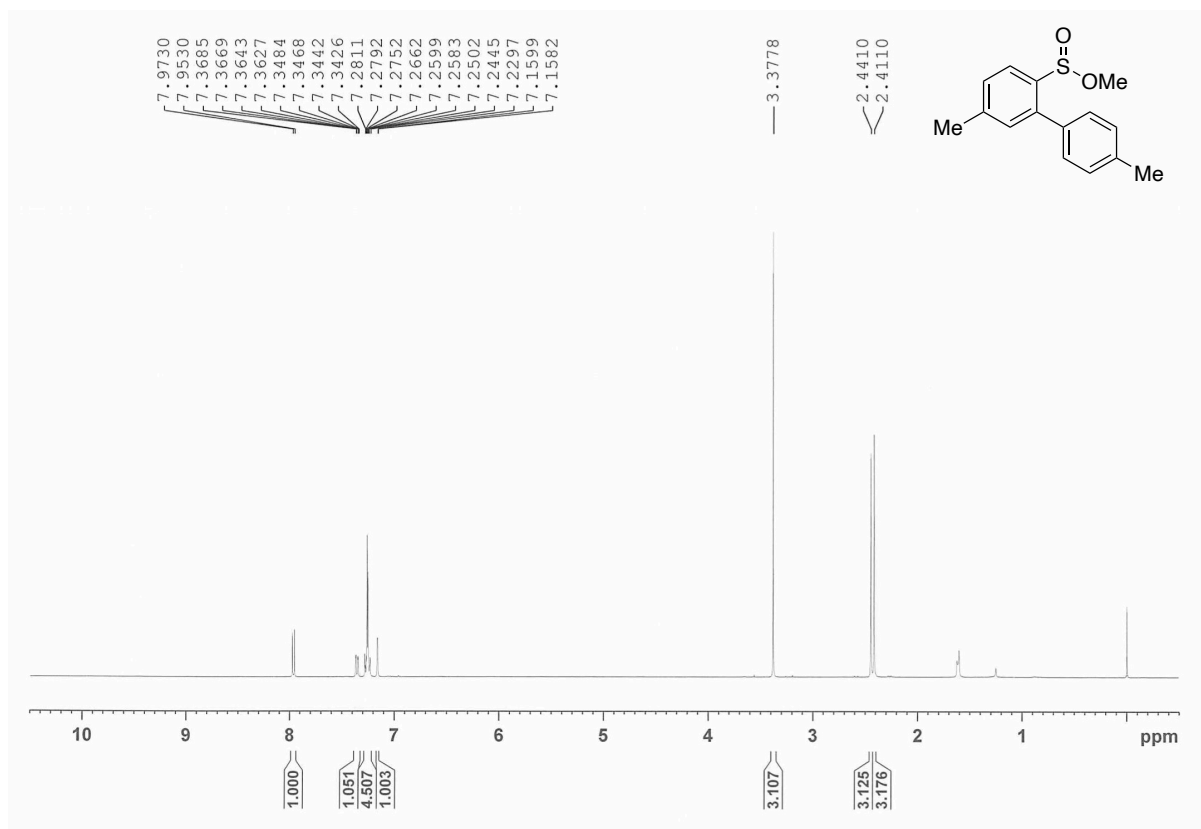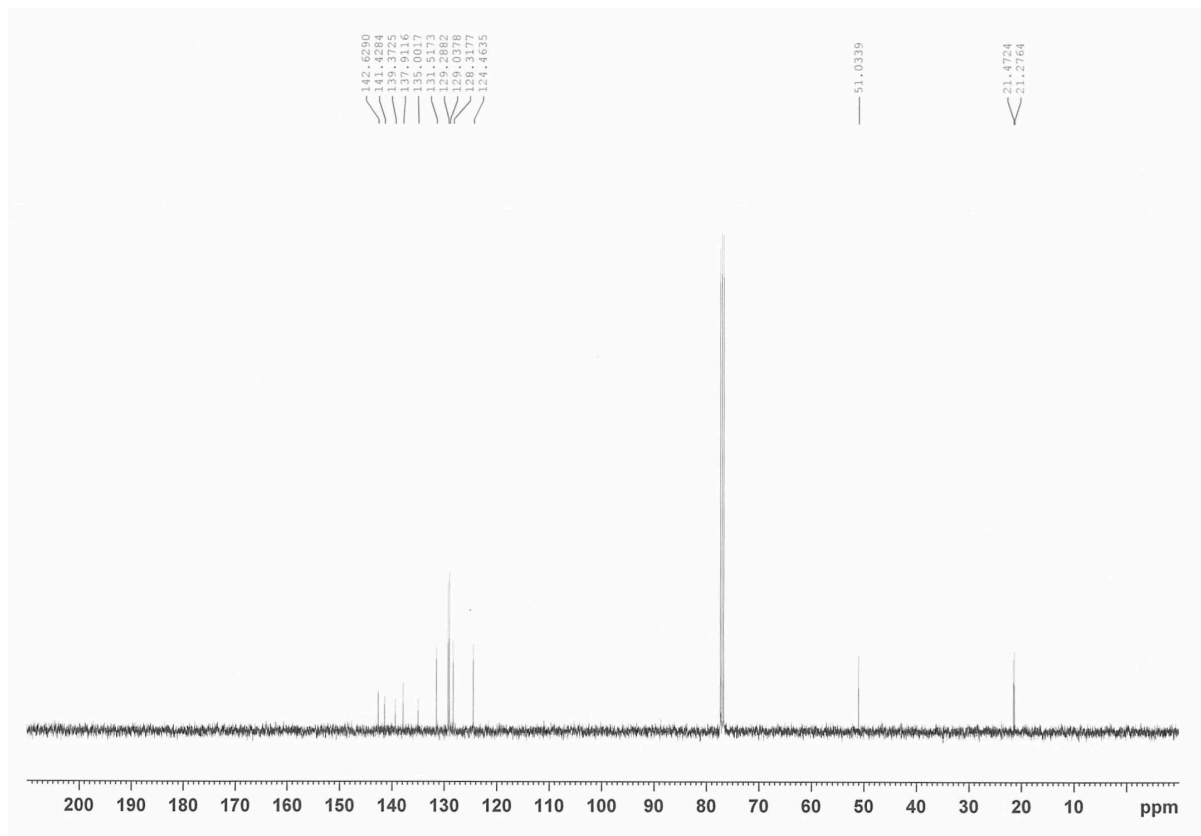

$^1\text{H}$  NMR (400 MHz) and  $^{13}\text{C}$  NMR (101 MHz) spectra of methyl 3,4',5-trimethyl-[1,1'-biphenyl]-2-sulfinate (**3m**) ( $\text{CDCl}_3$ )

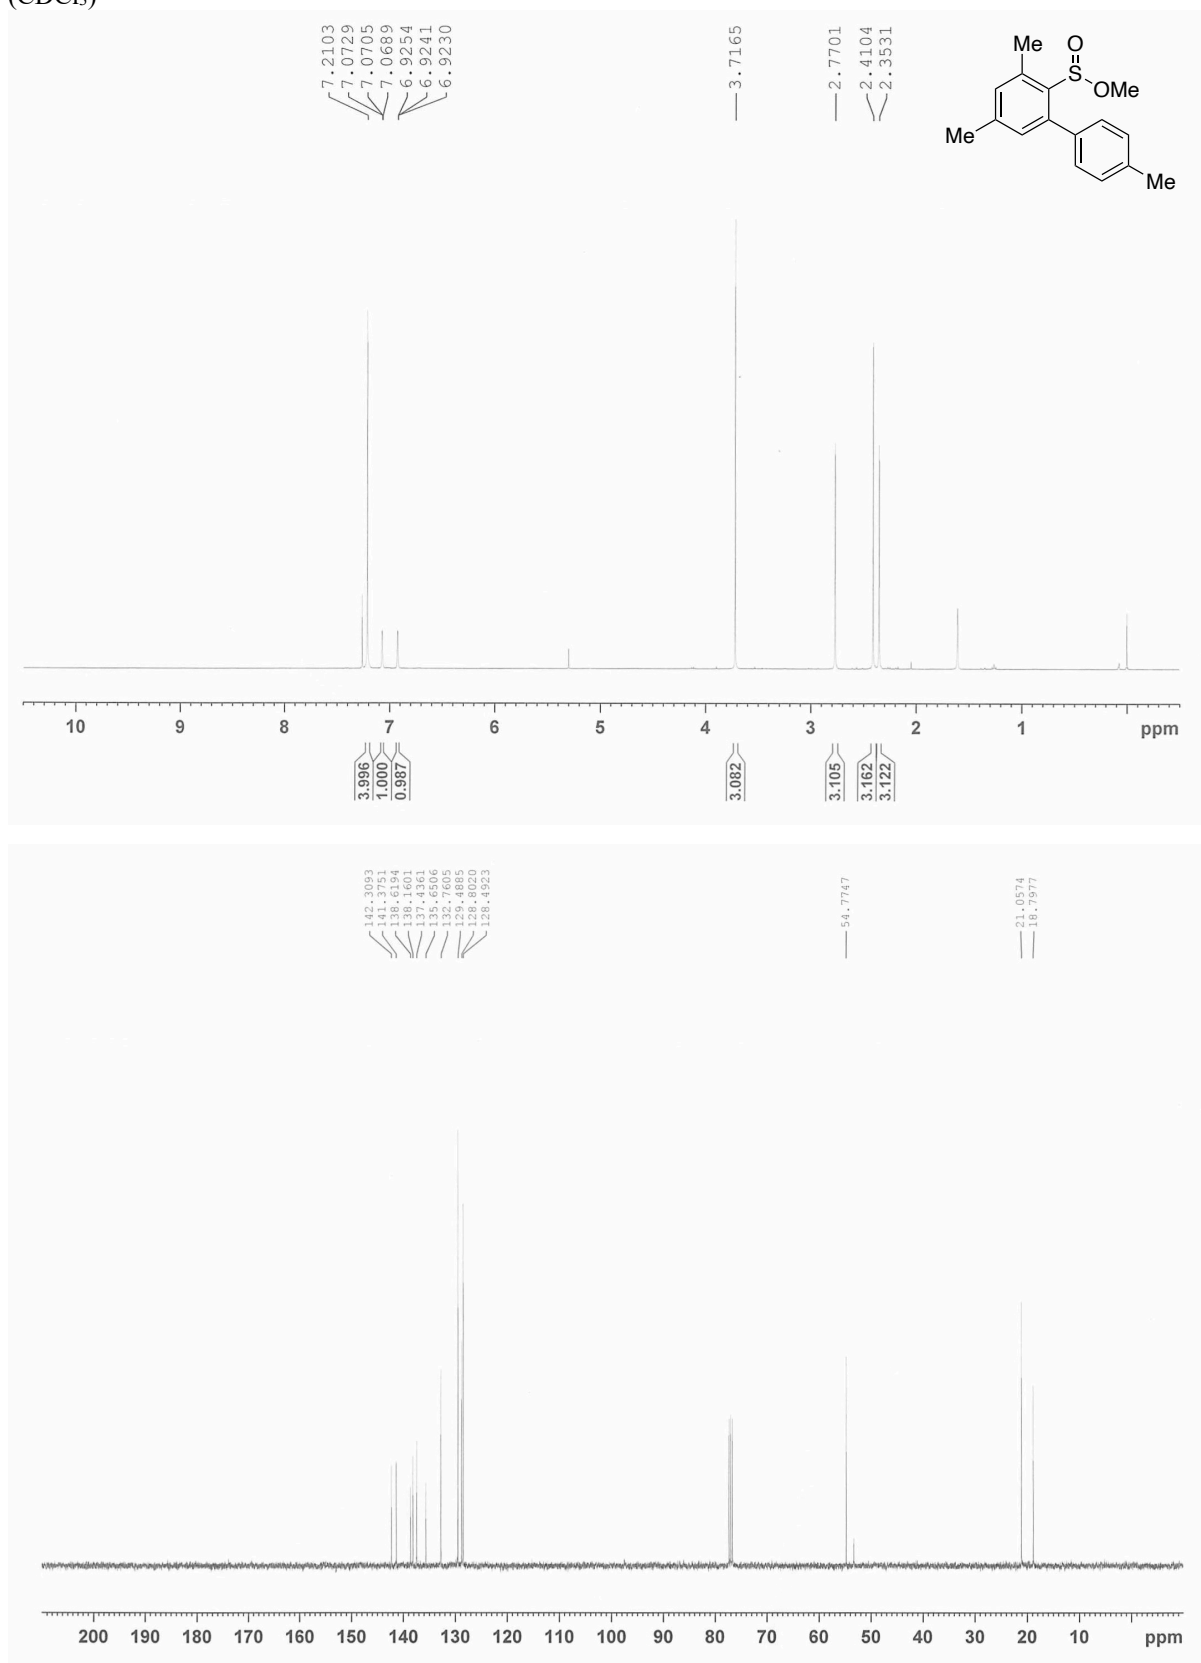

$^1\text{H}$  NMR (400 MHz) and  $^{13}\text{C}$  NMR (101 MHz) spectra of methyl 6-(*p*-tolyl)benzo[*d*][1,3]dioxole-5-sulfinate (**3n**) ( $\text{CDCl}_3$ )

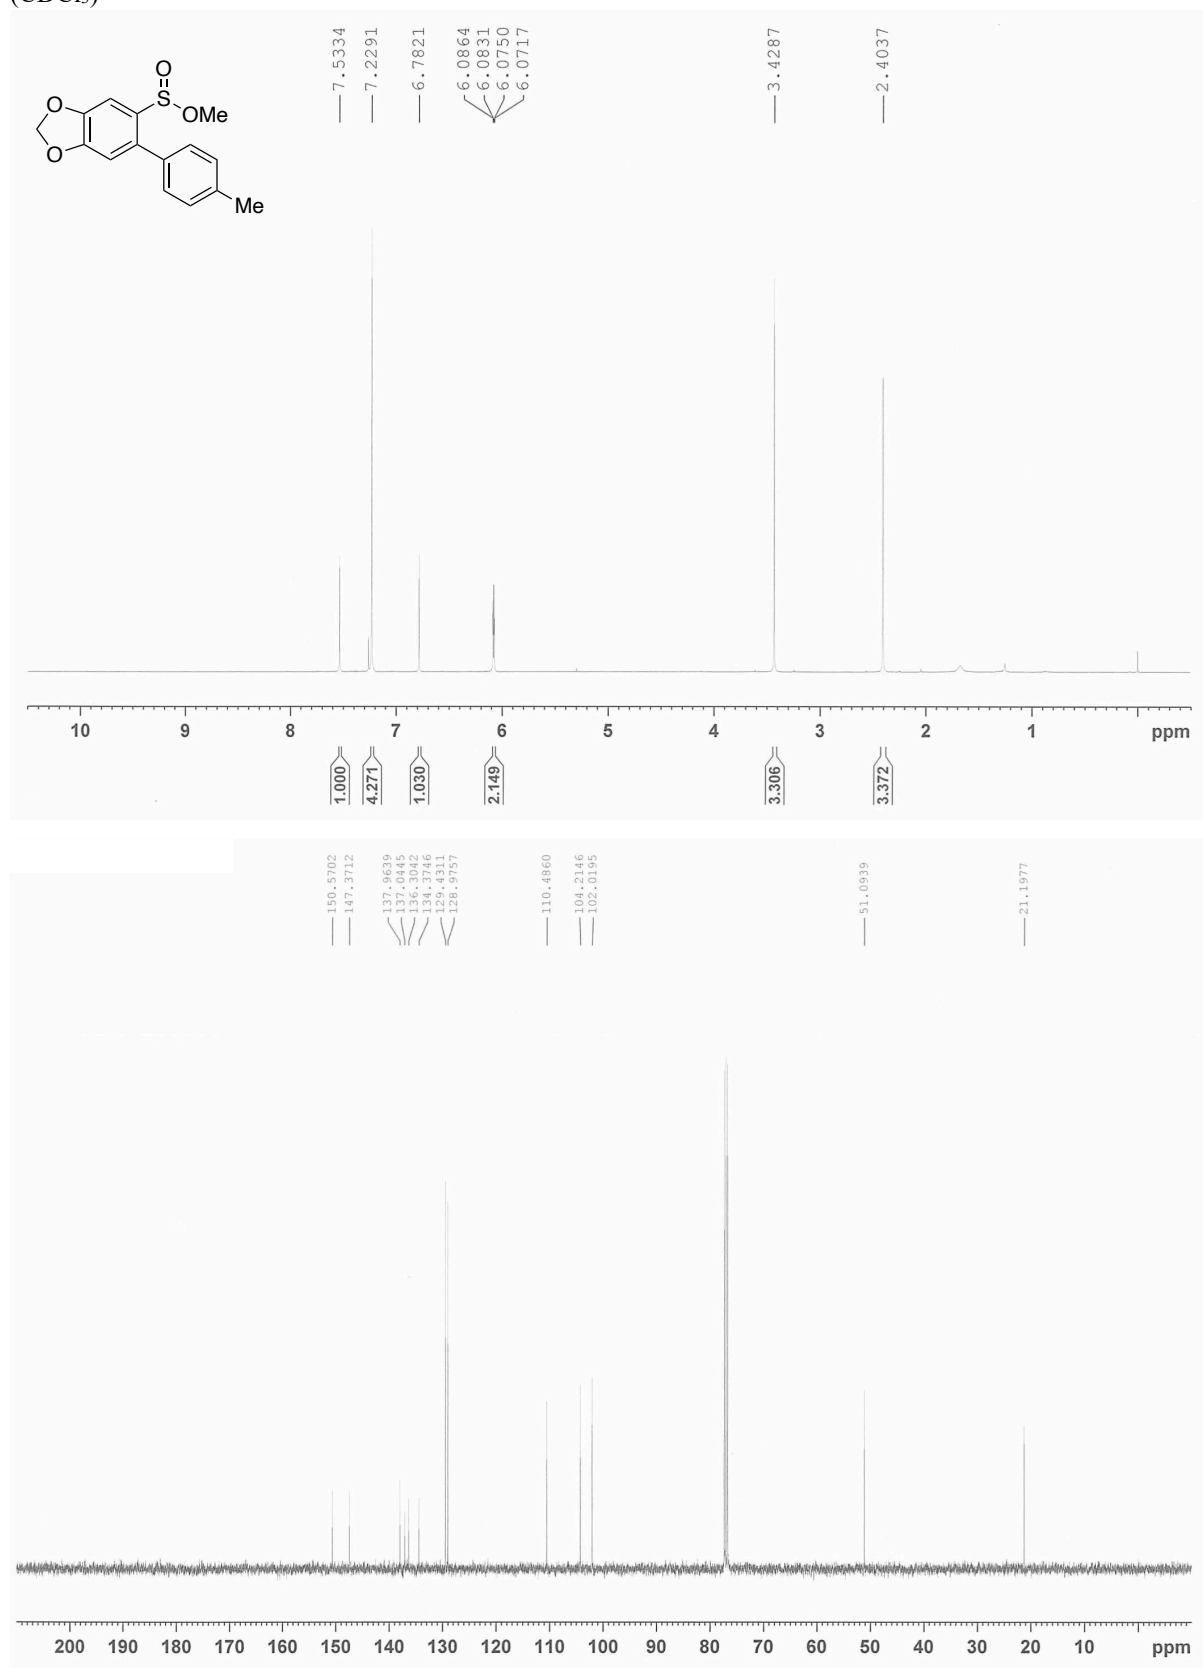

$^1\text{H}$  NMR (400 MHz) and  $^{13}\text{C}$  NMR (101 MHz) spectra of methyl 5-chloro-4'-methyl-1,1'-biphenyl-2-sulfinate (**3o**) ( $\text{CDCl}_3$ )

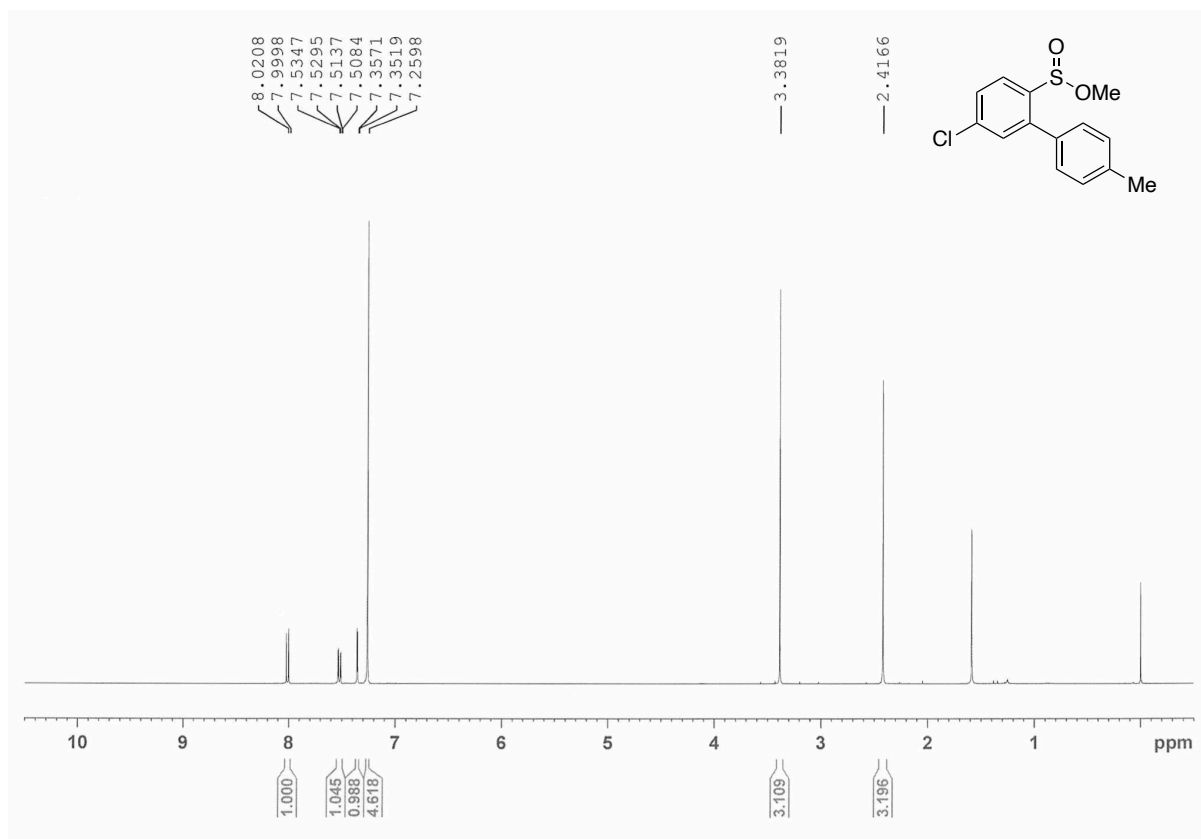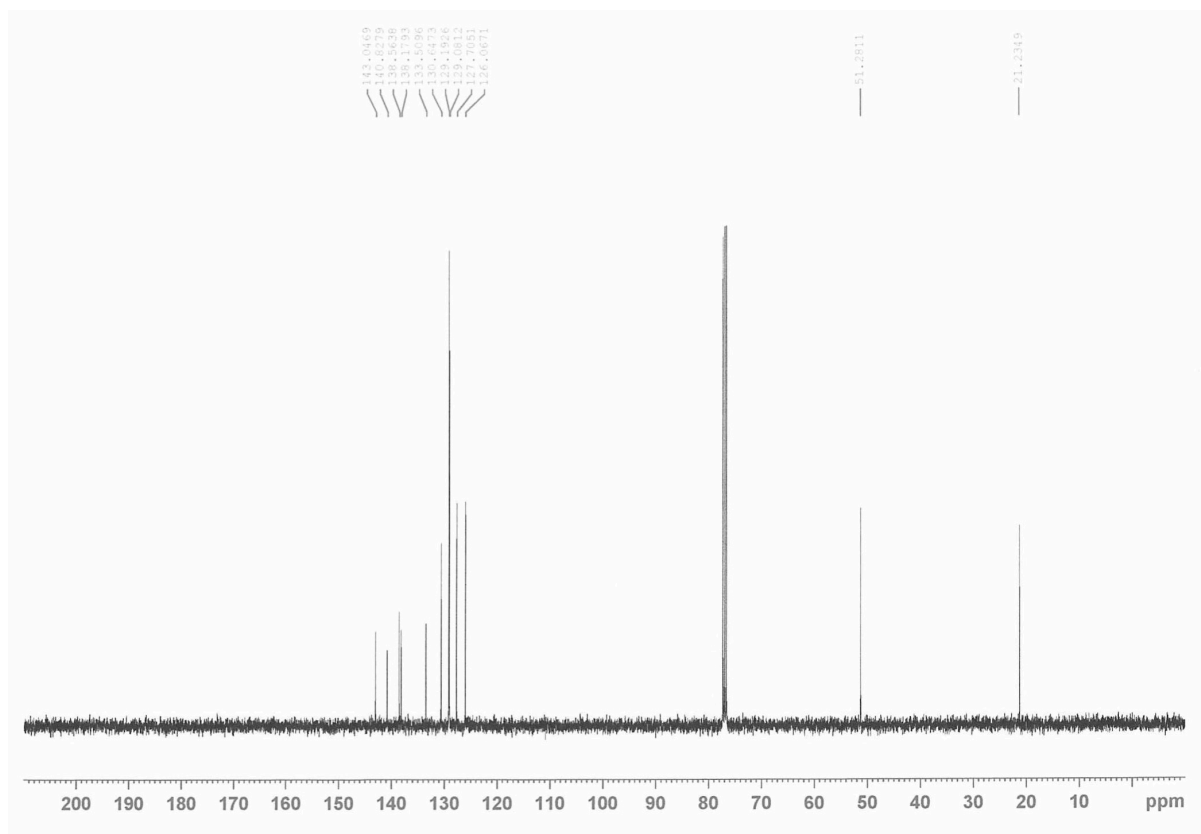

$^1\text{H}$  NMR (400 MHz) and  $^{13}\text{C}$  NMR (101 MHz) spectra of methyl 4'-methyl-5-(trifluoromethyl)-1,1'-biphenyl-2-sulfinate (**3p**) ( $\text{CDCl}_3$ )

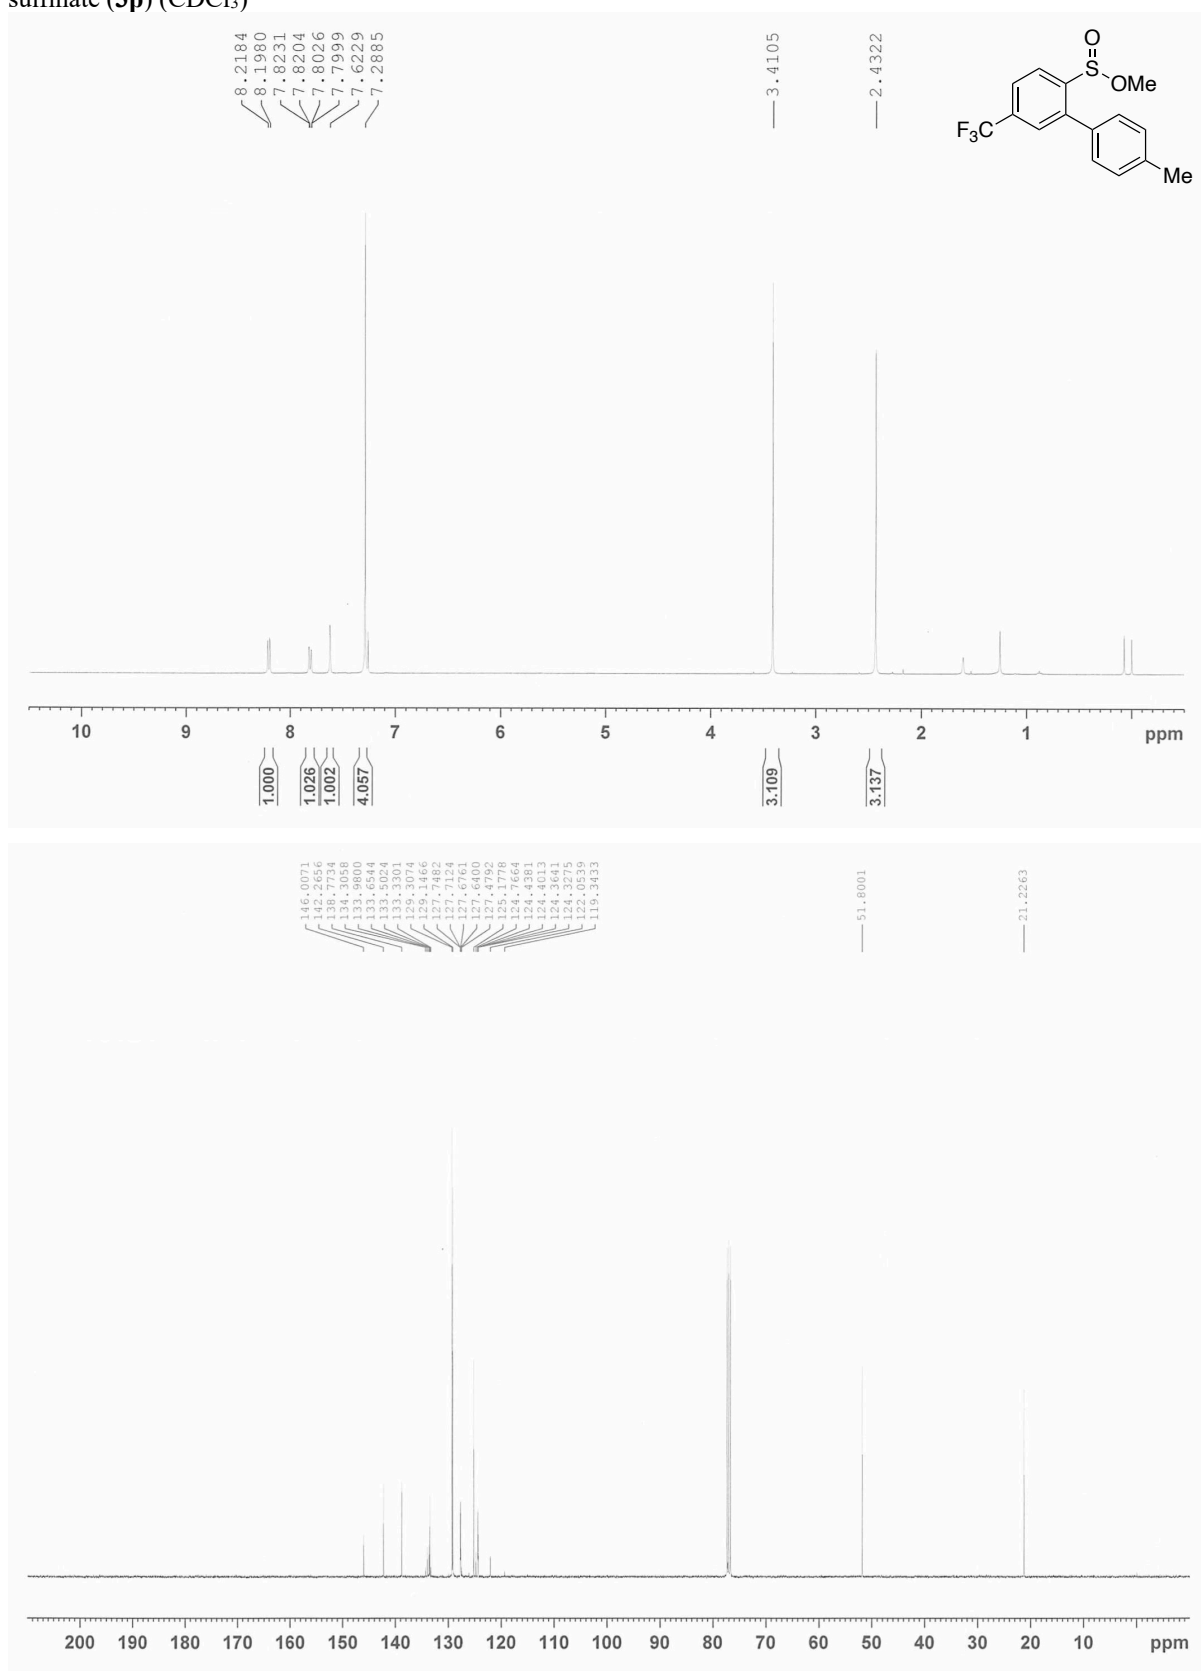

$^1\text{H}$  NMR (400 MHz) and  $^{13}\text{C}$  NMR (101 MHz) spectra of ethyl 6-(methoxysulfinyl)-4'-methyl-[1,1'-biphenyl]-3-carboxylate (**3q**) ( $\text{CDCl}_3$ )

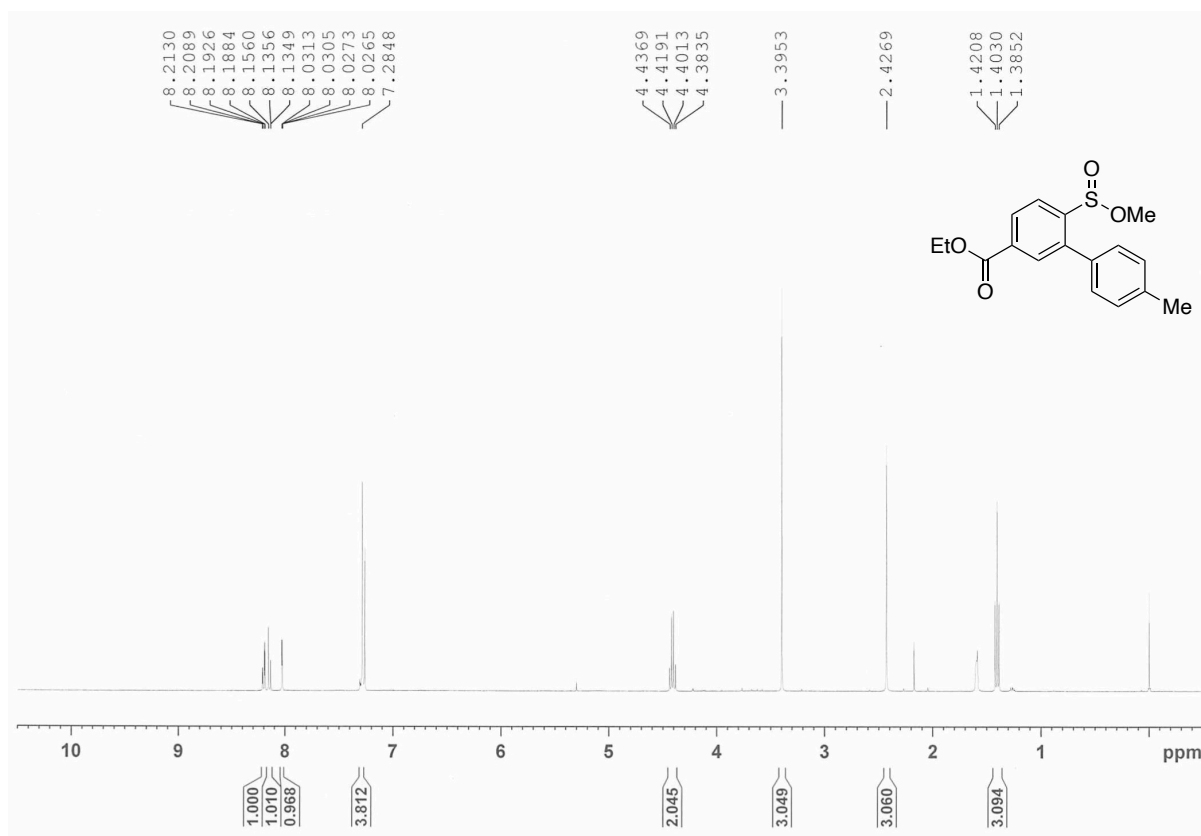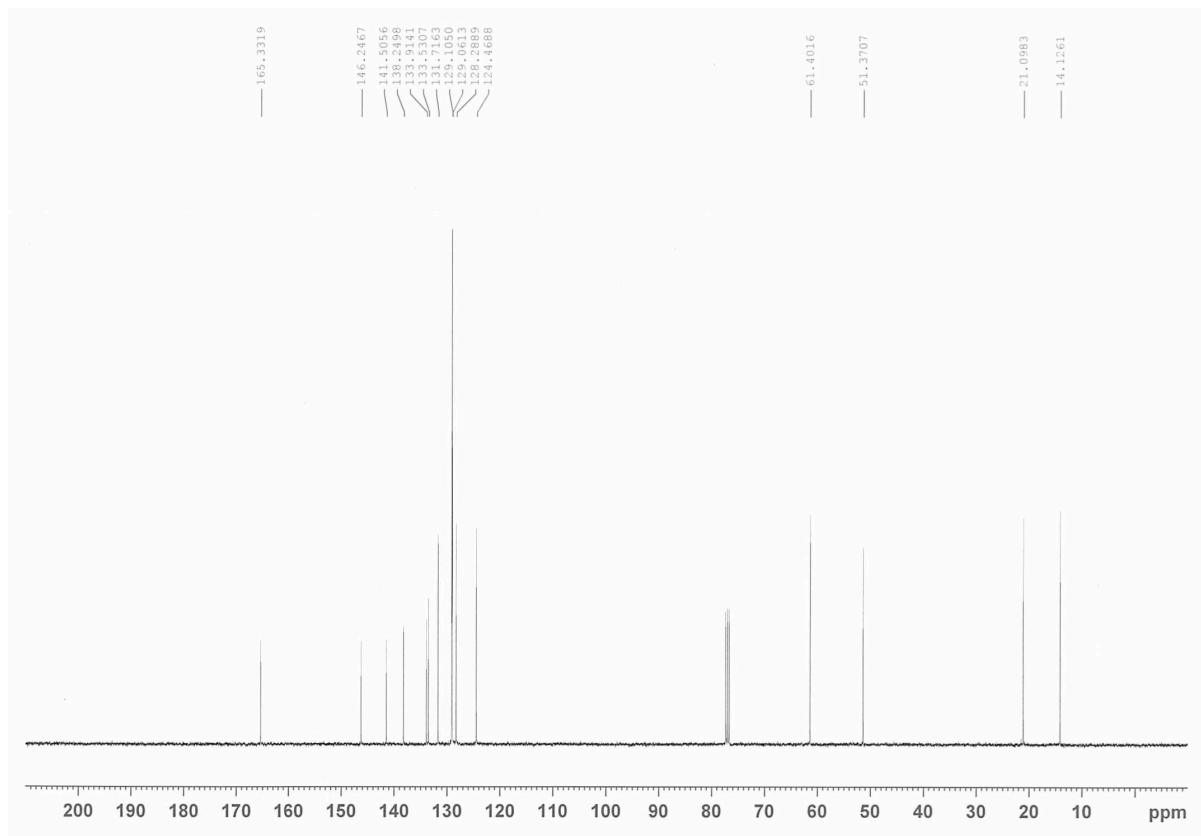

$^1\text{H}$  NMR (400 MHz) and  $^{13}\text{C}$  NMR (101 MHz) spectra of methyl (*E*)-2-styrylbenzenesulfinate (**3r**) ( $\text{CDCl}_3$ )

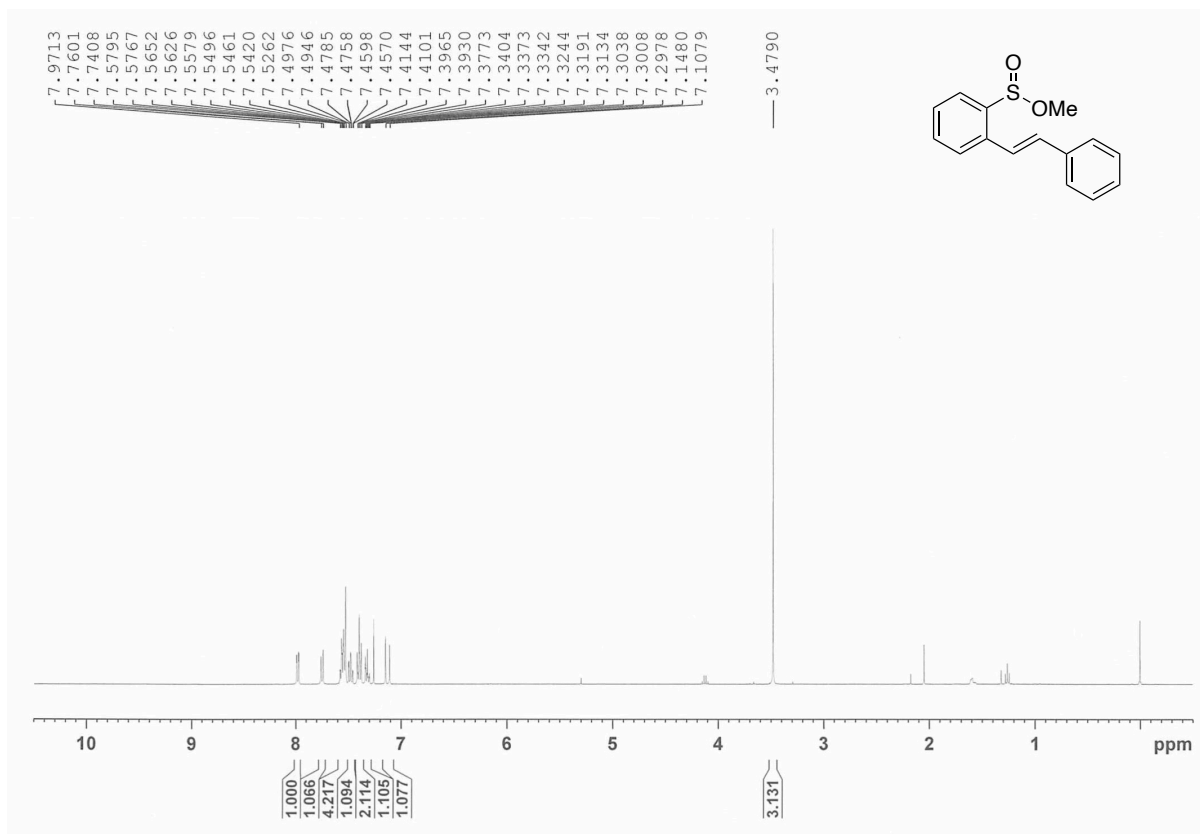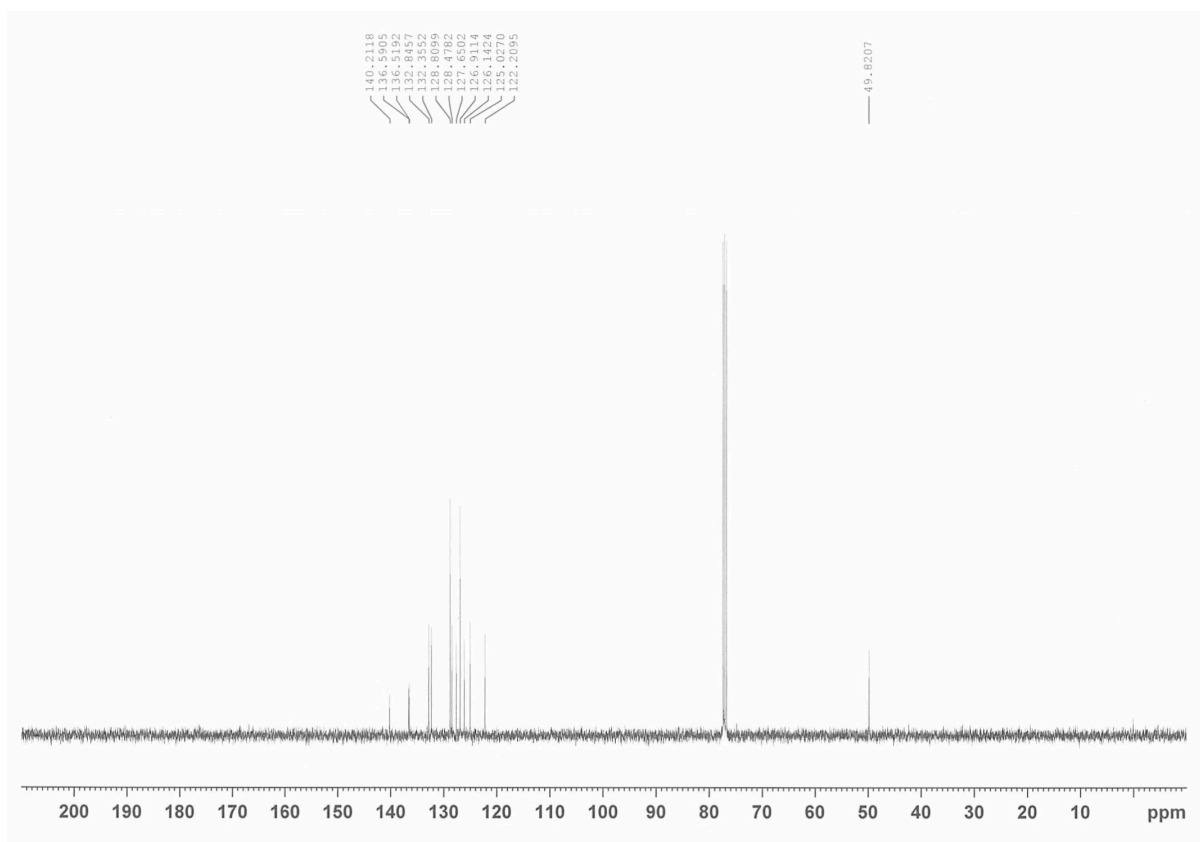





$^1\text{H}$  NMR (400 MHz) and  $^{13}\text{C}$  NMR (101 MHz) spectra of 3-methyldibenzo[*b,d*]thiophene 5-oxide (**4a**) ( $\text{CDCl}_3$ )

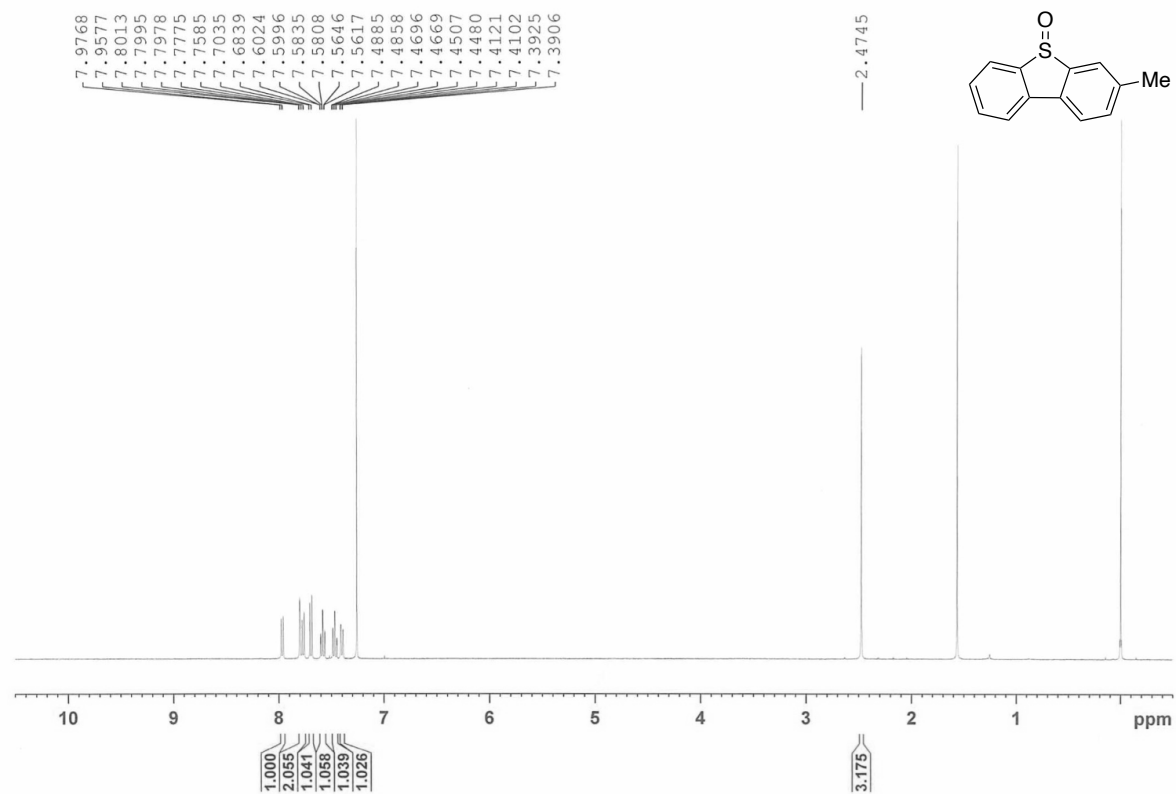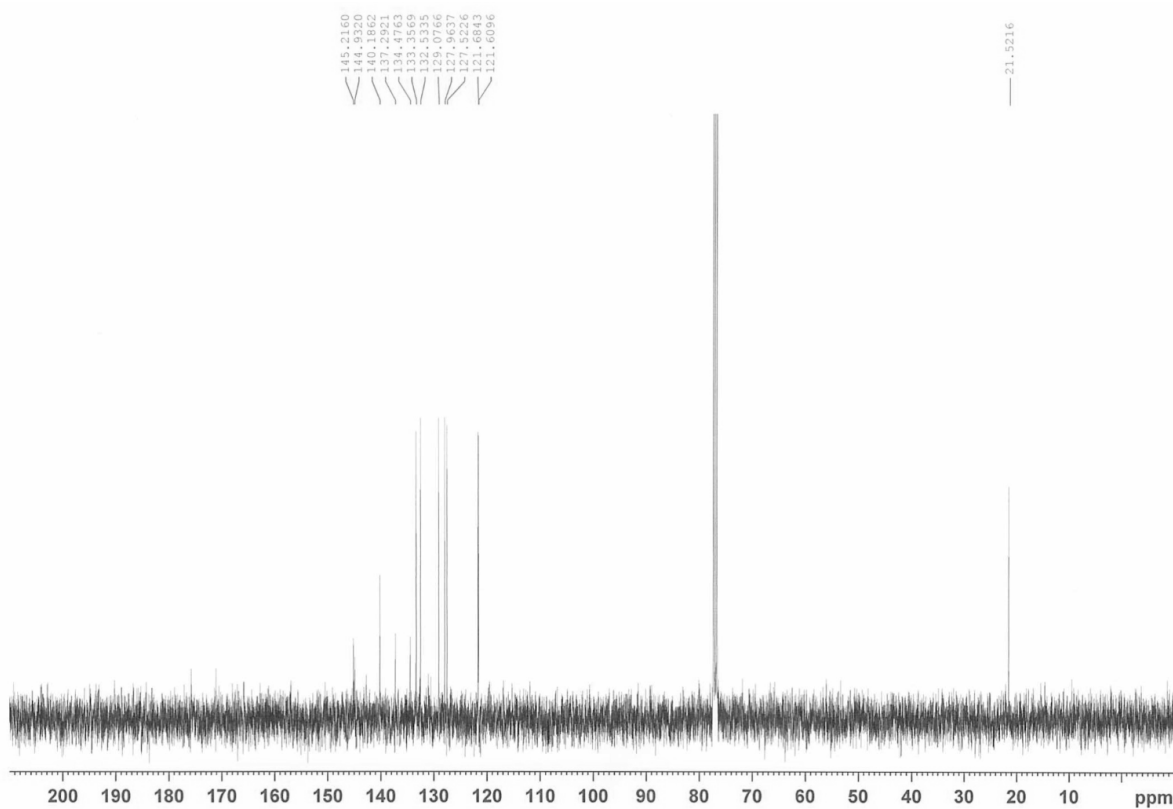

$^1\text{H}$  NMR (400 MHz) and  $^{13}\text{C}$  NMR (101 MHz) spectra of 3-fluorodibenzo[*b,d*]thiophene 5-oxide (**4b**) ( $\text{CDCl}_3$ )

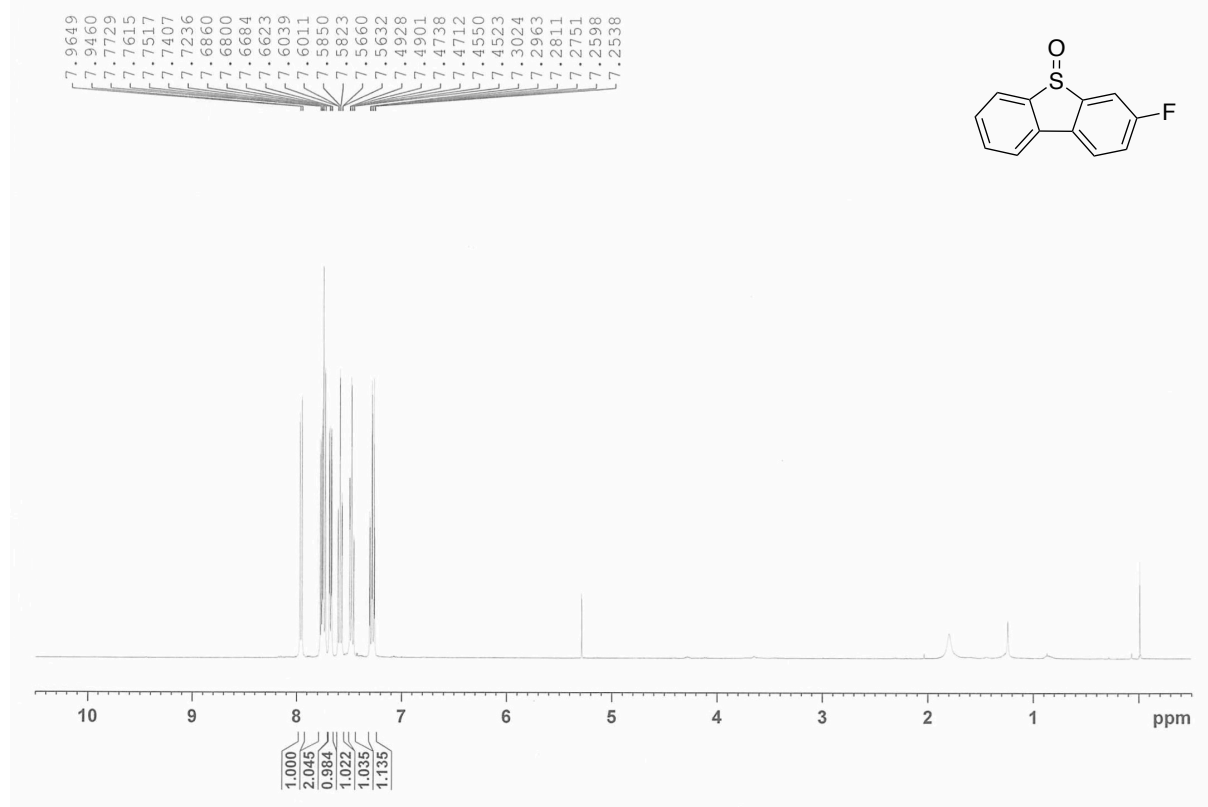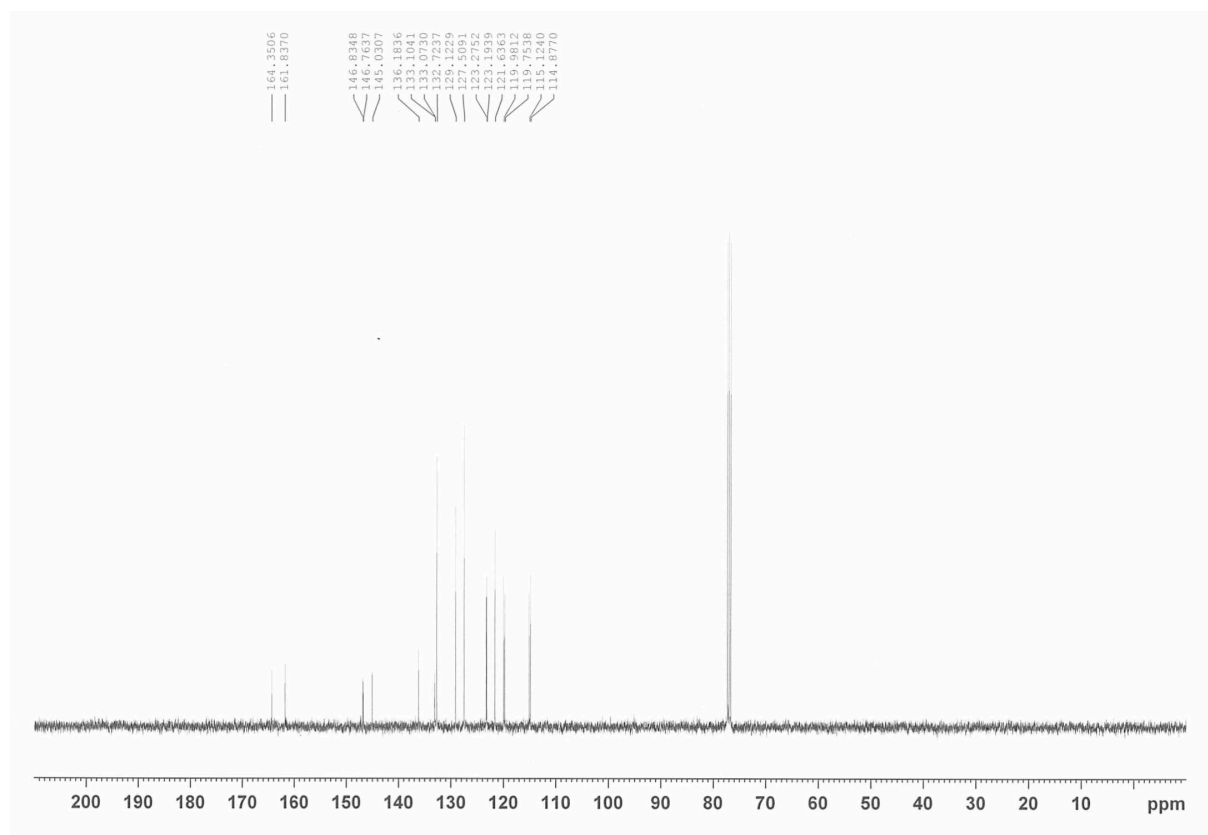

$^1\text{H}$  NMR (400 MHz) and  $^{13}\text{C}$  NMR (101 MHz) spectra of 3-chlorodibenzo[*b,d*]thiophene 5-oxide (**4c**) ( $\text{CDCl}_3$ )

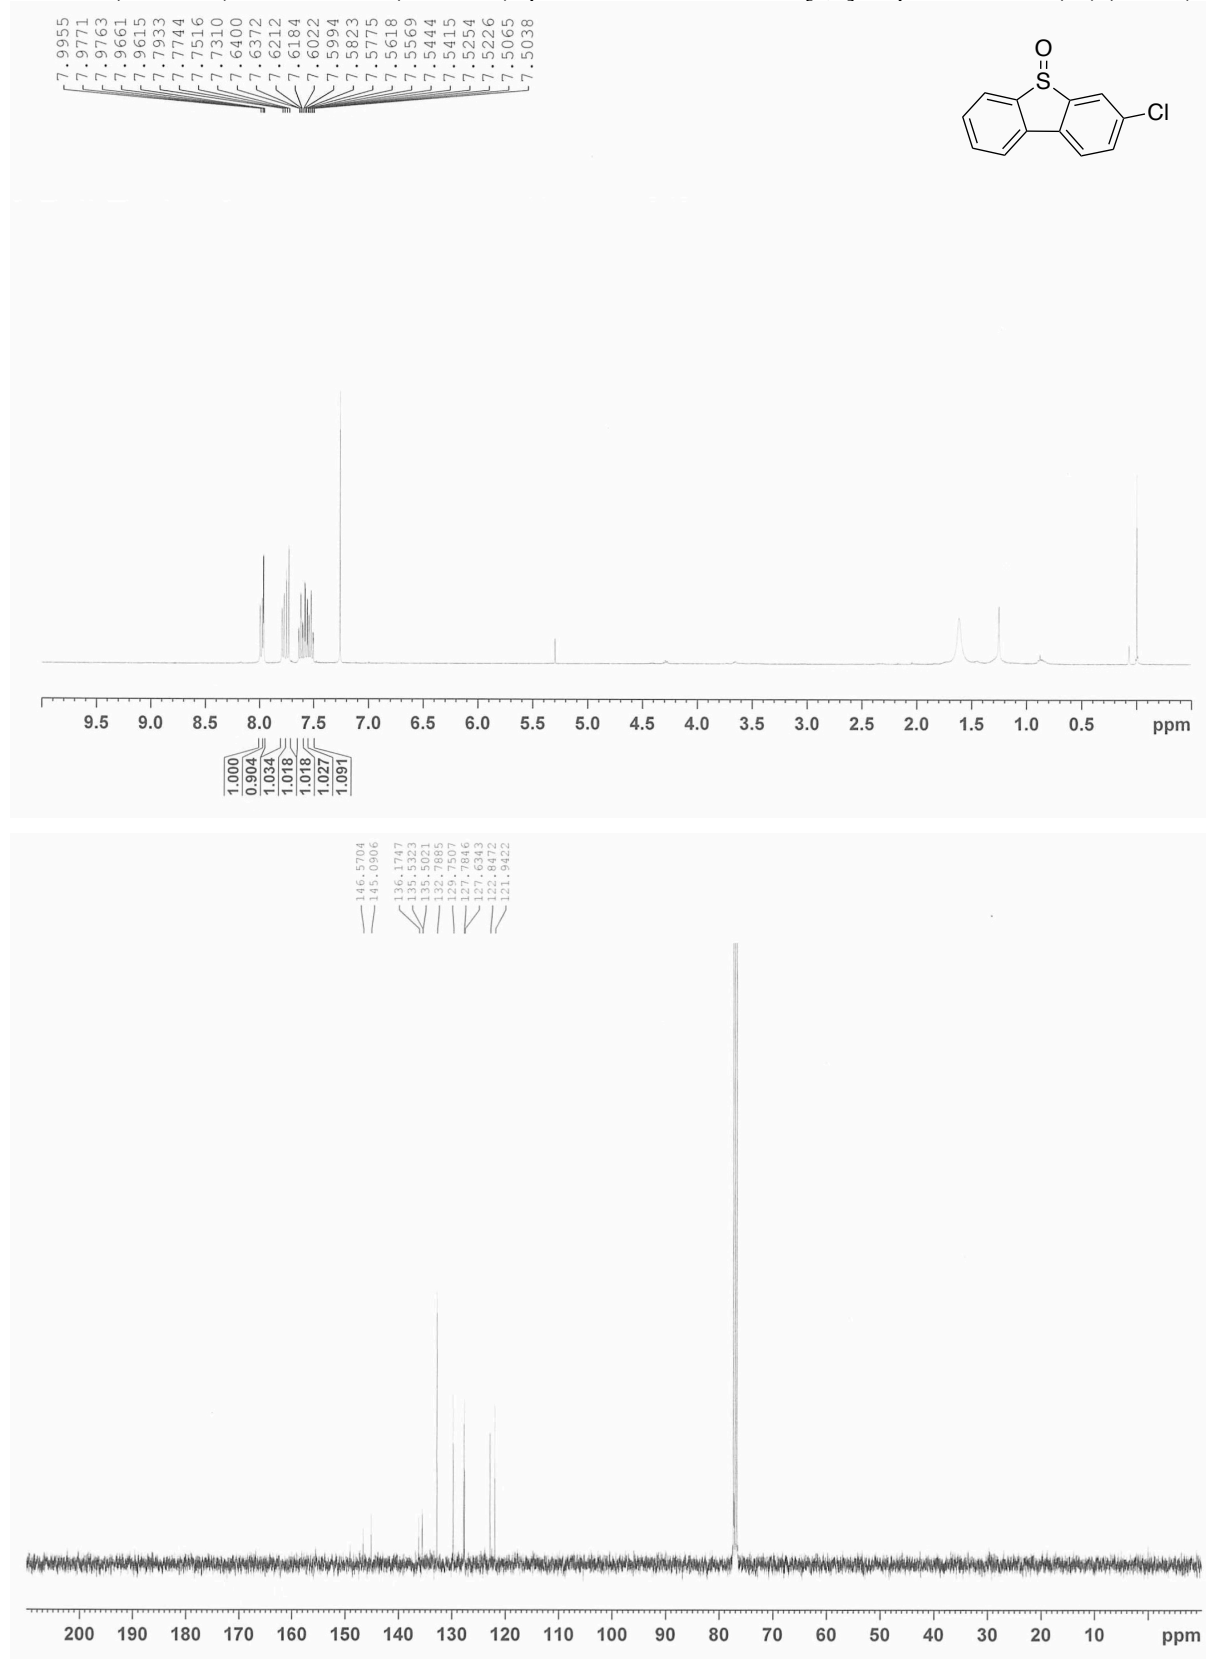

$^1\text{H}$  NMR (400 MHz) and  $^{13}\text{C}$  NMR (101 MHz) spectra of 3-methoxydibenzo[*b,d*]thiophene 5-oxide (**4d**) ( $\text{CDCl}_3$ )

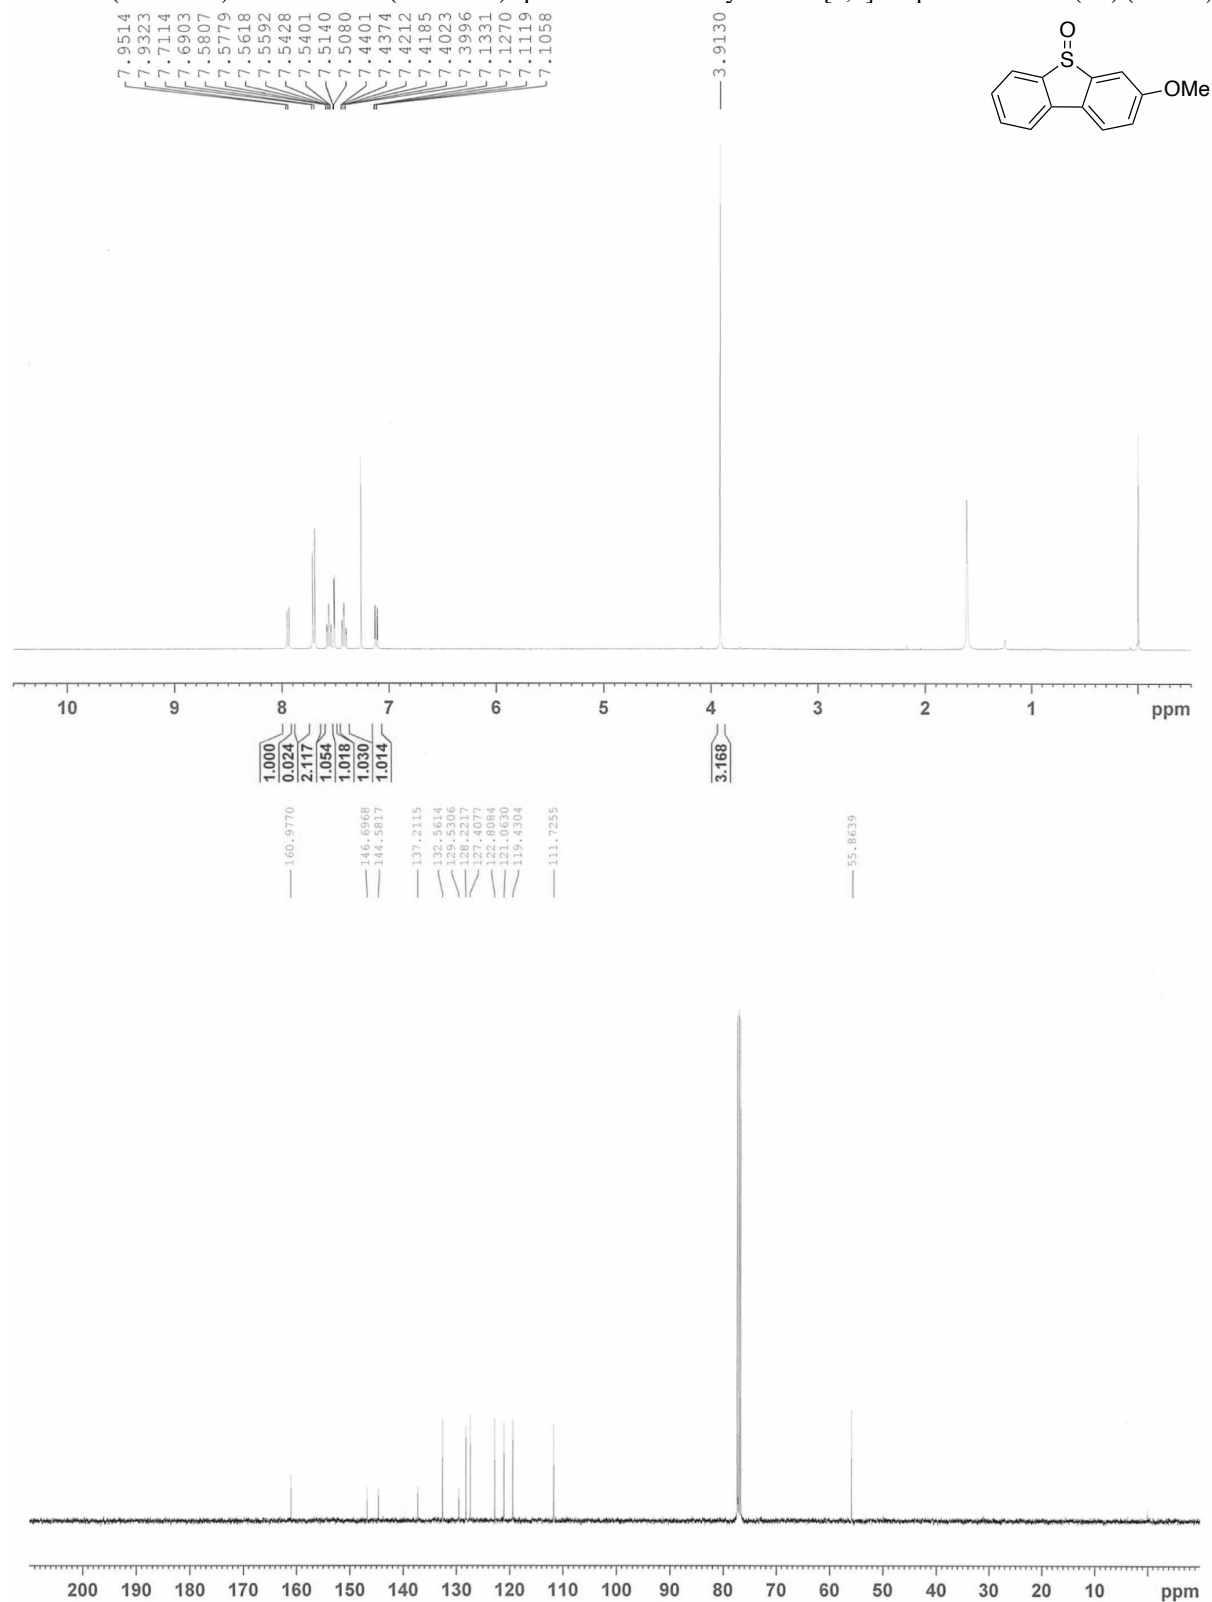

$^1\text{H}$  NMR (400 MHz) and  $^{13}\text{C}$  NMR (101 MHz) spectra of 2-methyldibenzo[*b,d*]thiophene 5-oxide (**4e**) and 4-methyldibenzo[*b,d*]thiophene 5-oxide (**4e'**) ( $\text{CDCl}_3$ )

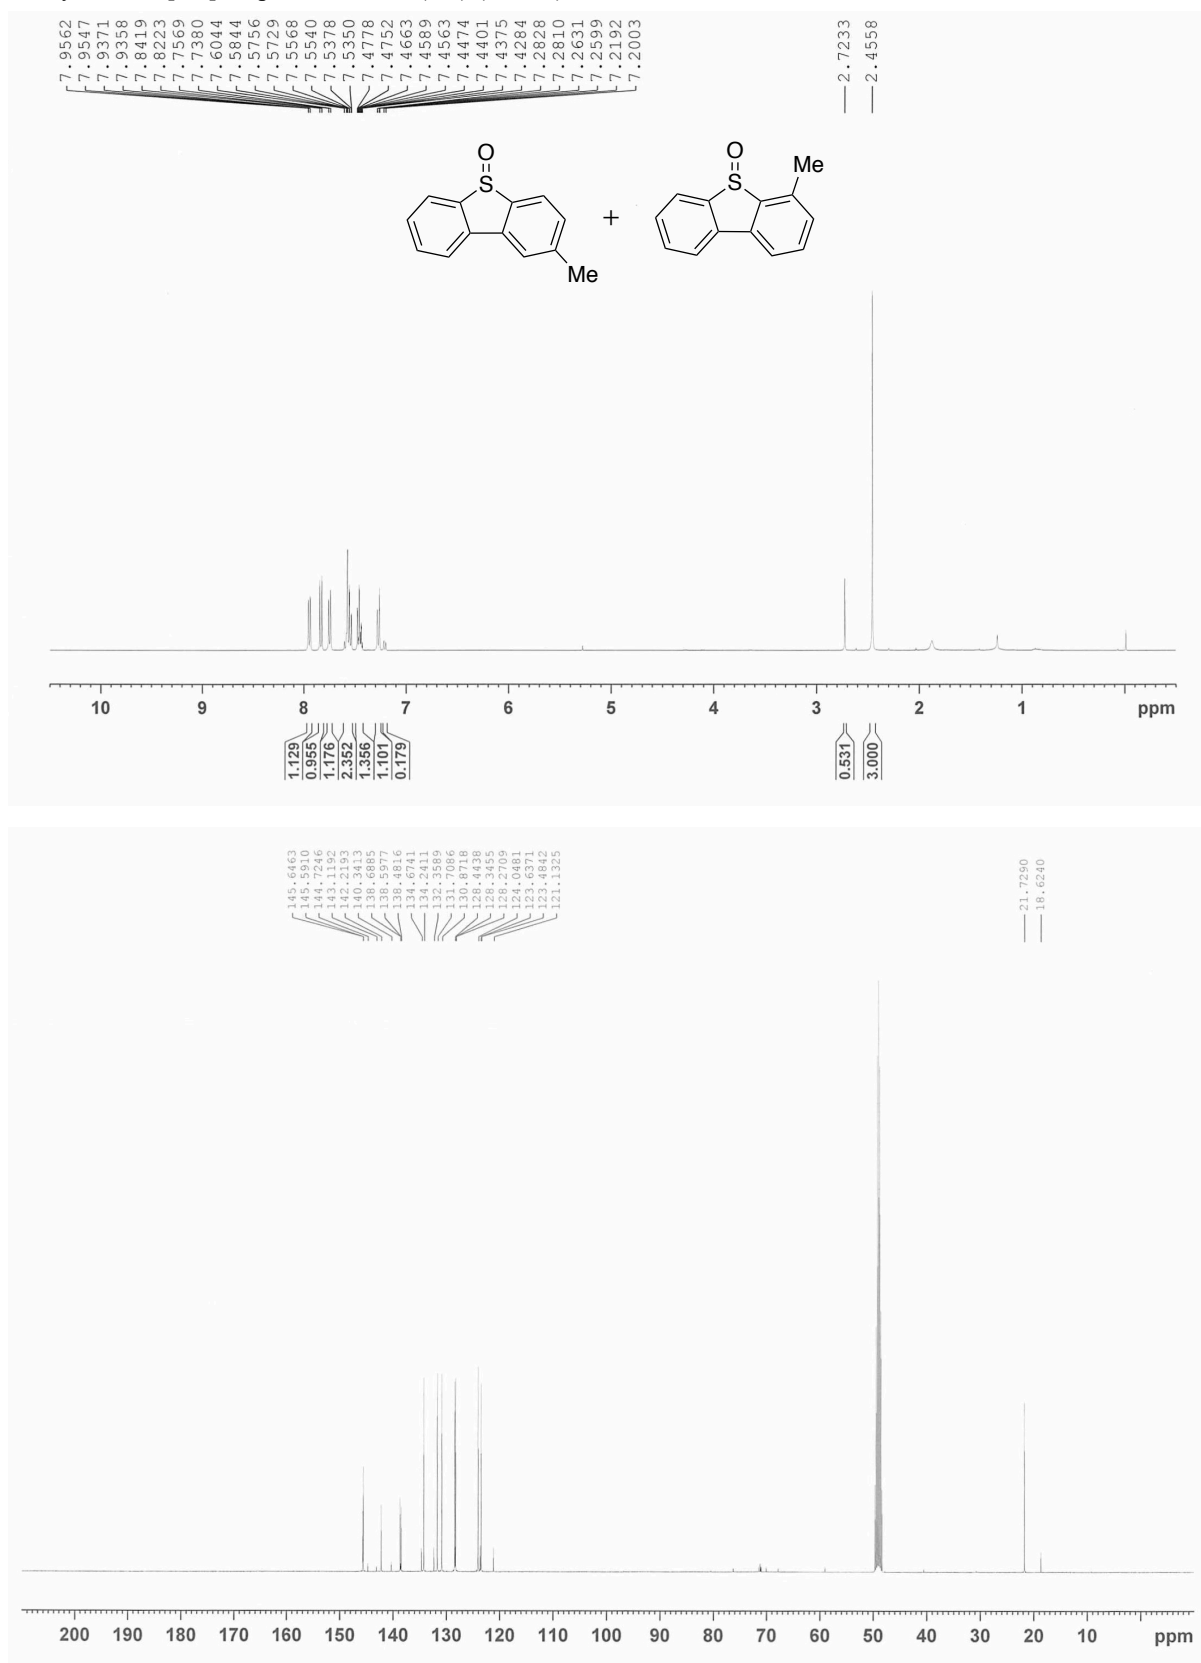

$^1\text{H}$  NMR (400 MHz) and  $^{13}\text{C}$  NMR (101 MHz) spectra of 1-methyldibenzo[*b,d*]thiophene 5-oxide (**4f**) ( $\text{CDCl}_3$ )

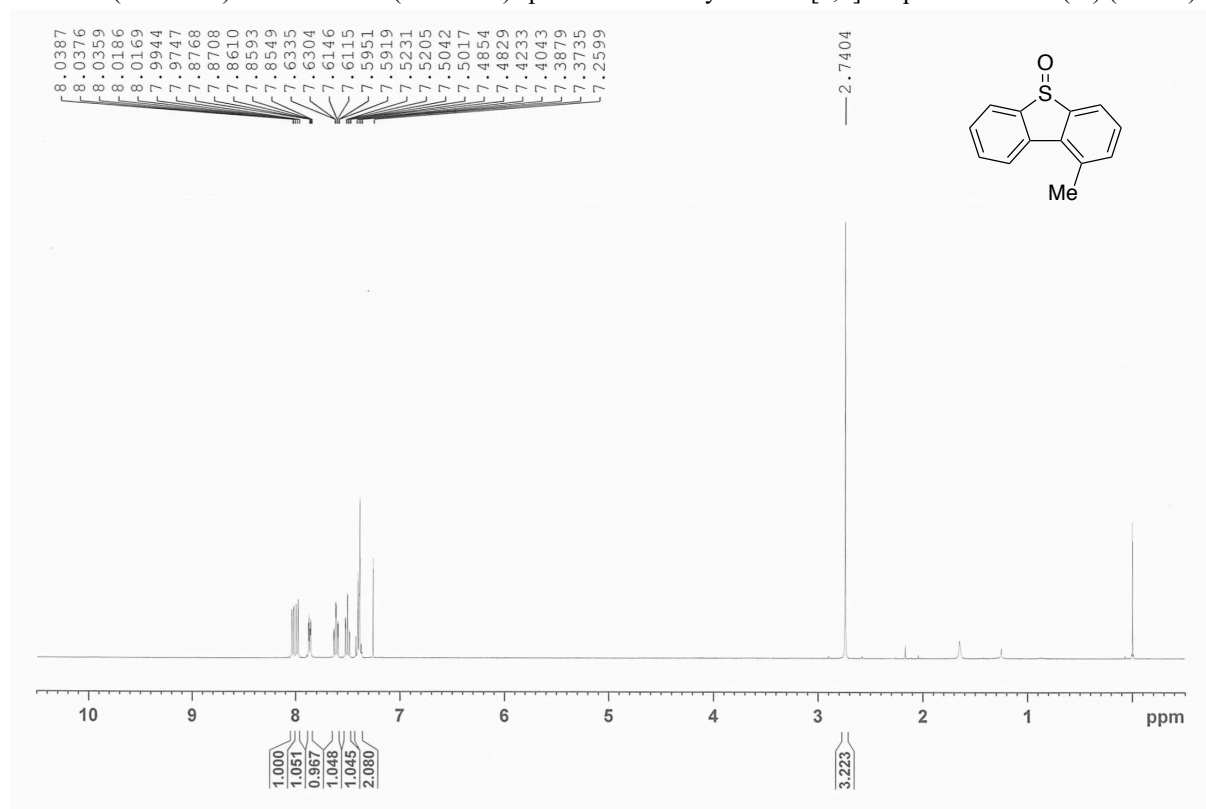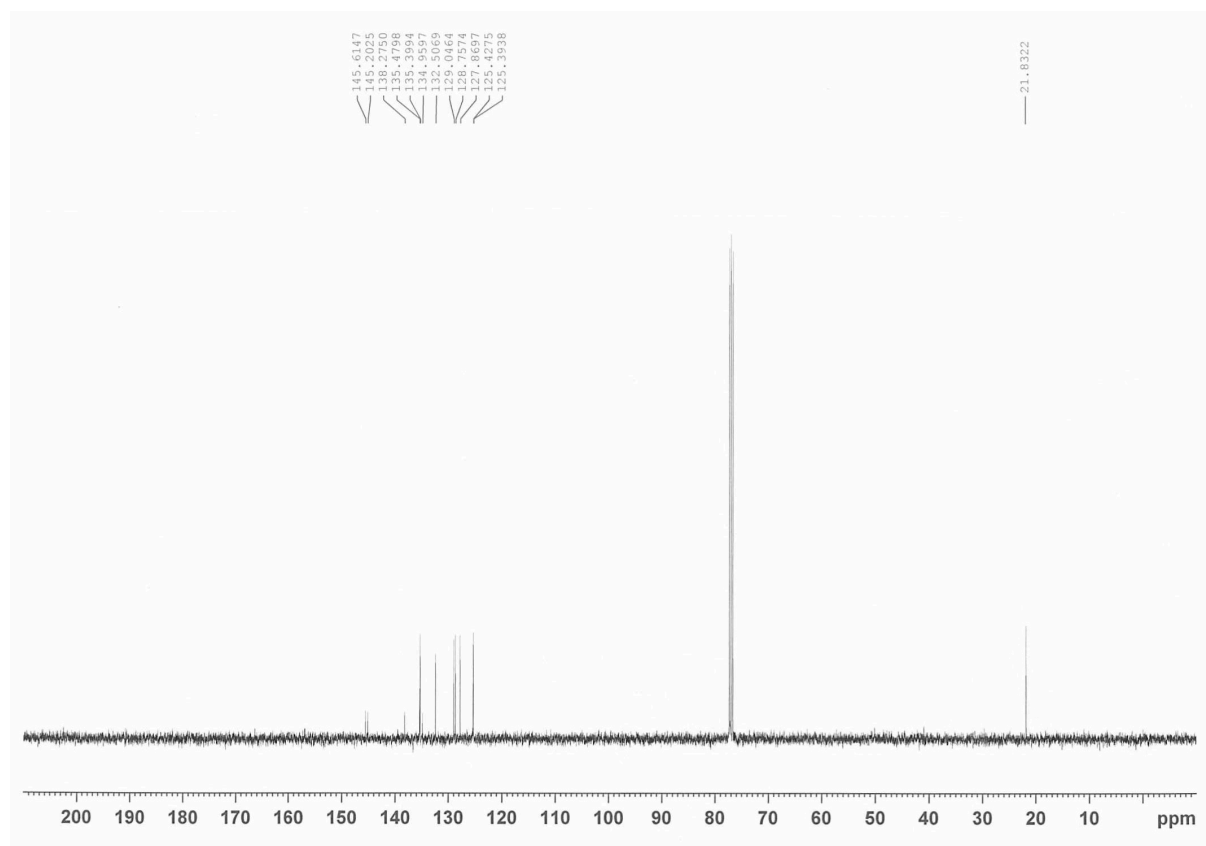

$^1\text{H}$  NMR (400 MHz) and  $^{13}\text{C}$  NMR (101 MHz) spectra of benzo[*b*]naphtho[2,1-*d*]thiophene 11-oxide (**4g**) ( $\text{CDCl}_3$ )

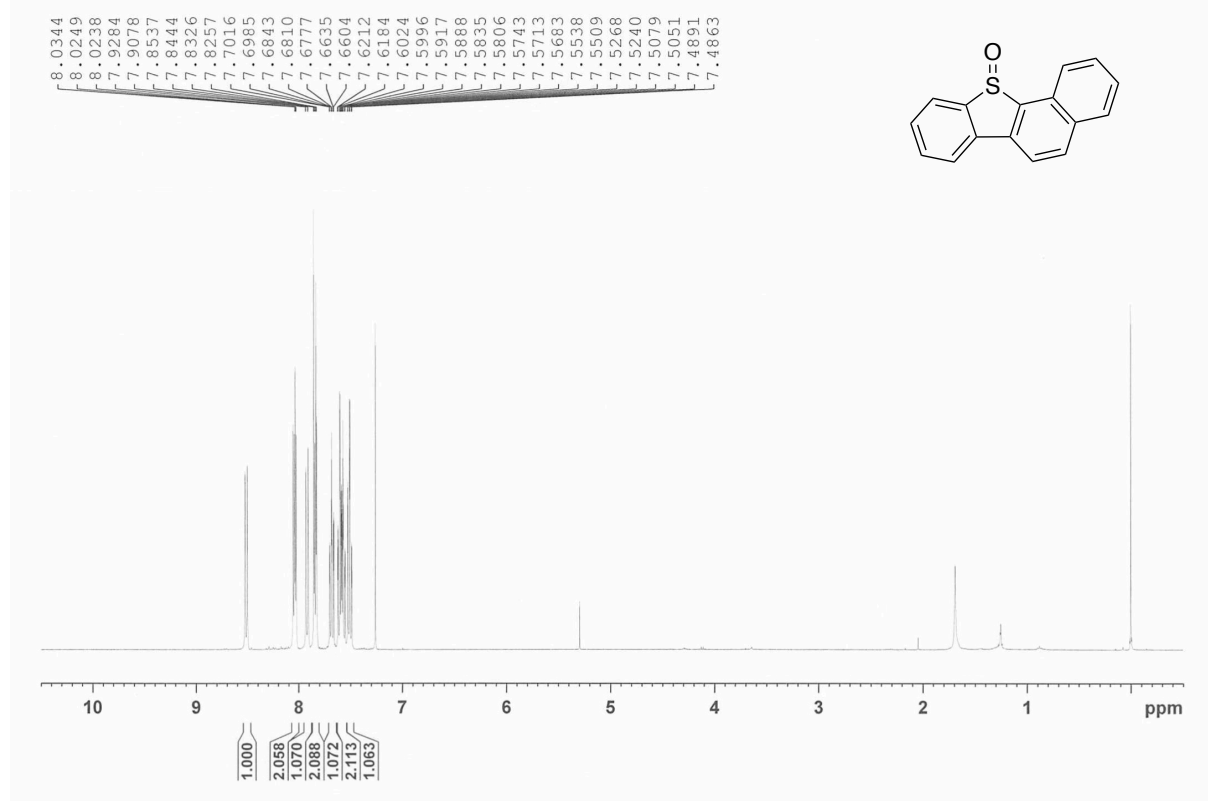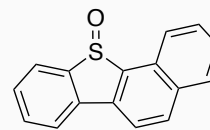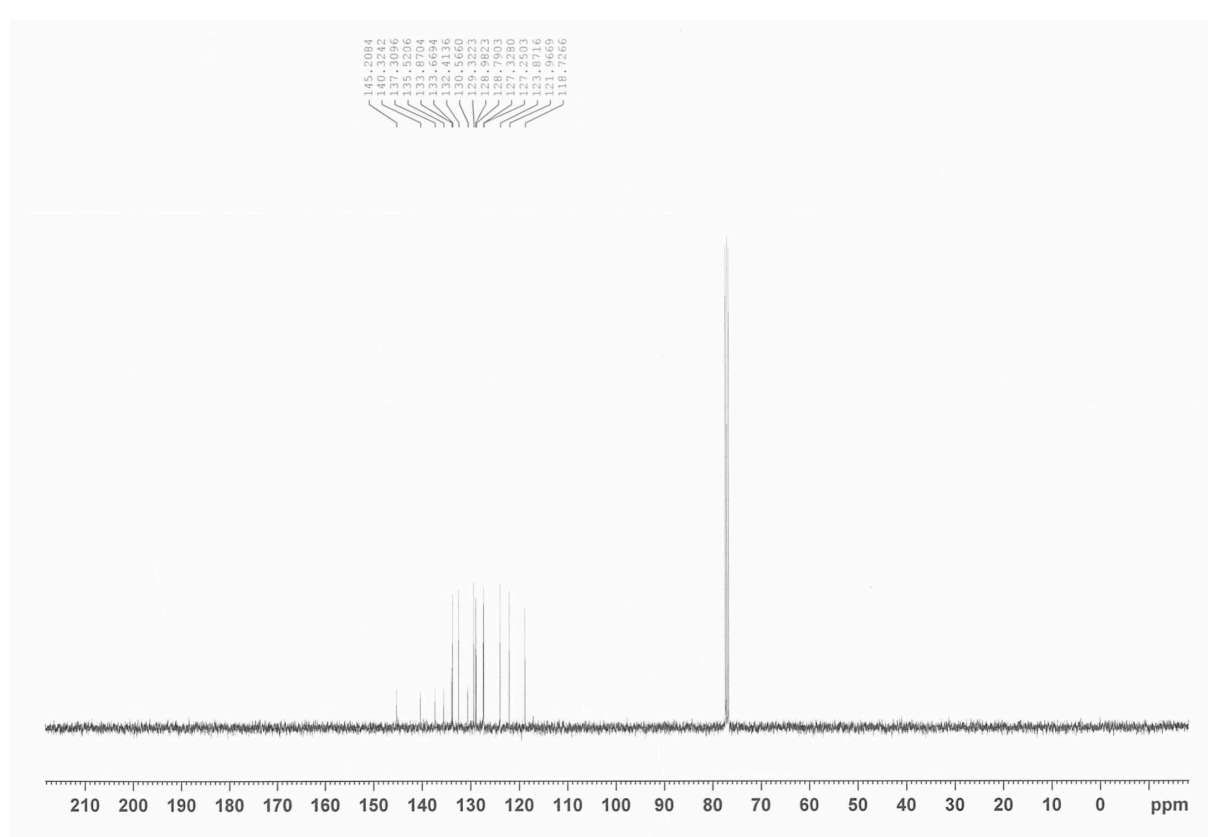



$^1\text{H}$  NMR (400 MHz) and  $^{13}\text{C}$  NMR (101 MHz) spectra of benzo[*b*]thieno[3,2-*d*]thiophene 8-oxide (**4h**) ( $\text{CDCl}_3$ )

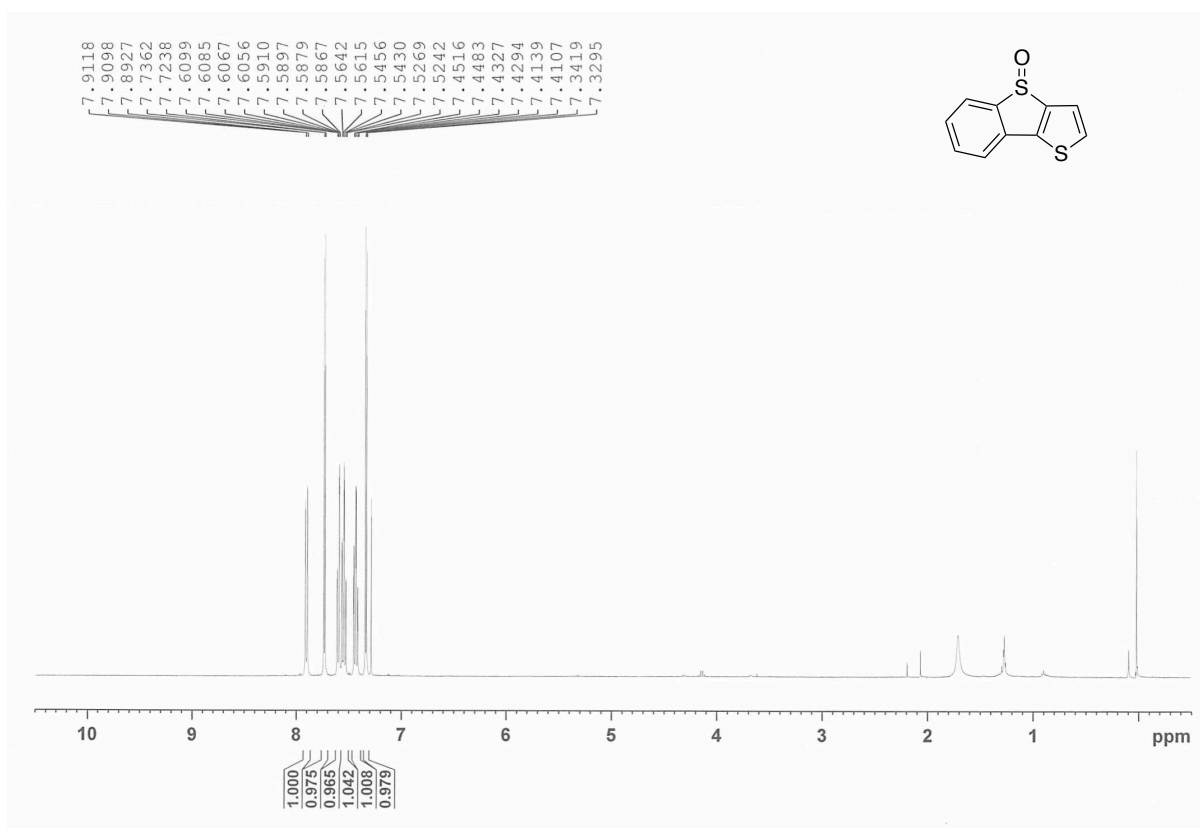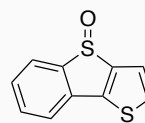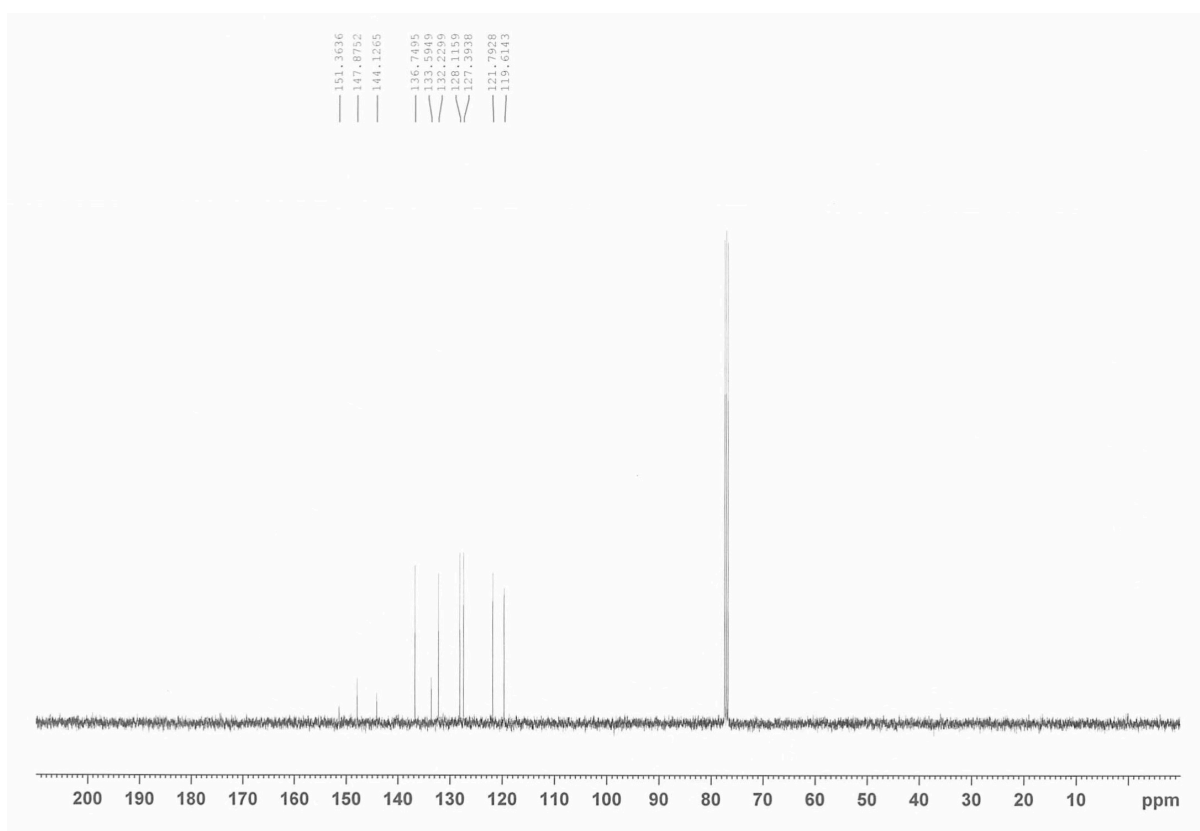

$^1\text{H}$  NMR (400 MHz) and  $^{13}\text{C}$  NMR (101 MHz) spectra of benzo[*b*]thieno[2,3-*d*]thiophene 4-oxide (**4i**) ( $\text{CDCl}_3$ )

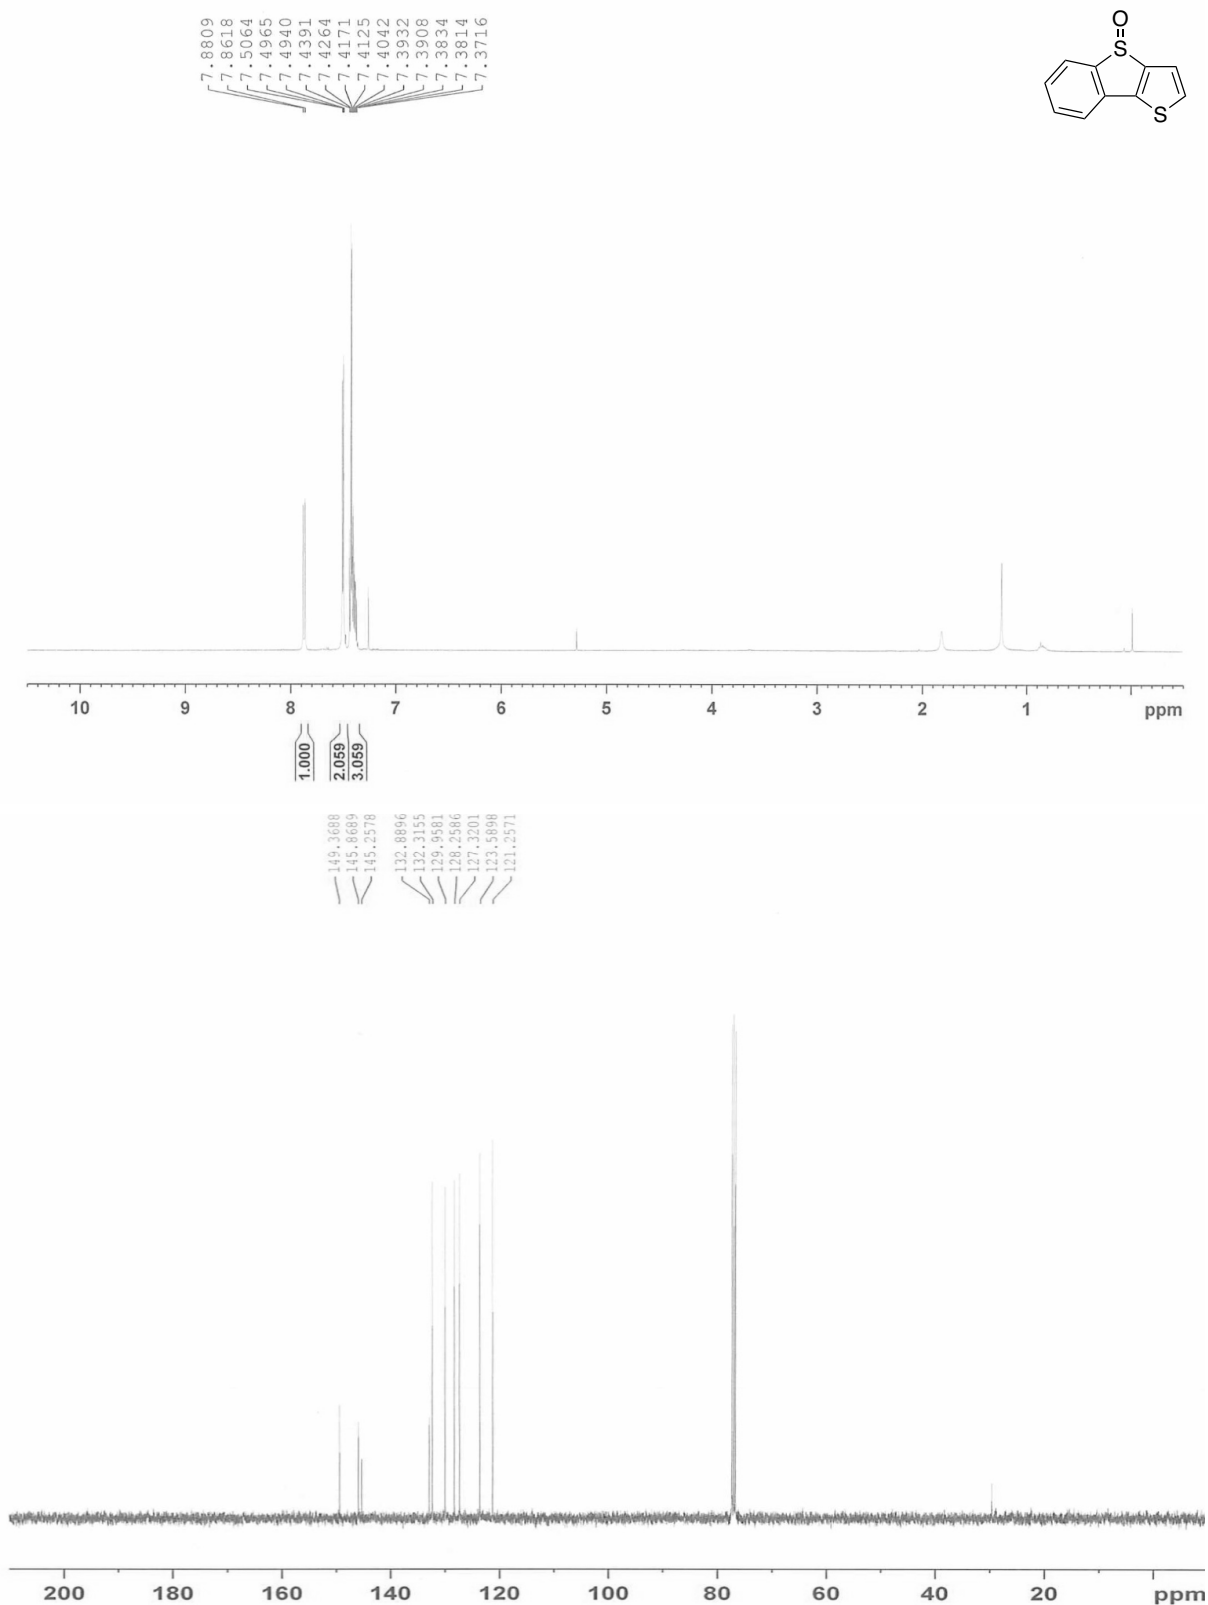

$^1\text{H}$  NMR (400 MHz) and  $^{13}\text{C}$  NMR (101 MHz) spectra of benzo[4,5]thieno[2,3-*b*]furan 8-oxide (**4j**) ( $\text{CDCl}_3$ )

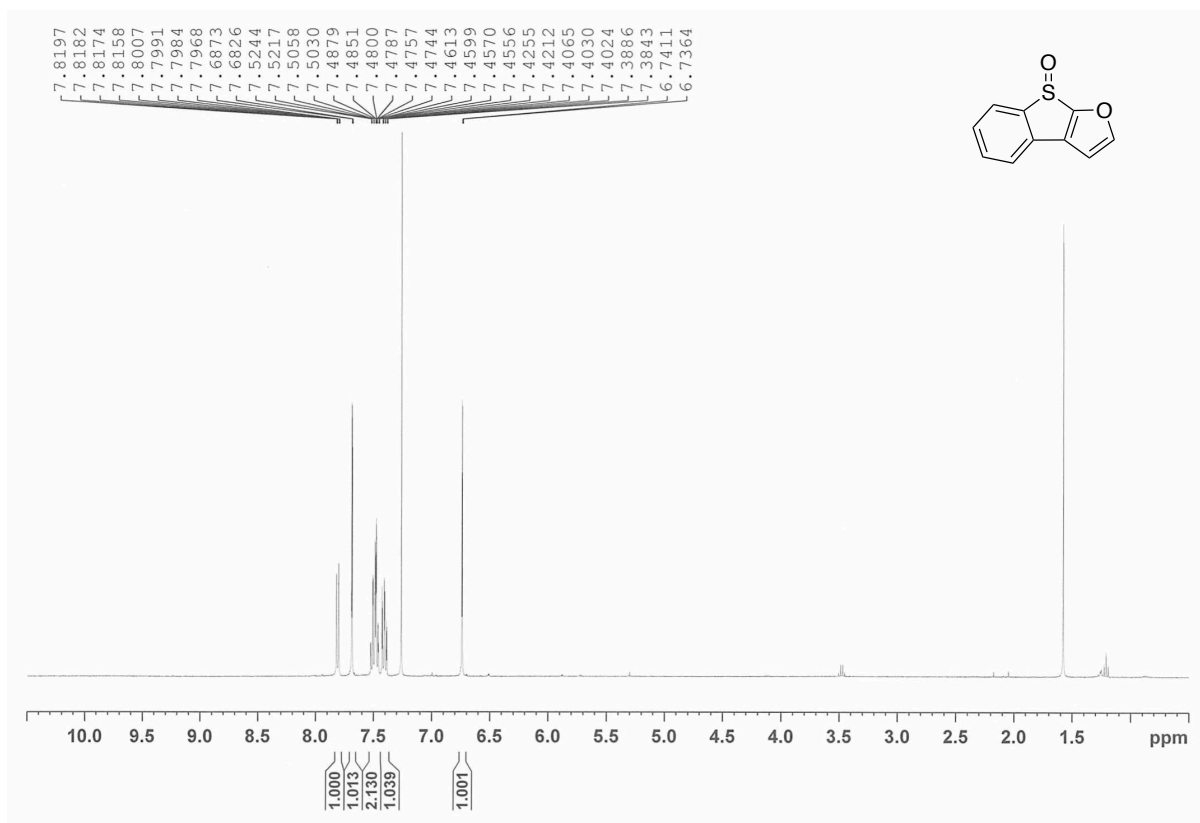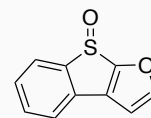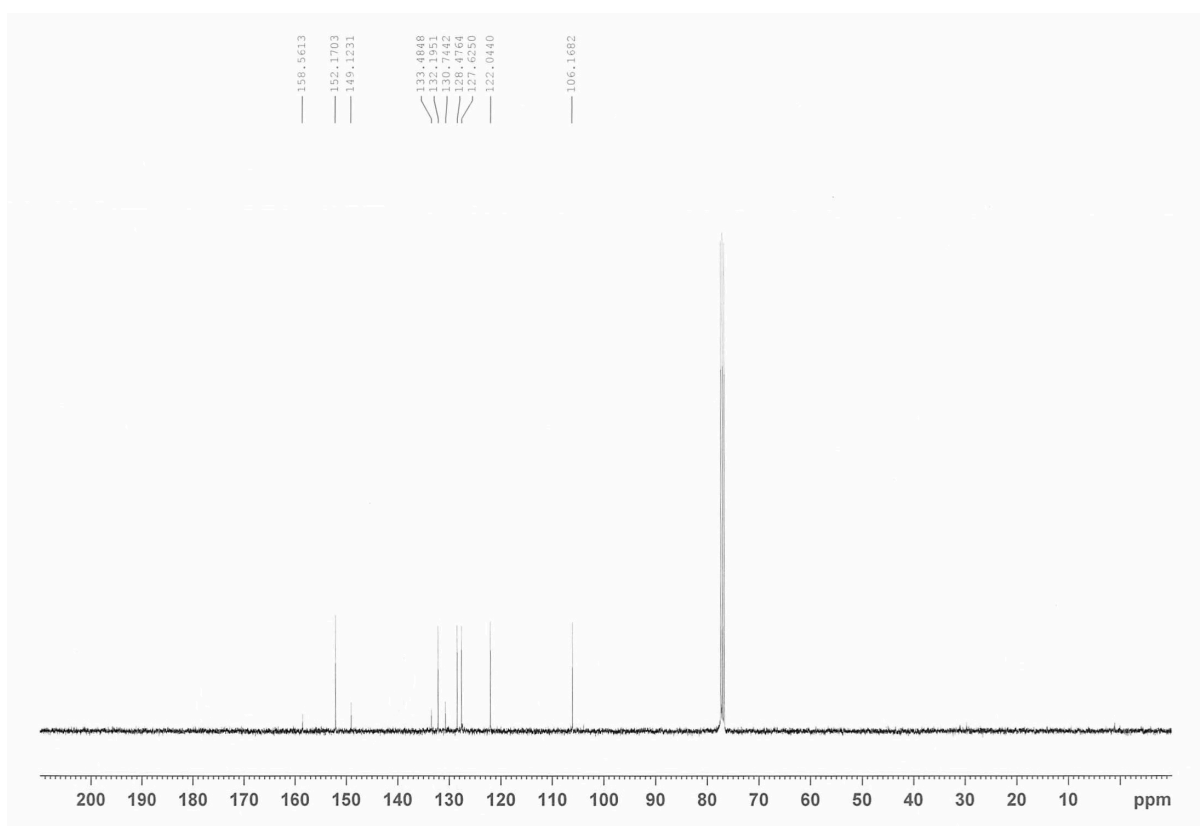

$^1\text{H}$  NMR (400 MHz) and  $^{13}\text{C}$  NMR (101 MHz) spectra of benzo[4,5]thieno[3,2-*b*]benzofuran 10-oxide (**4k**) ( $\text{CDCl}_3$ )

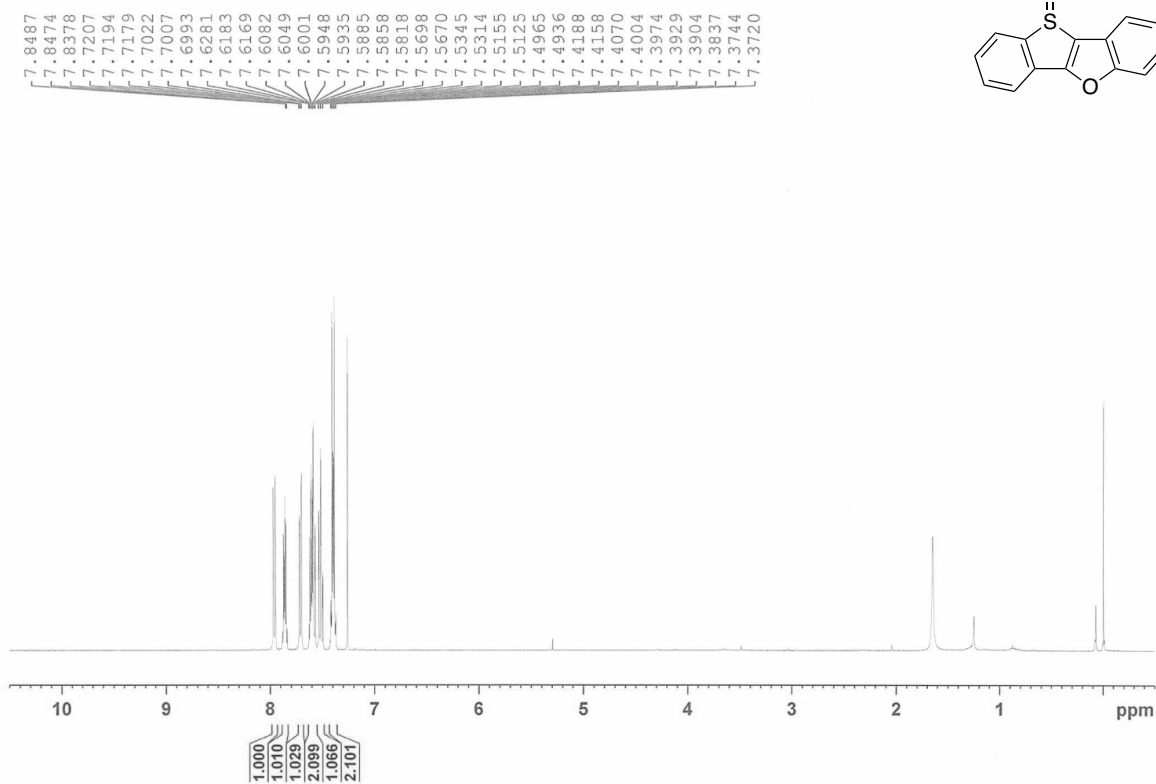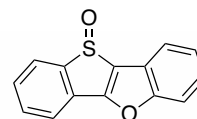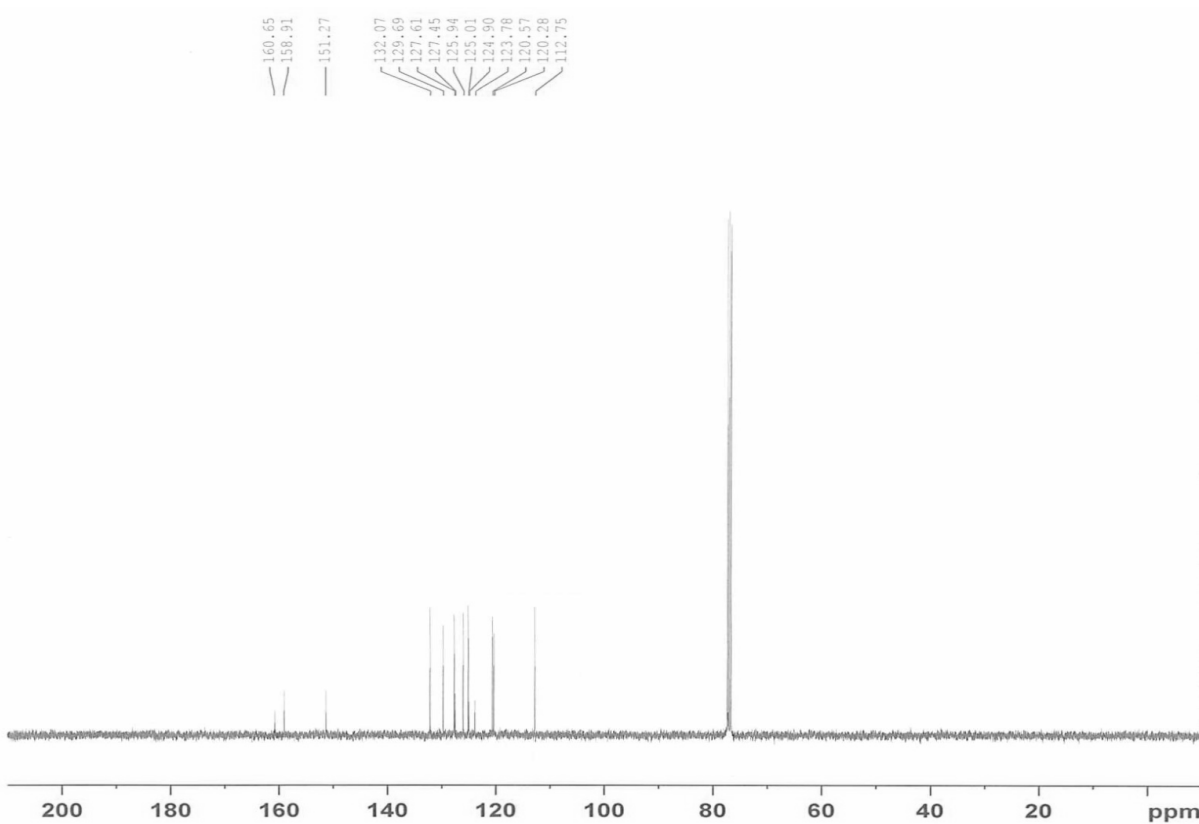

$^1\text{H}$  NMR (400 MHz) and  $^{13}\text{C}$  NMR (101 MHz) spectra of 2,7-dimethyldibenzo[*b,d*]thiophene 5-oxide (**41**) ( $\text{CDCl}_3$ )

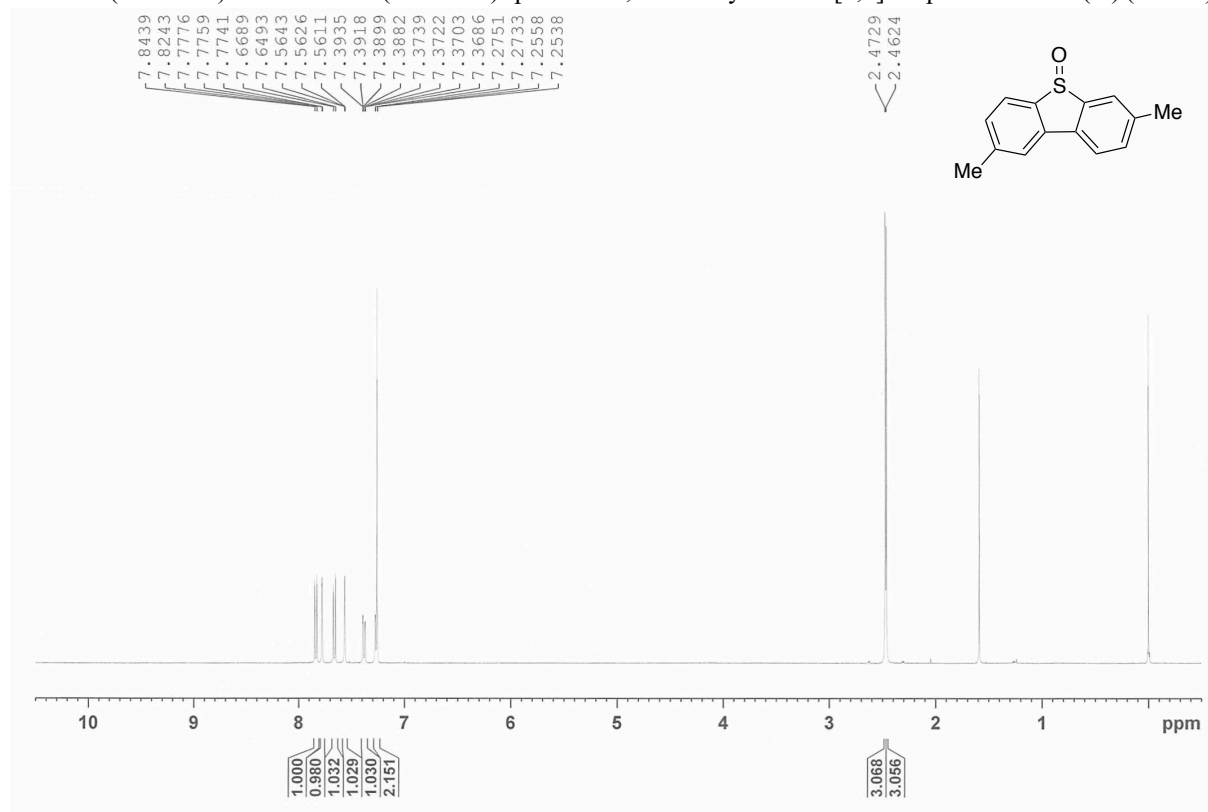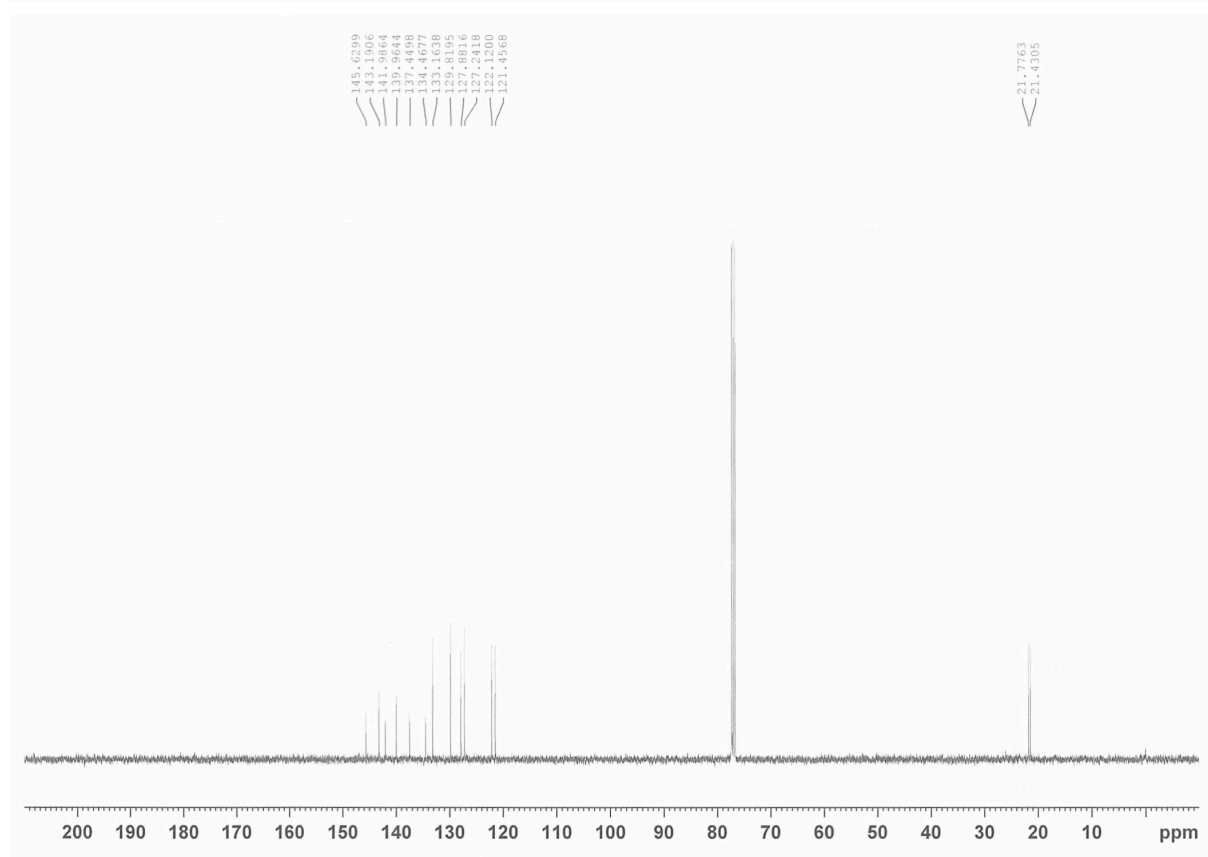

$^1\text{H}$  NMR (400 MHz) and  $^{13}\text{C}$  NMR (101 MHz) spectra of 2,4,7-trimethyldibenzo[*b,d*]thiophene 5-oxide (**4m**) ( $\text{CDCl}_3$ )

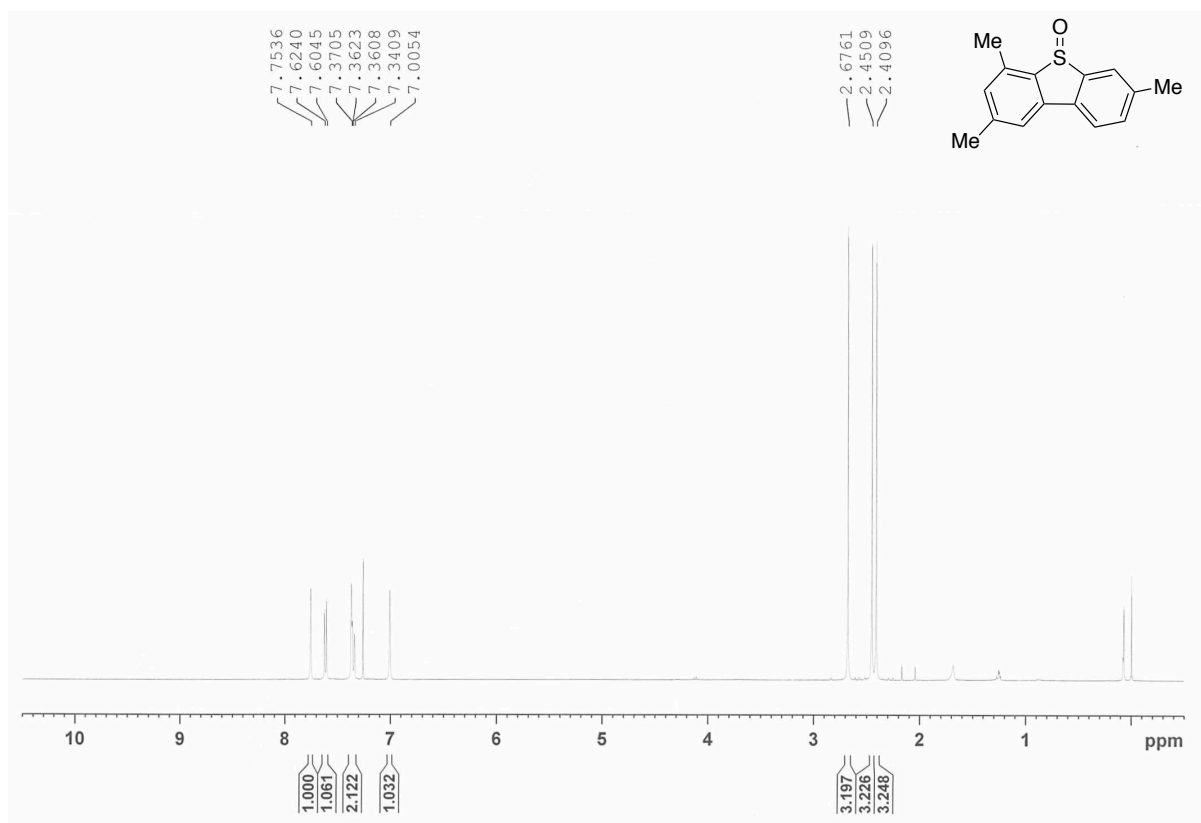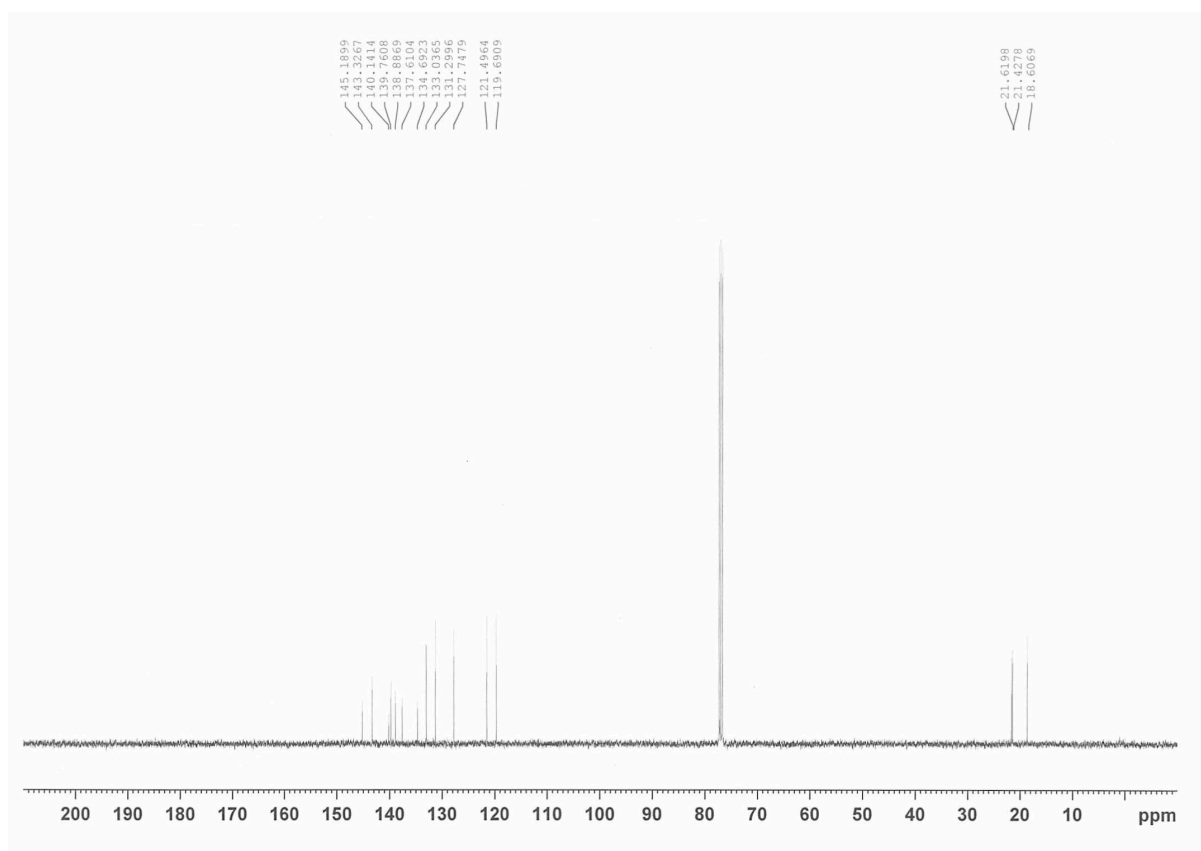

$^1\text{H}$  NMR (400 MHz) and  $^{13}\text{C}$  NMR (101 MHz) spectra of 7-methylbenzo[4',5']thieno[2',3':4,5]benzo[1,2-*d*][1,3]dioxole 5-oxide (**4n**) ( $\text{CDCl}_3$ )

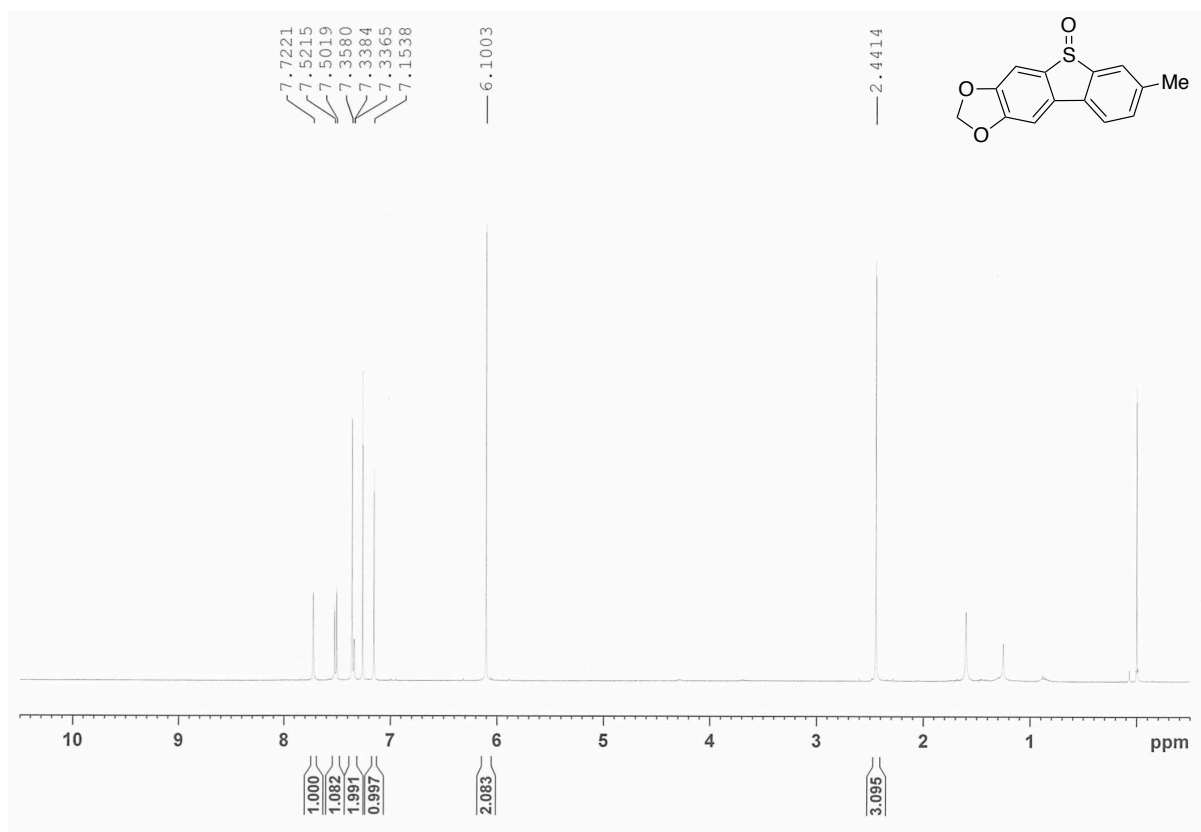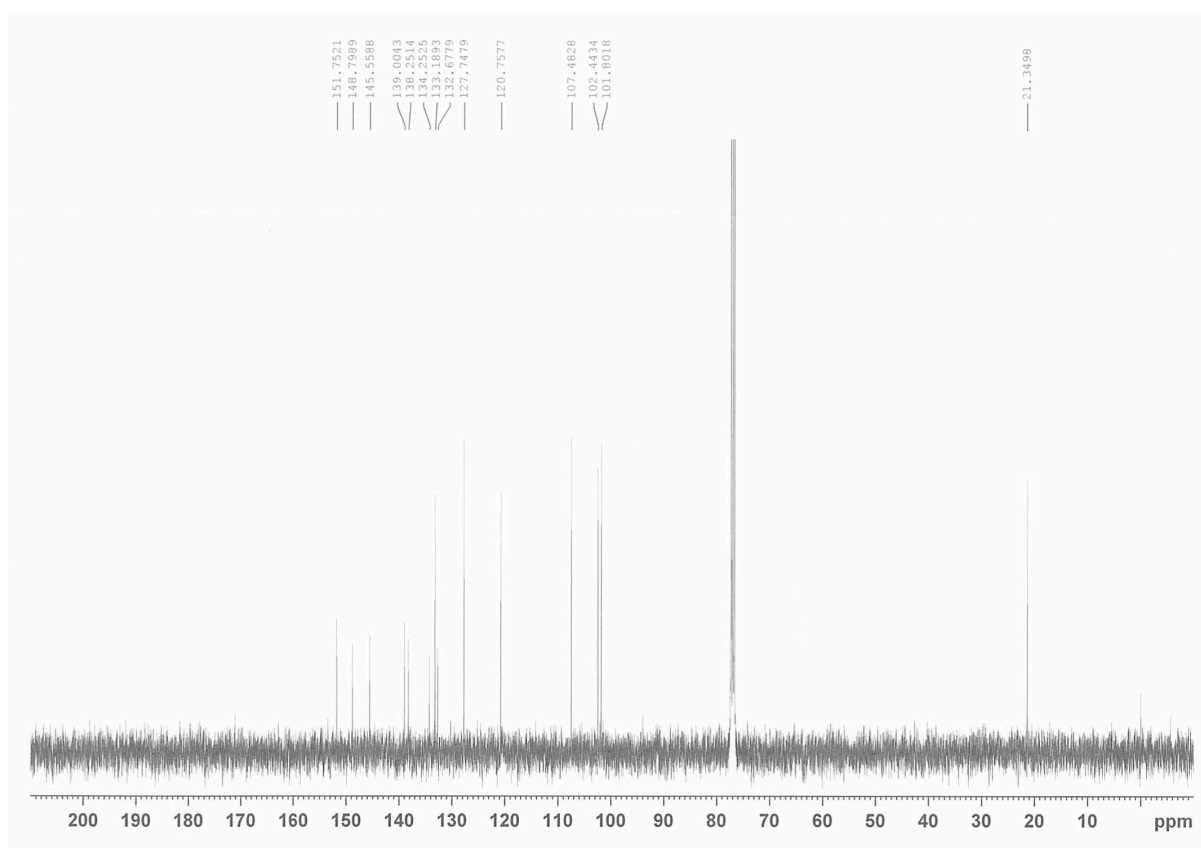

$^1\text{H}$  NMR (400 MHz) and  $^{13}\text{C}$  NMR (101 MHz) spectra of 2-chloro-7-methyldibenzo[*b,d*]thiophene 5-oxide (**4o**) ( $\text{CDCl}_3$ )

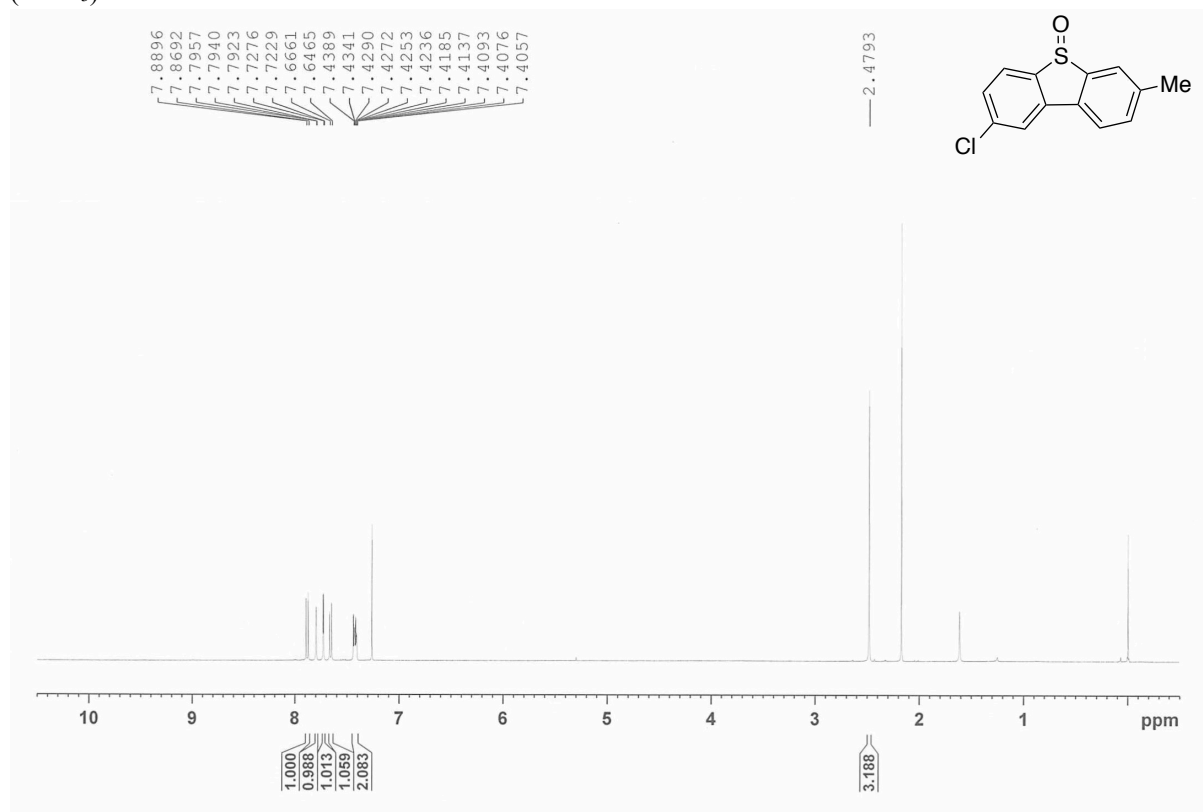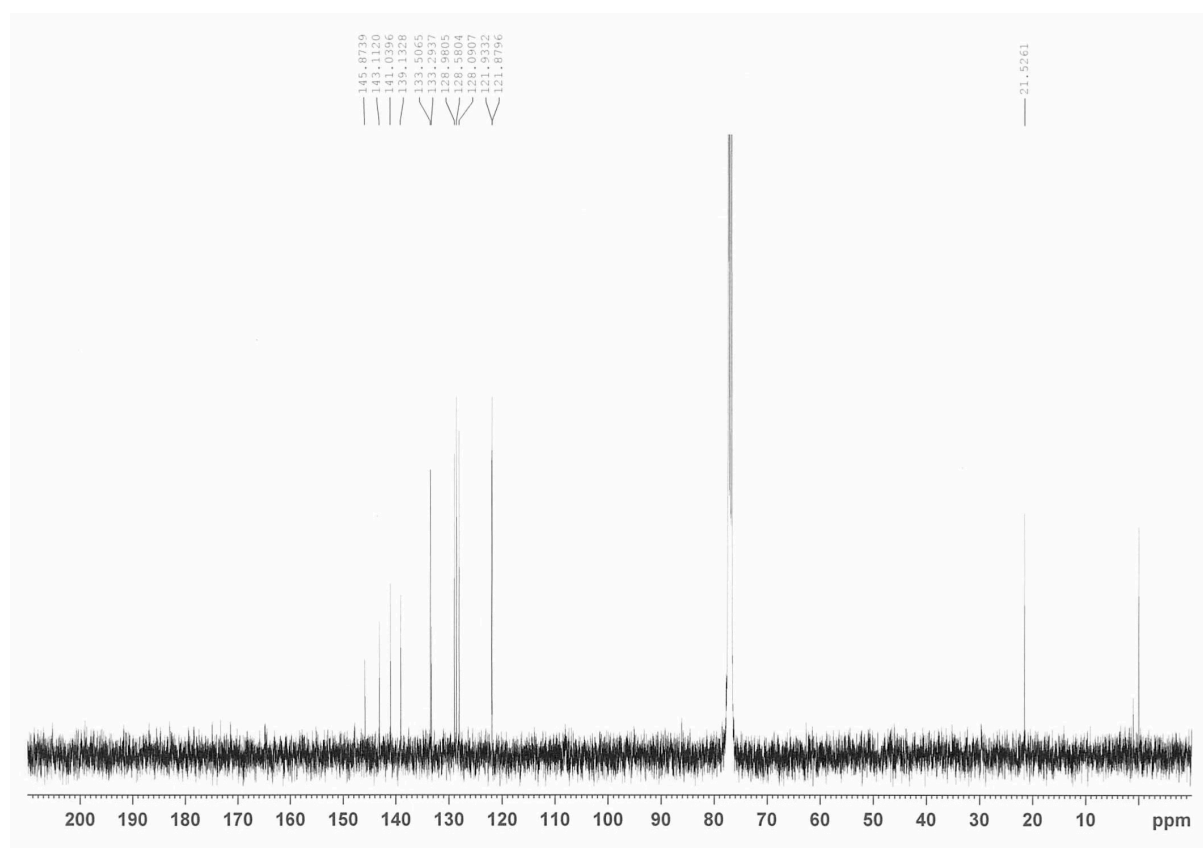



$^1\text{H}$  NMR (400 MHz) and  $^{13}\text{C}$  NMR (101 MHz) spectra of 7-methyl-2-(trifluoromethyl)dibenzo[*b,d*]thiophene 5-oxide (**4p**) ( $\text{CDCl}_3$ )

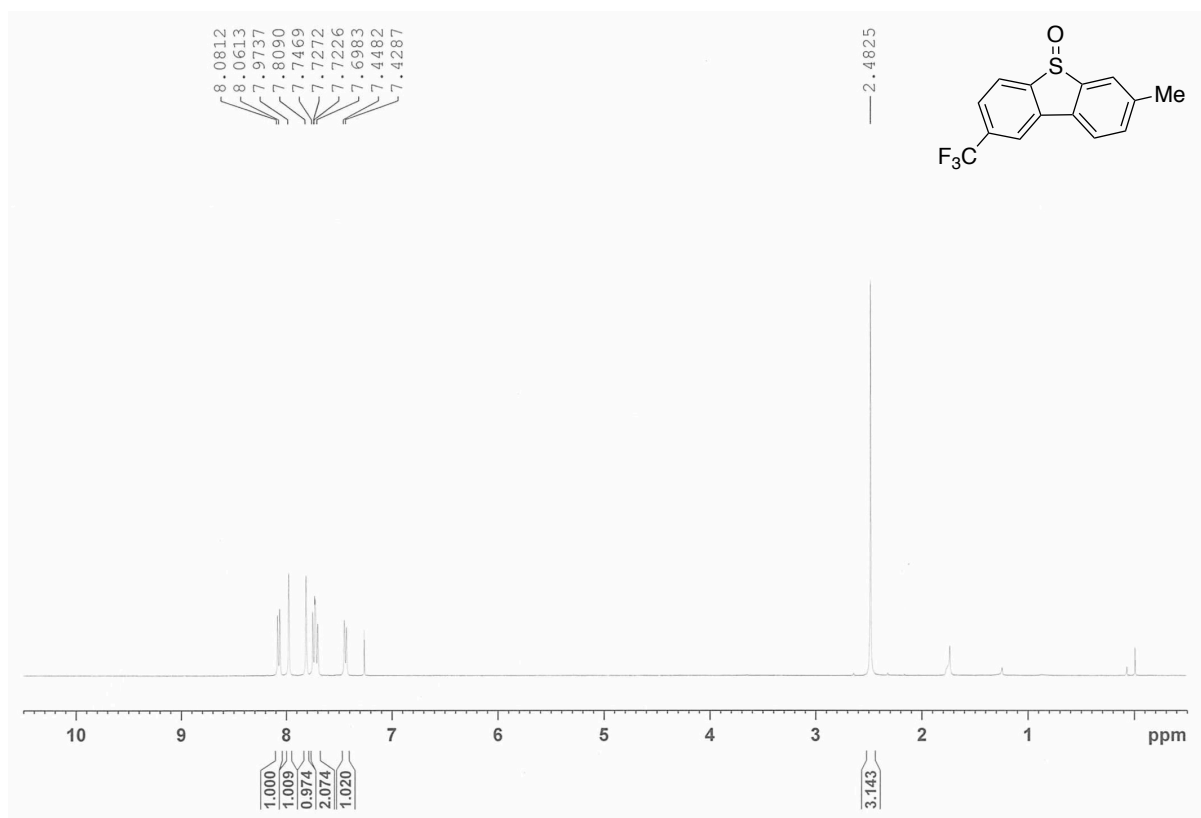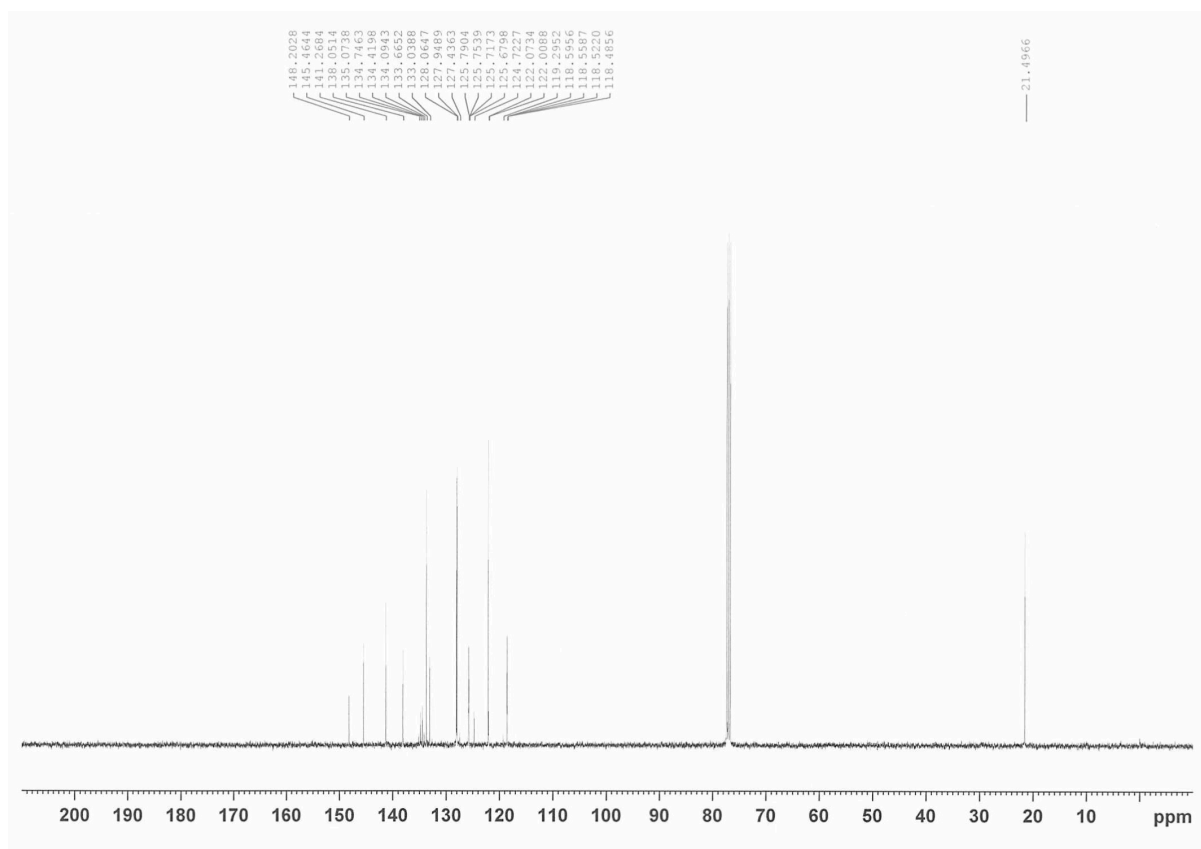

$^1\text{H}$  NMR (400 MHz) and  $^{13}\text{C}$  NMR (101 MHz) spectra of ethyl 7-methyldibenzo[*b,d*]thiophene-2-carboxylate 5-oxide (**4q**) ( $\text{CDCl}_3$ )

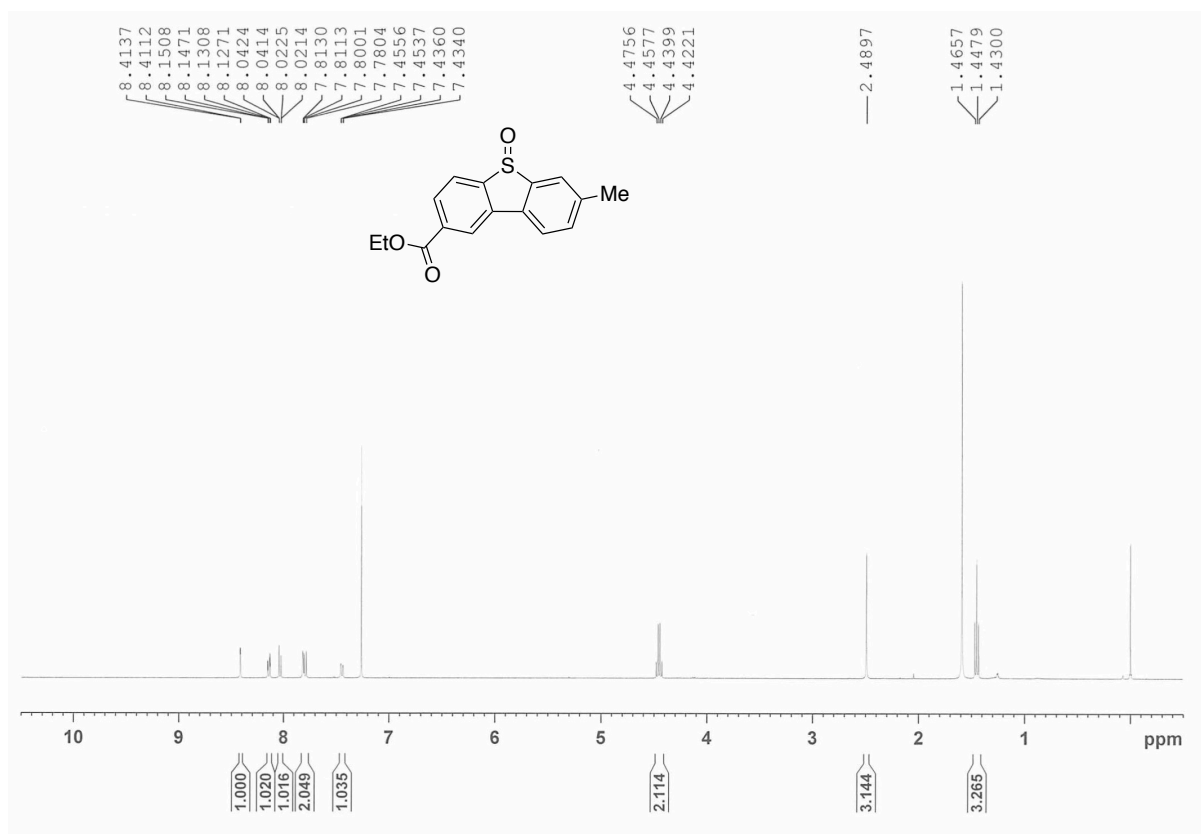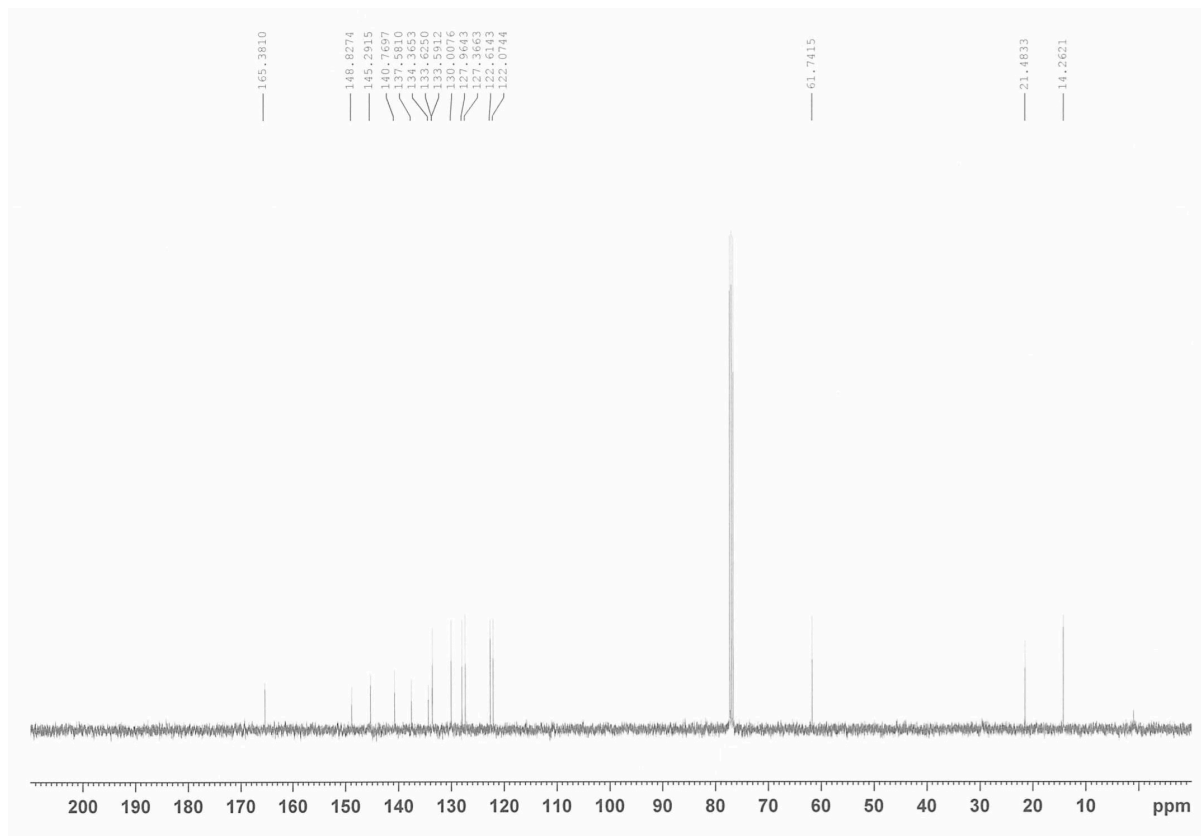

$^1\text{H}$  NMR (400 MHz) and  $^{13}\text{C}$  NMR (101 MHz) spectra of 2-methoxy-5-oxido-3-(trimethylsilyl)dibenzo[*b,d*]thiophen-4-yl trifluoromethanesulfonate (**4r**) ( $\text{CDCl}_3$ )

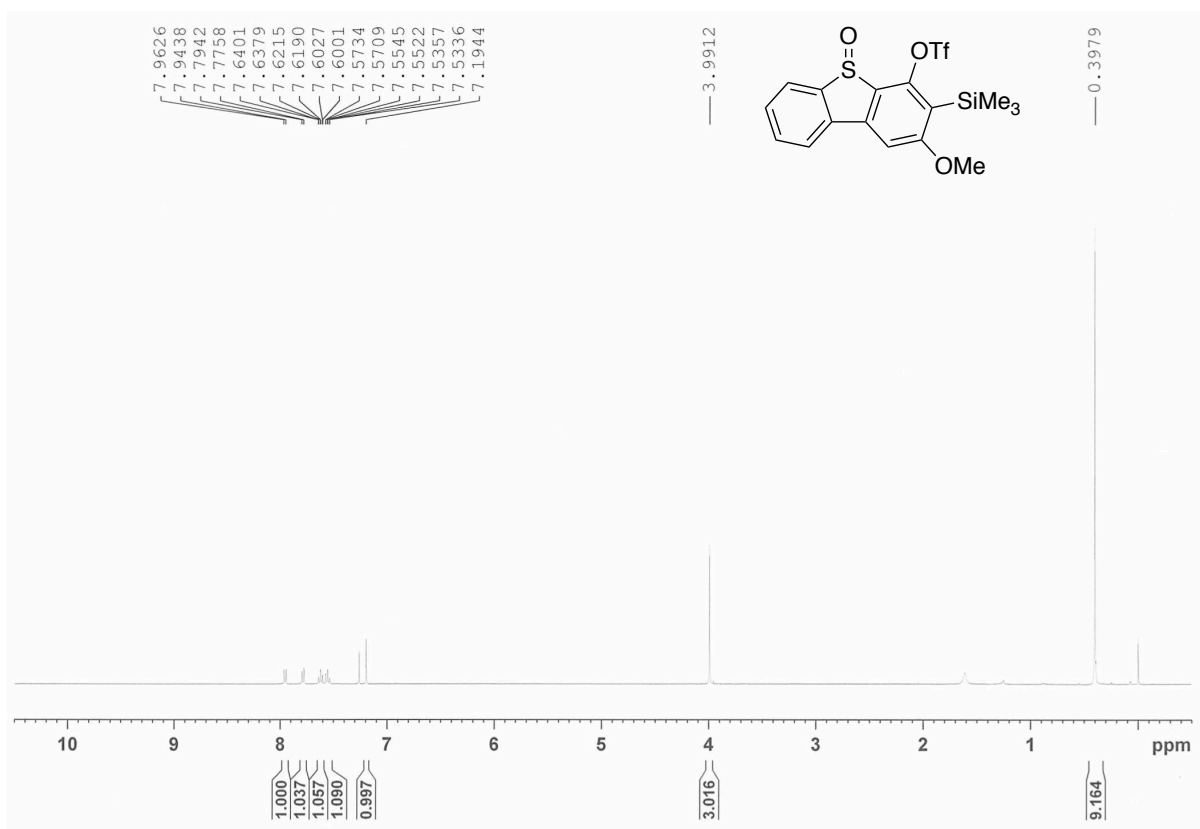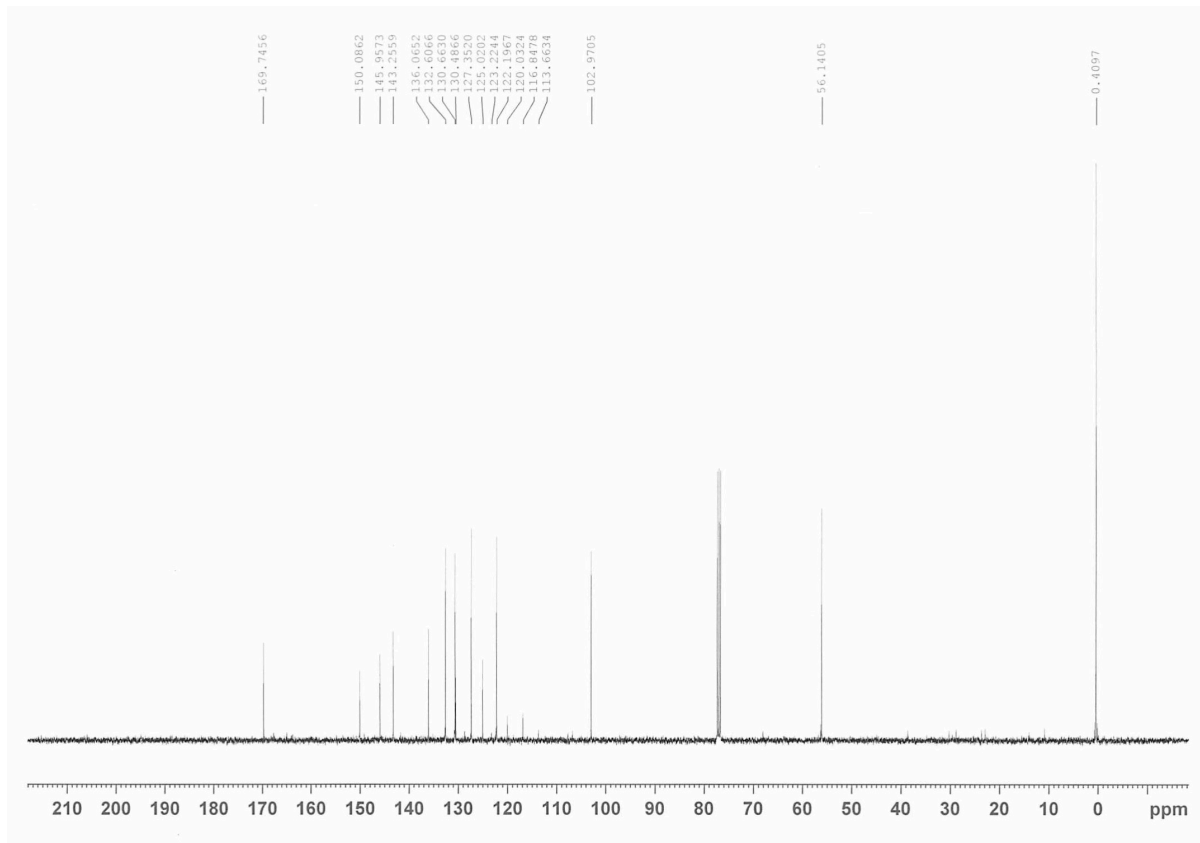

$^1\text{H}$  NMR (400 MHz) and  $^{13}\text{C}$  NMR (101 MHz) spectra of 2-phenylbenzo[*b*]thiophene 1-oxide (**6**) ( $\text{CDCl}_3$ )

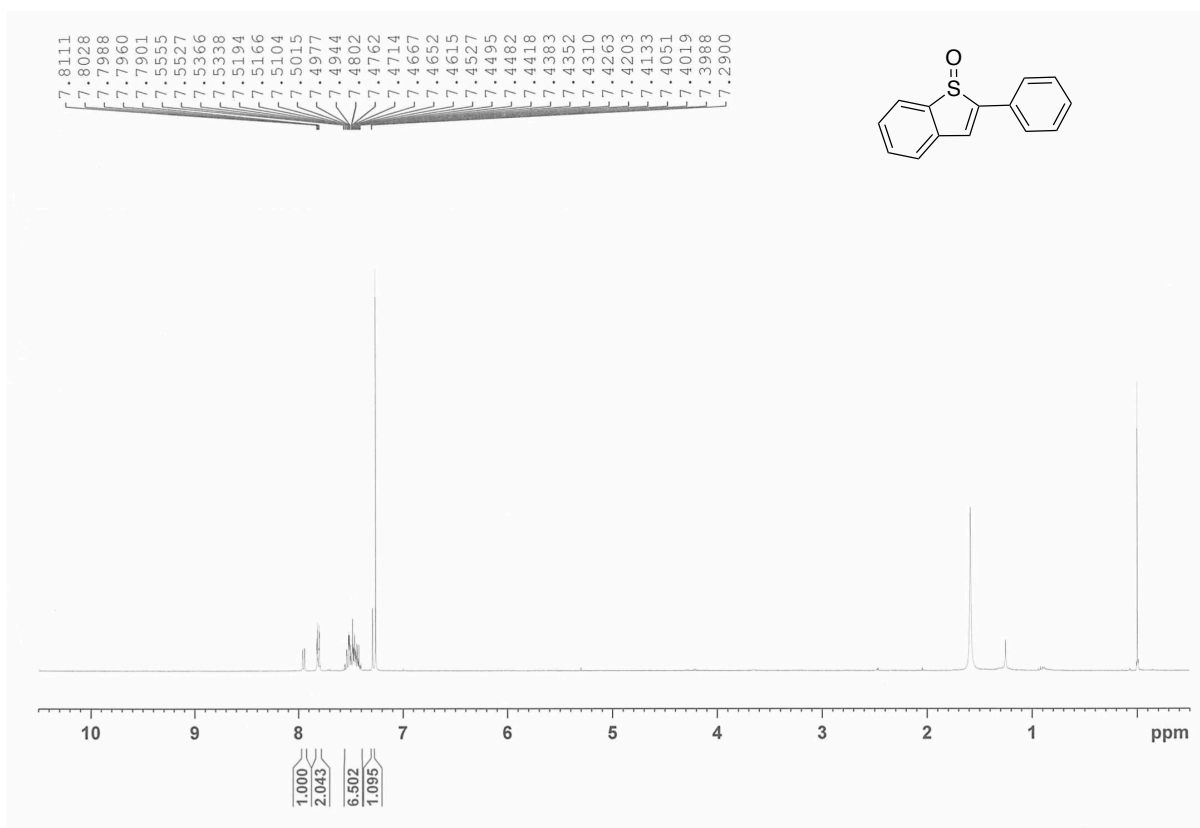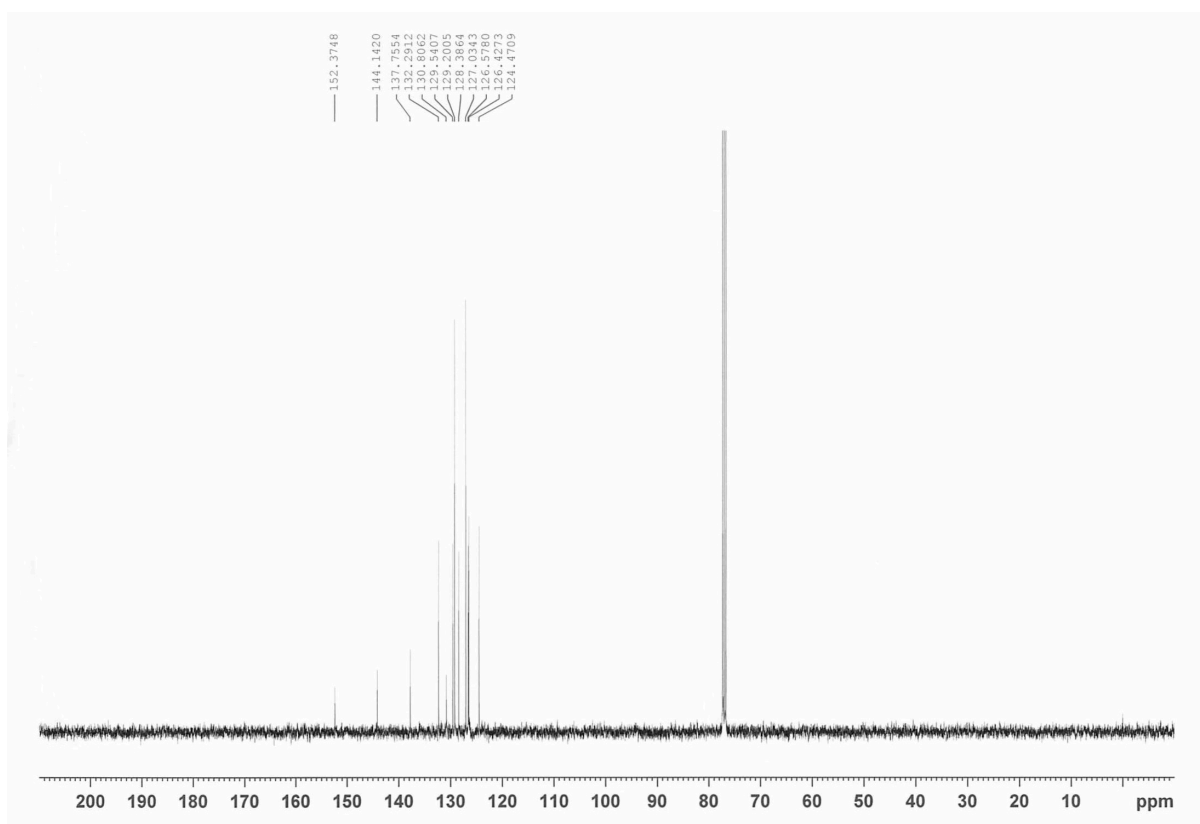

$^1\text{H}$  NMR (400 MHz,  $\text{CDCl}_3$ ) and  $^{13}\text{C}$  NMR (101 MHz,  $\text{CD}_3\text{CN}$ ) spectra of 5-Methoxy-3-methyl-5*H*-5 $\lambda^4$ -dibenzo[*b,d*]thiophen-5-yl trifluoromethanesulfonate (7)

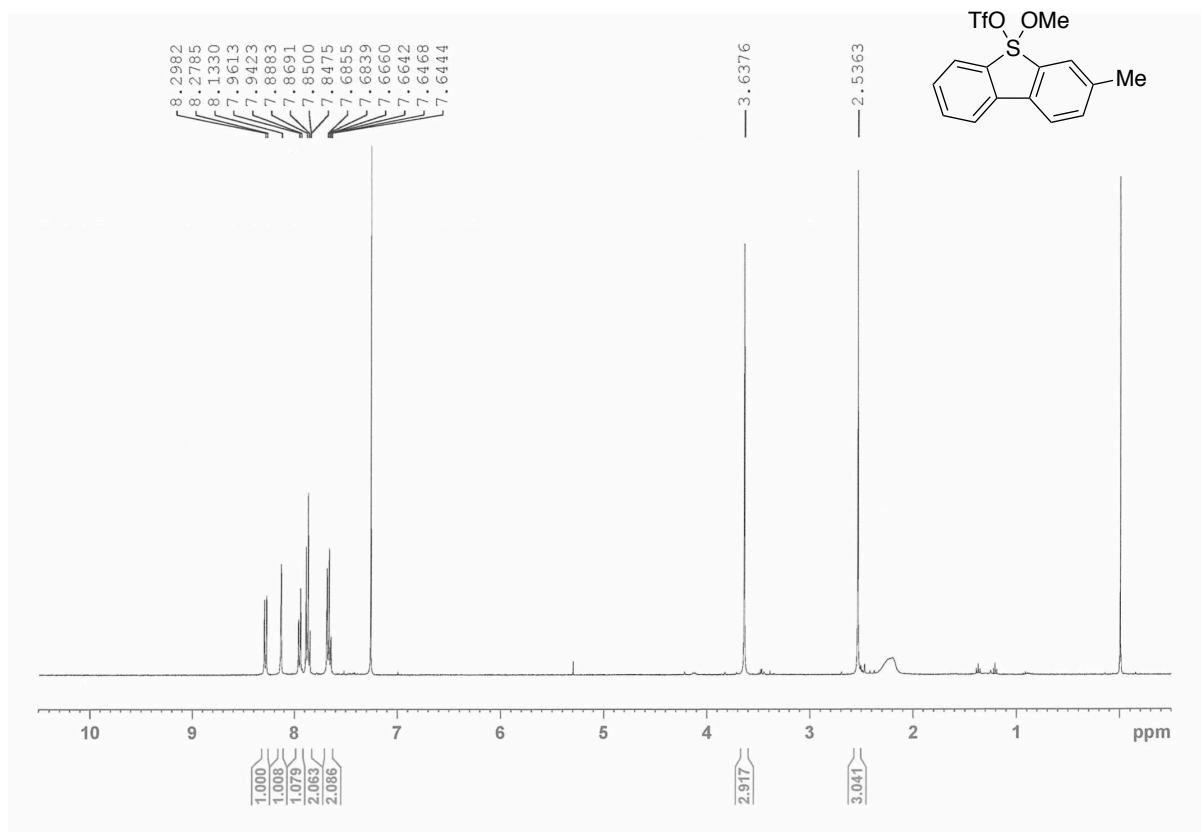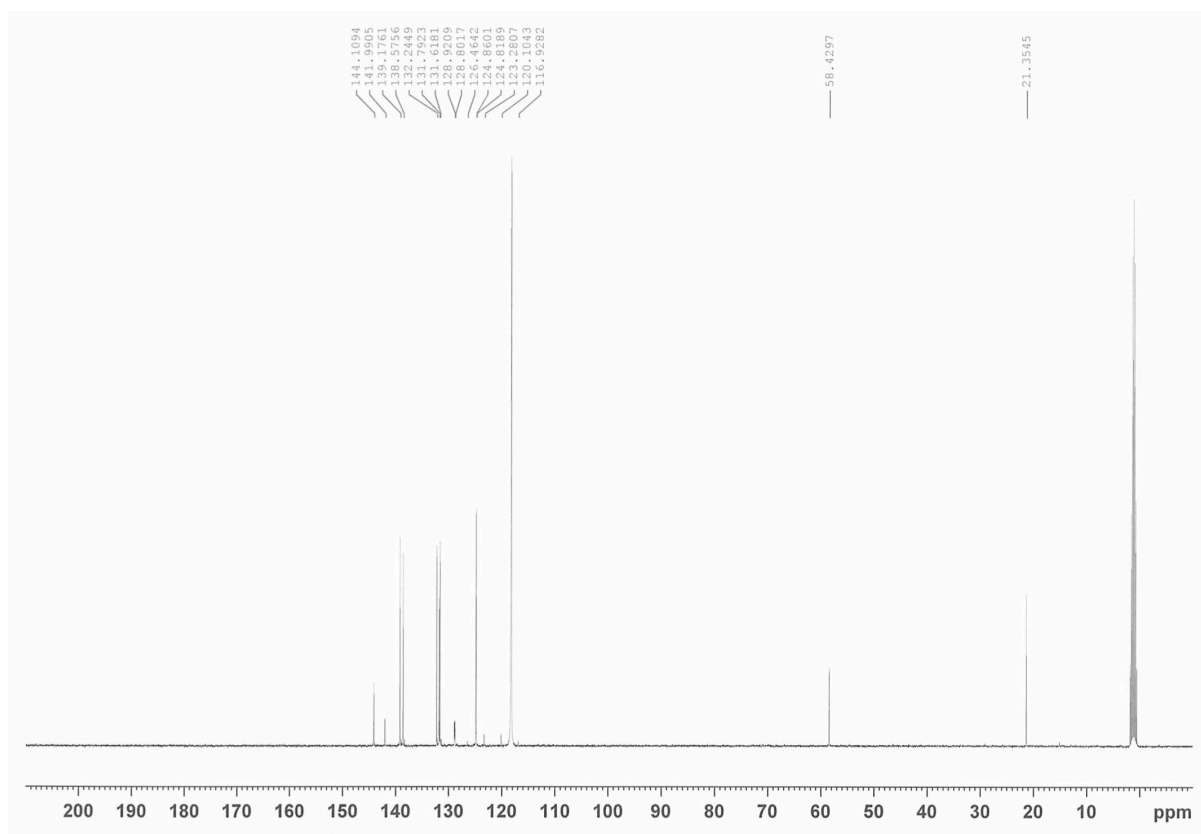

$^1\text{H}$  NMR (400 MHz) and  $^{13}\text{C}$  NMR (101 MHz) spectra of benzo[4,5]thieno[2,3-*b*]furan (**9c**) ( $\text{CDCl}_3$ )

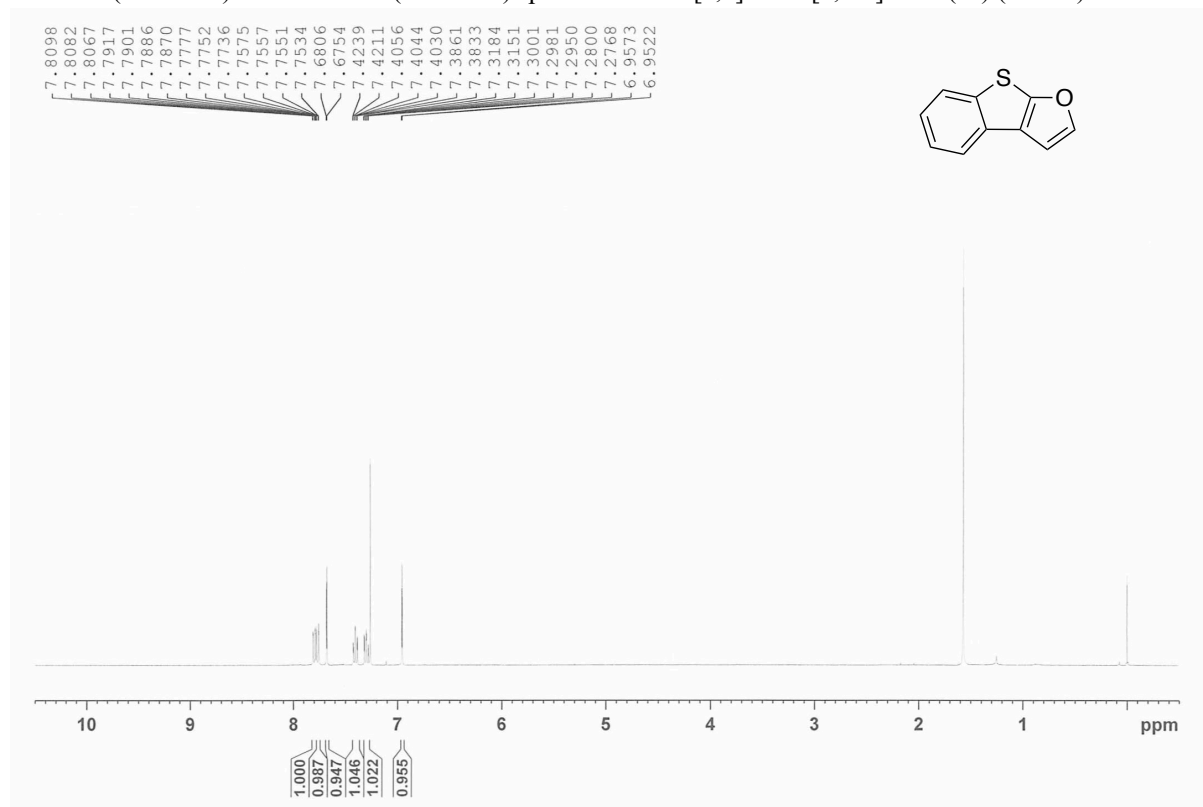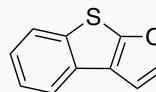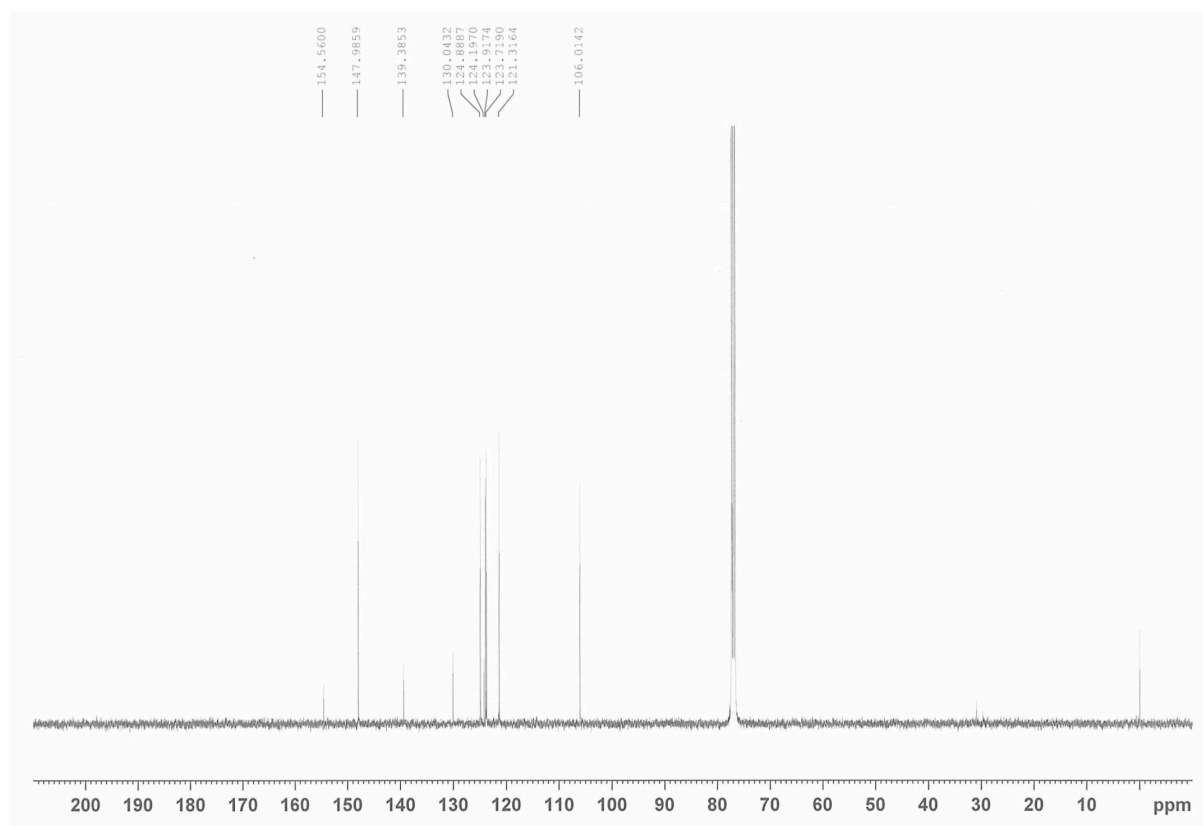

$^1\text{H}$  NMR (400 MHz) and  $^{13}\text{C}$  NMR (101 MHz) spectra of benzo[*b*]thieno[2,3-*d*]thiophene 4,4-dioxide (**10b**) ( $\text{CDCl}_3$ )

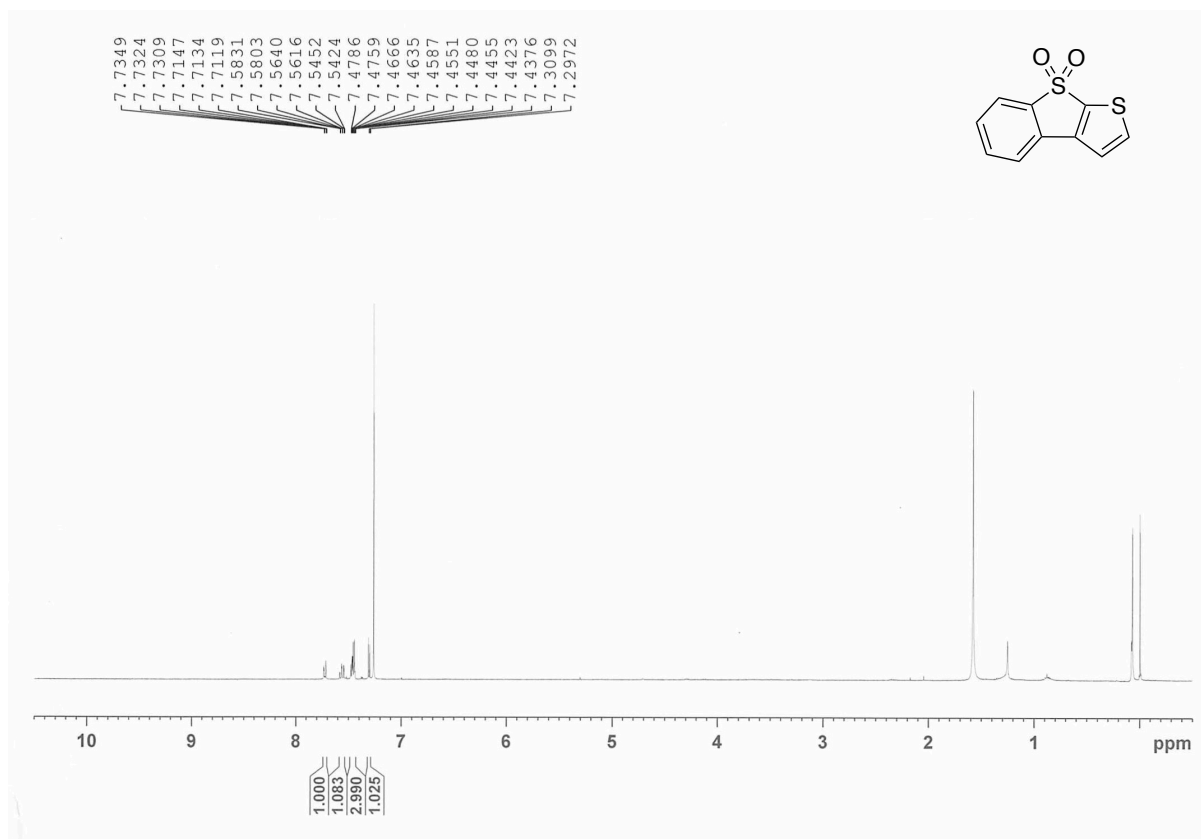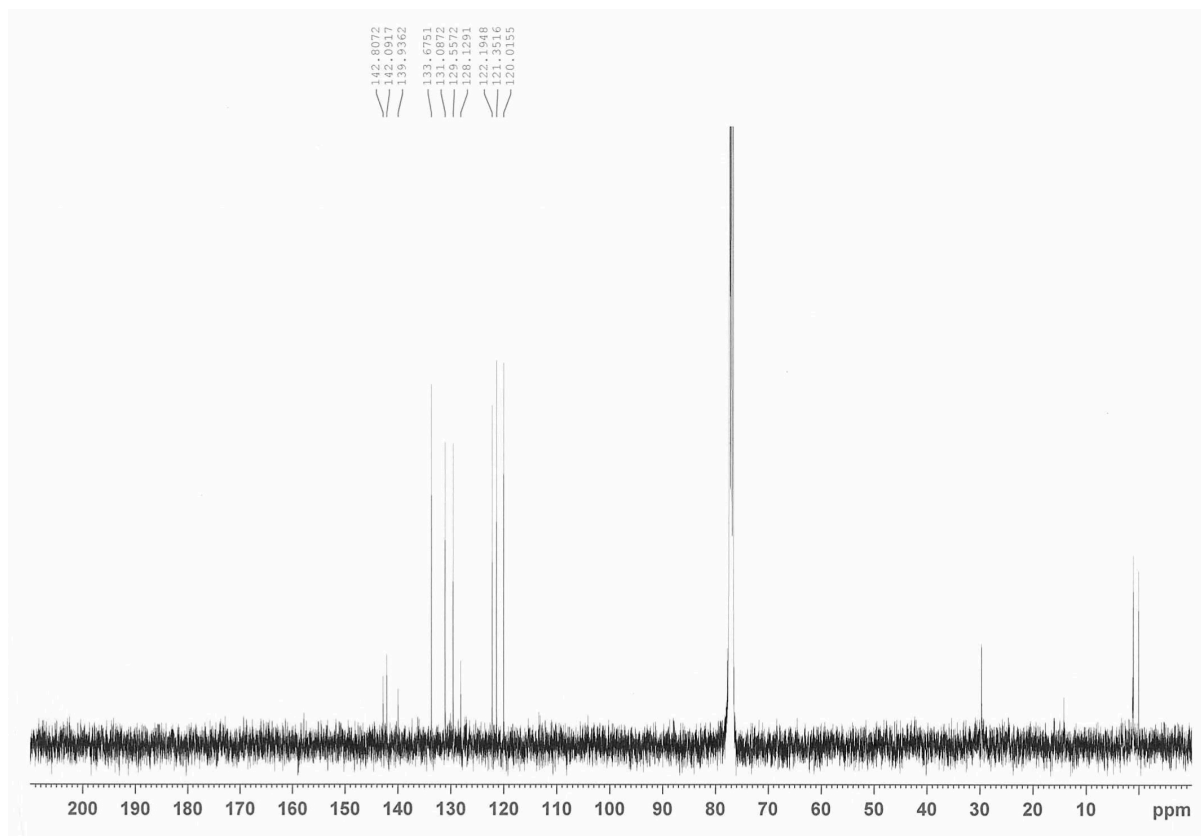

$^1\text{H}$  NMR (400 MHz) and  $^{13}\text{C}$  NMR (101 MHz) spectra of 2,2,2-trifluoro-*N*-(3-methyl-5-oxido-5 $\lambda^4$ -dibenzo[*b,d*]thiophen-5-ylidene)acetamide (**11**) ( $\text{CDCl}_3$ )

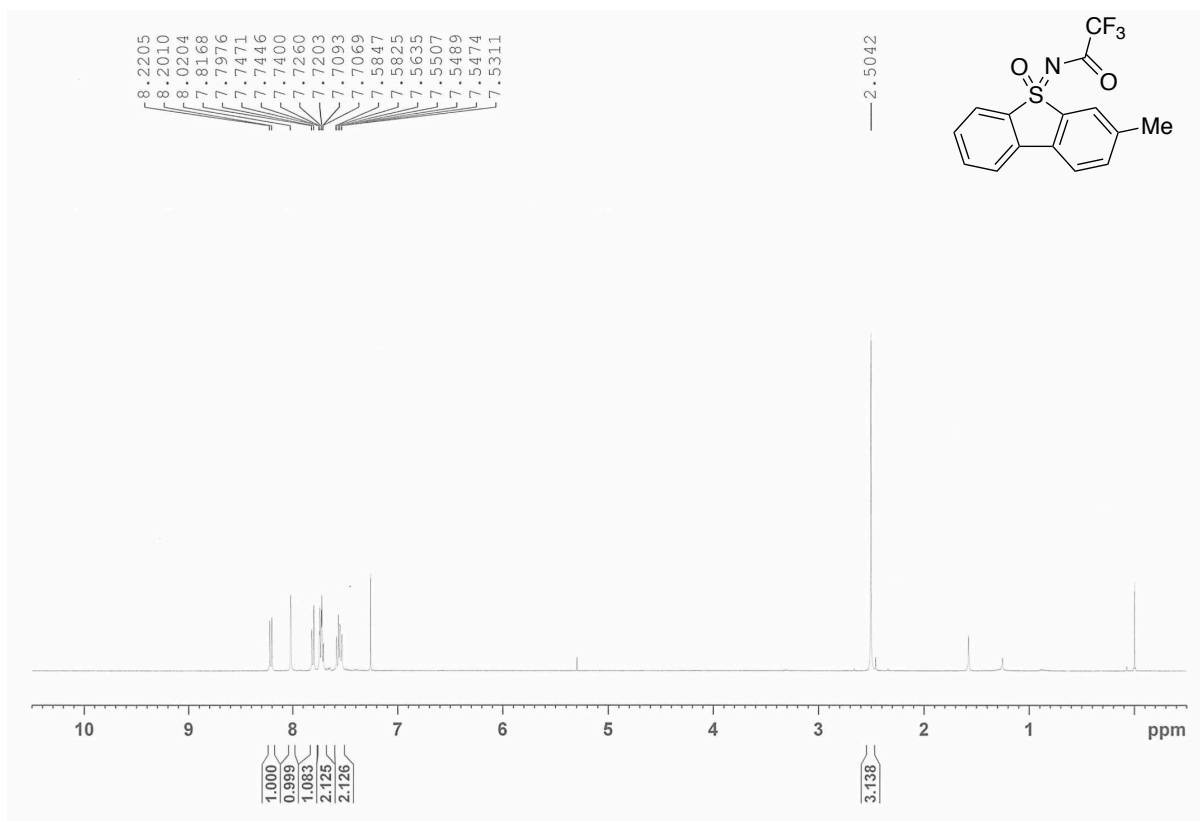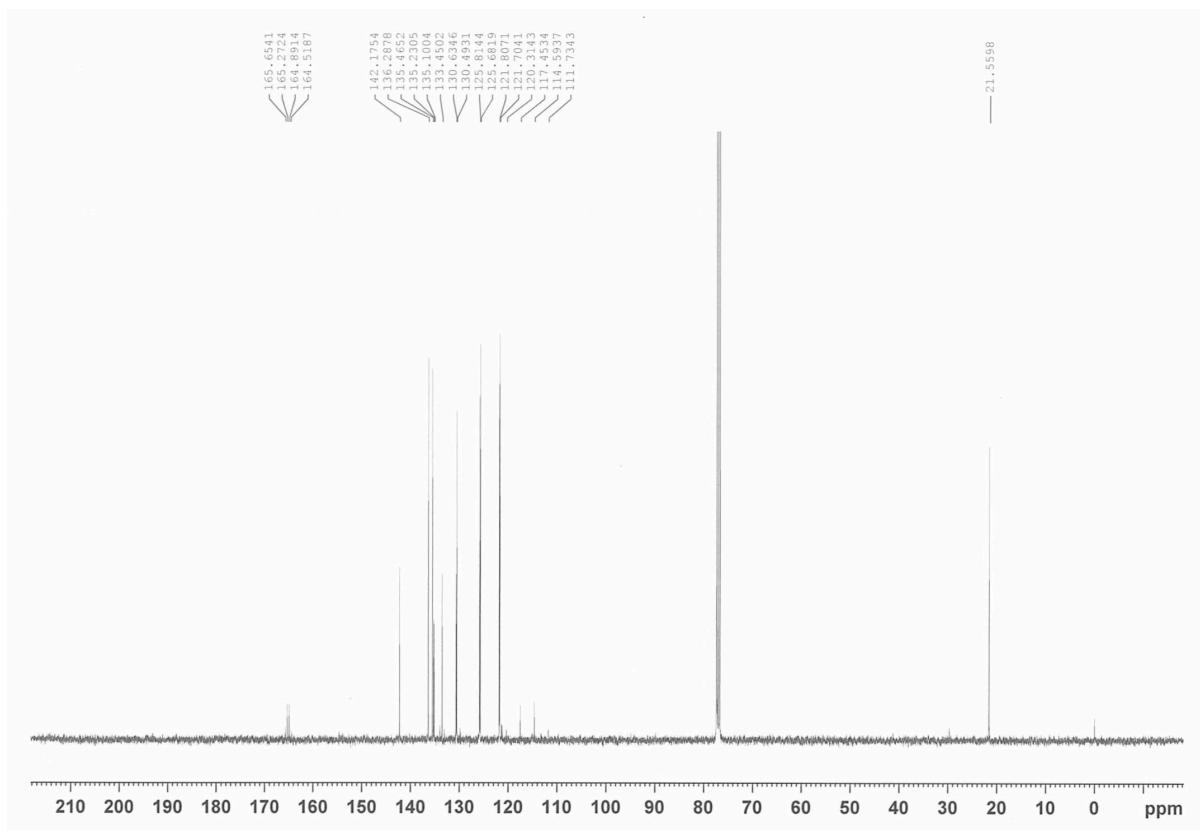



$^1\text{H}$  NMR (400 MHz) and  $^{13}\text{C}$  NMR (101 MHz) spectra of trimethyl(3-(3-methyldibenzo[*b,d*]thiophen-4-yl)prop-1-yn-1-yl)silane (**13**) and trimethyl(3-(7-methyldibenzo[*b,d*]thiophen-4-yl)prop-1-yn-1-yl)silane (**13'**) ( $\text{CDCl}_3$ )

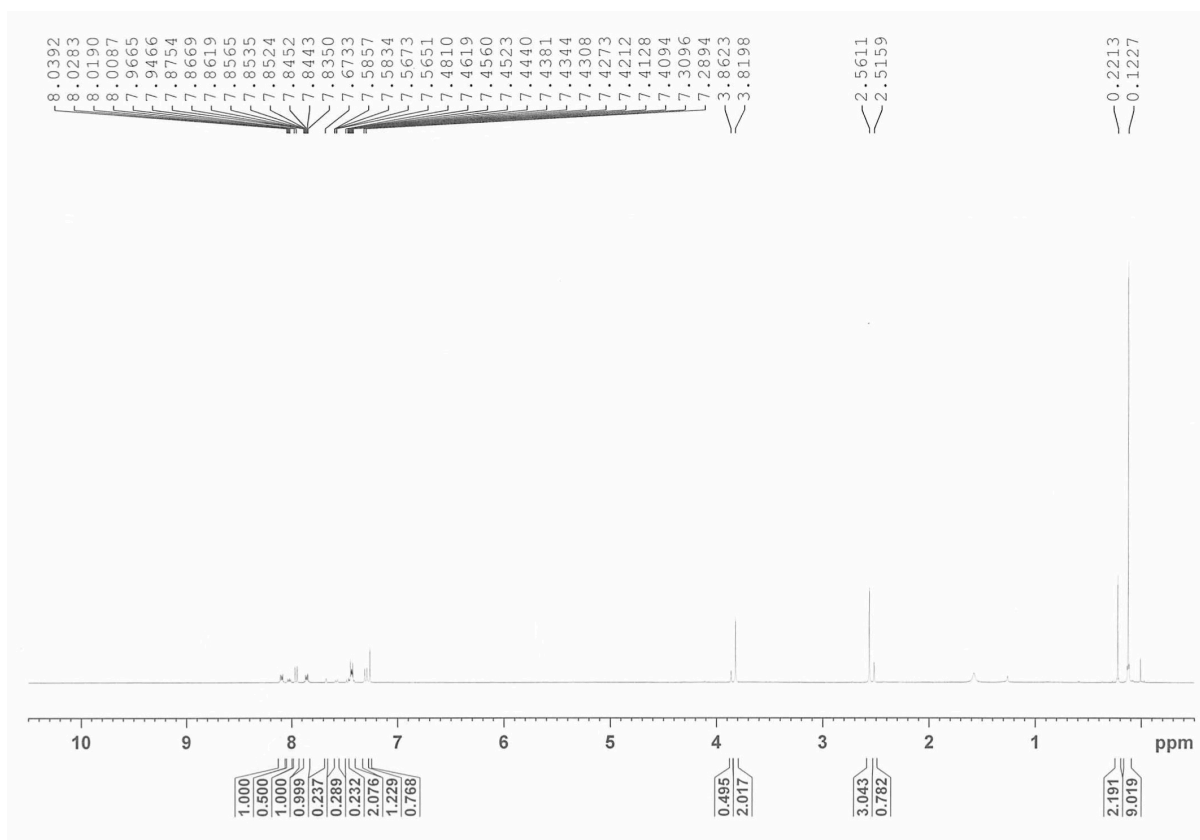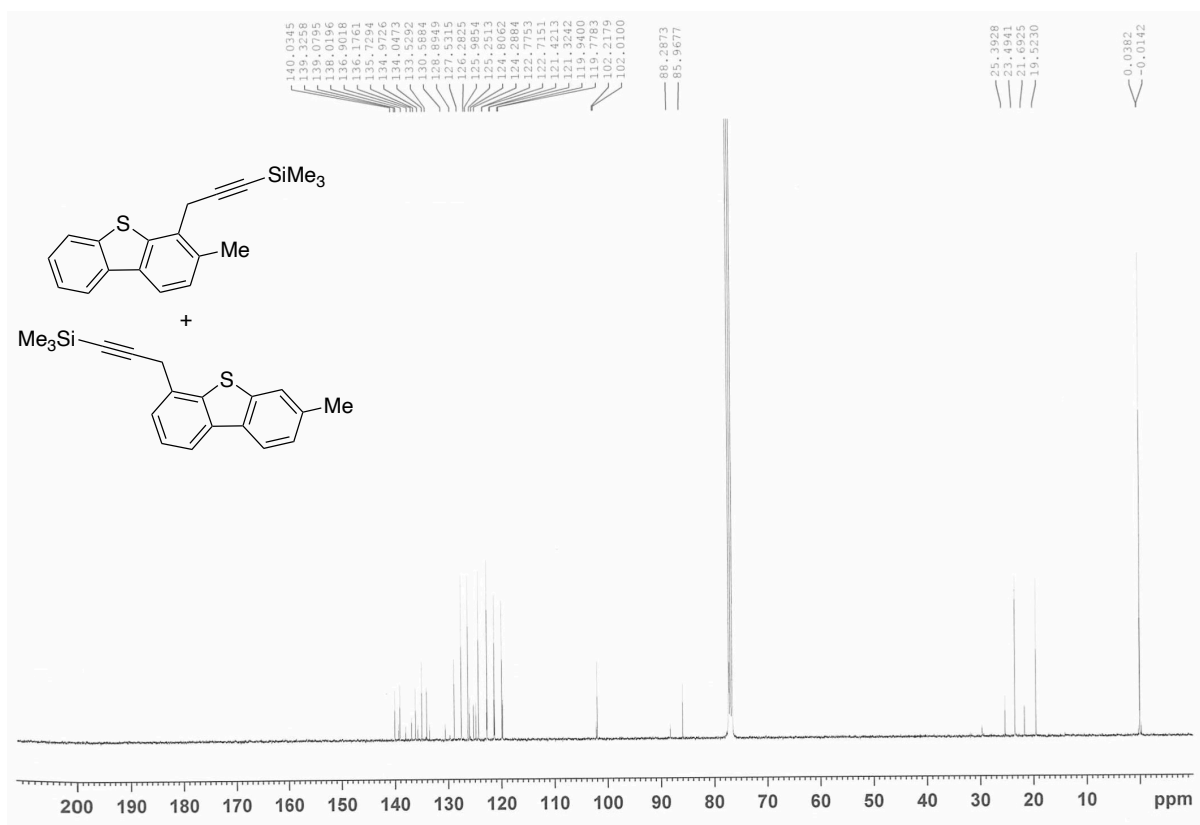

$^1\text{H}$  NMR (400 MHz),  $^{13}\text{C}$  NMR (101 MHz), and NOESY spectra of 2-methoxy-4-(phenylamino)dibenzo[*b,d*]thiophene 5-oxide (**14**) ( $\text{CDCl}_3$ )

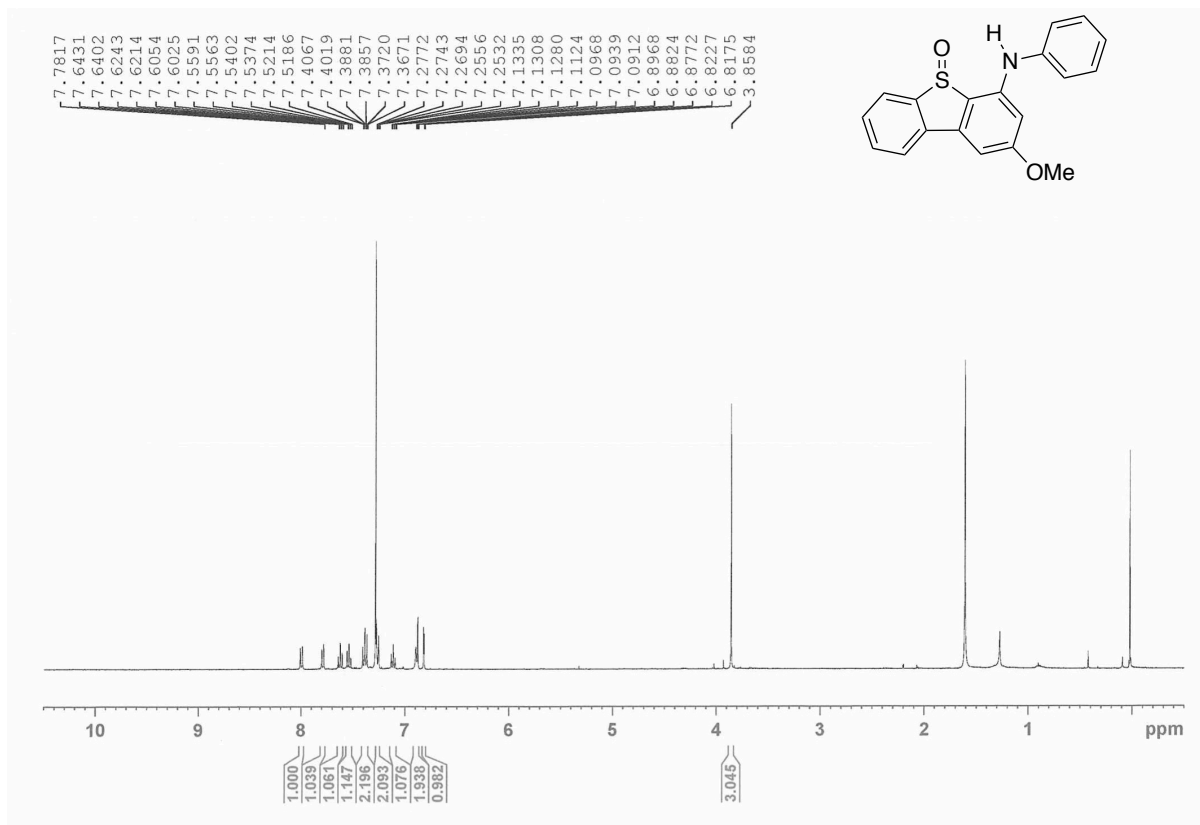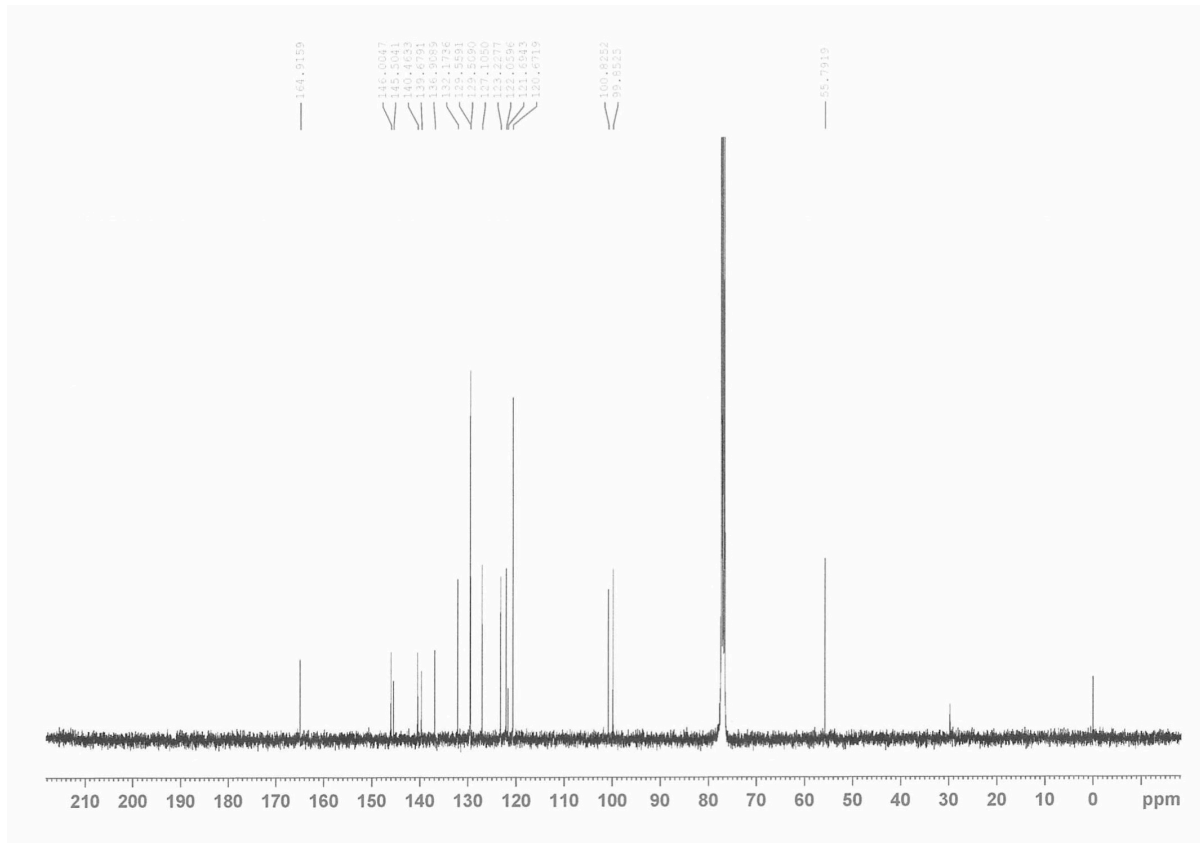

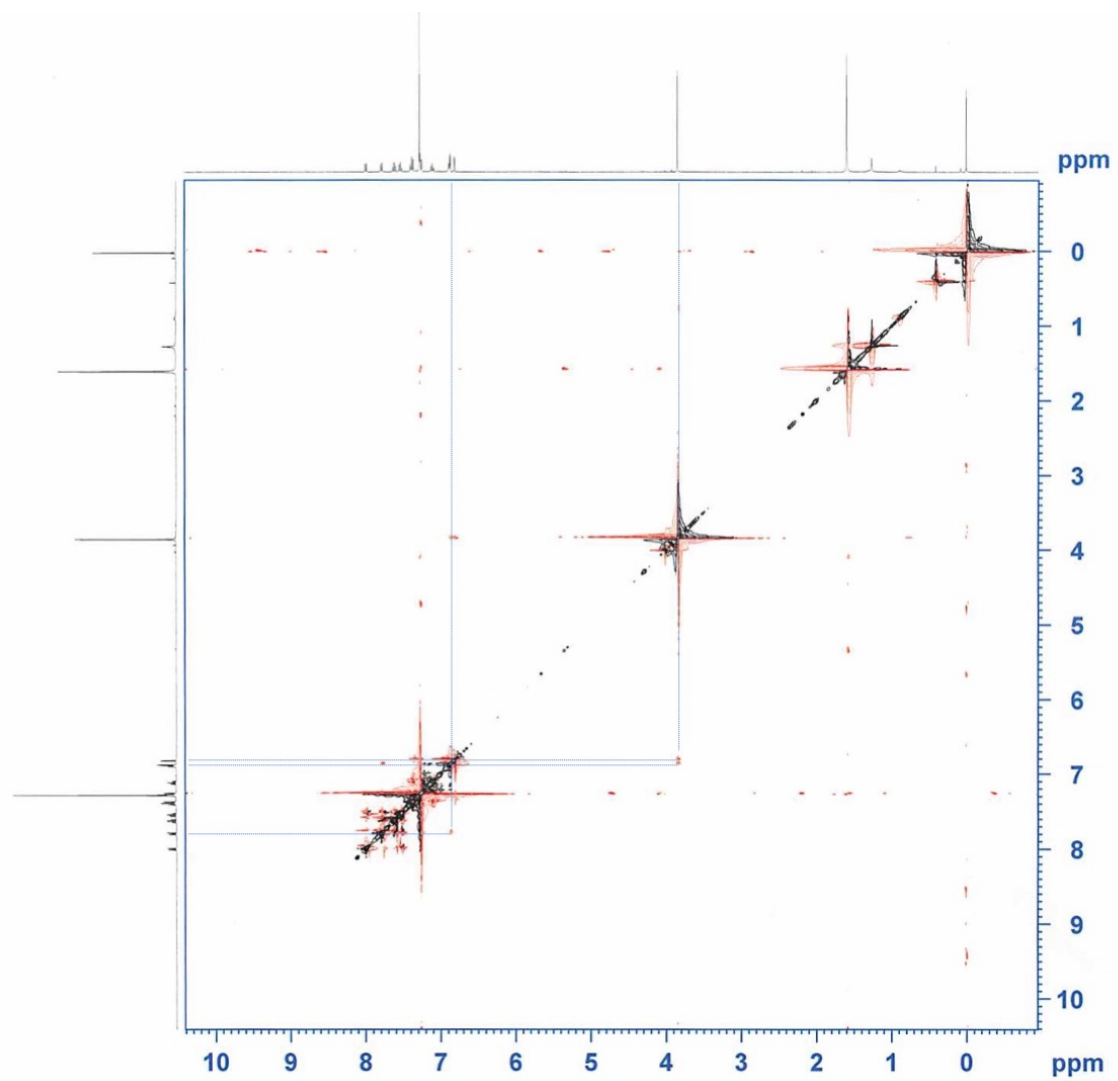

$^1\text{H}$  NMR (400 MHz),  $^{13}\text{C}$  NMR (101 MHz), and NOESY spectra of 1-benzyl-4-methoxy-1*H*-benzo[4',5']thieno[2,3':3,4]benzo[1,2-*d*][1,2,3]triazole 10-oxide (**15**) ( $\text{CDCl}_3$ )

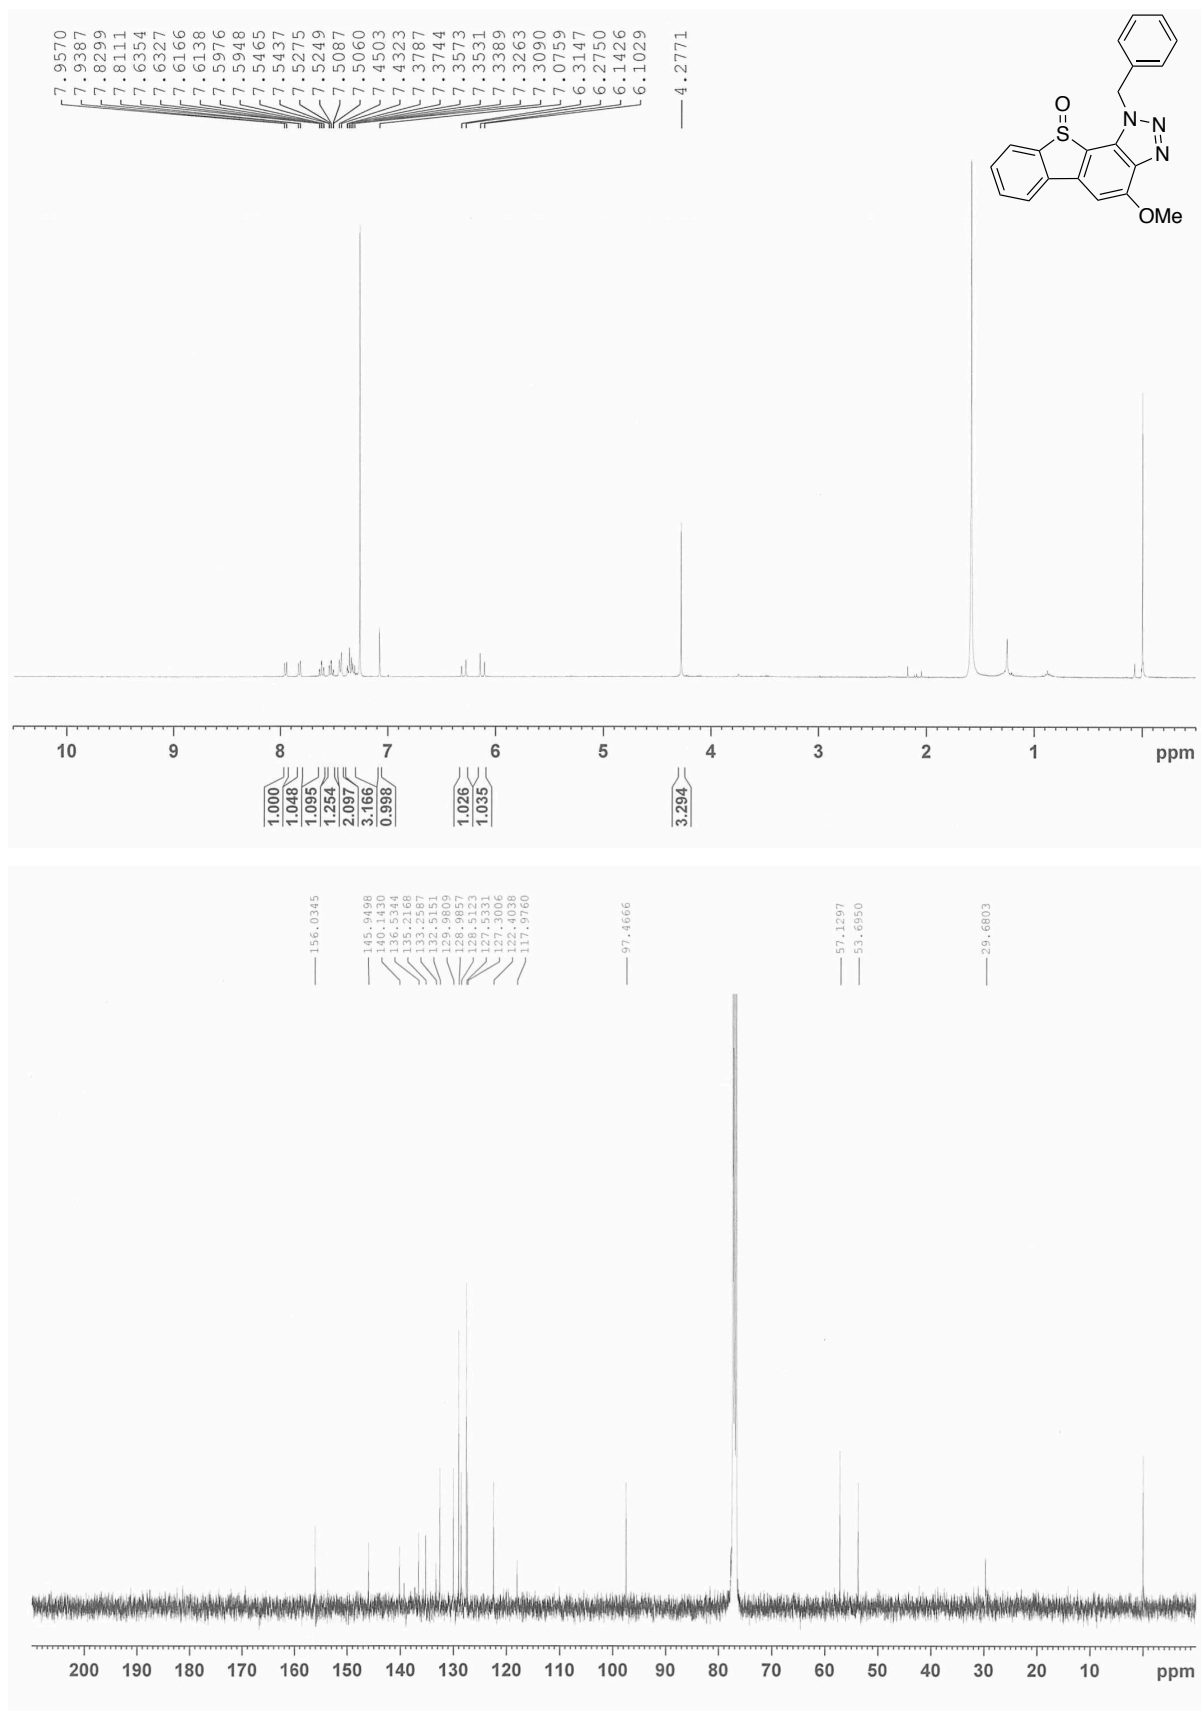

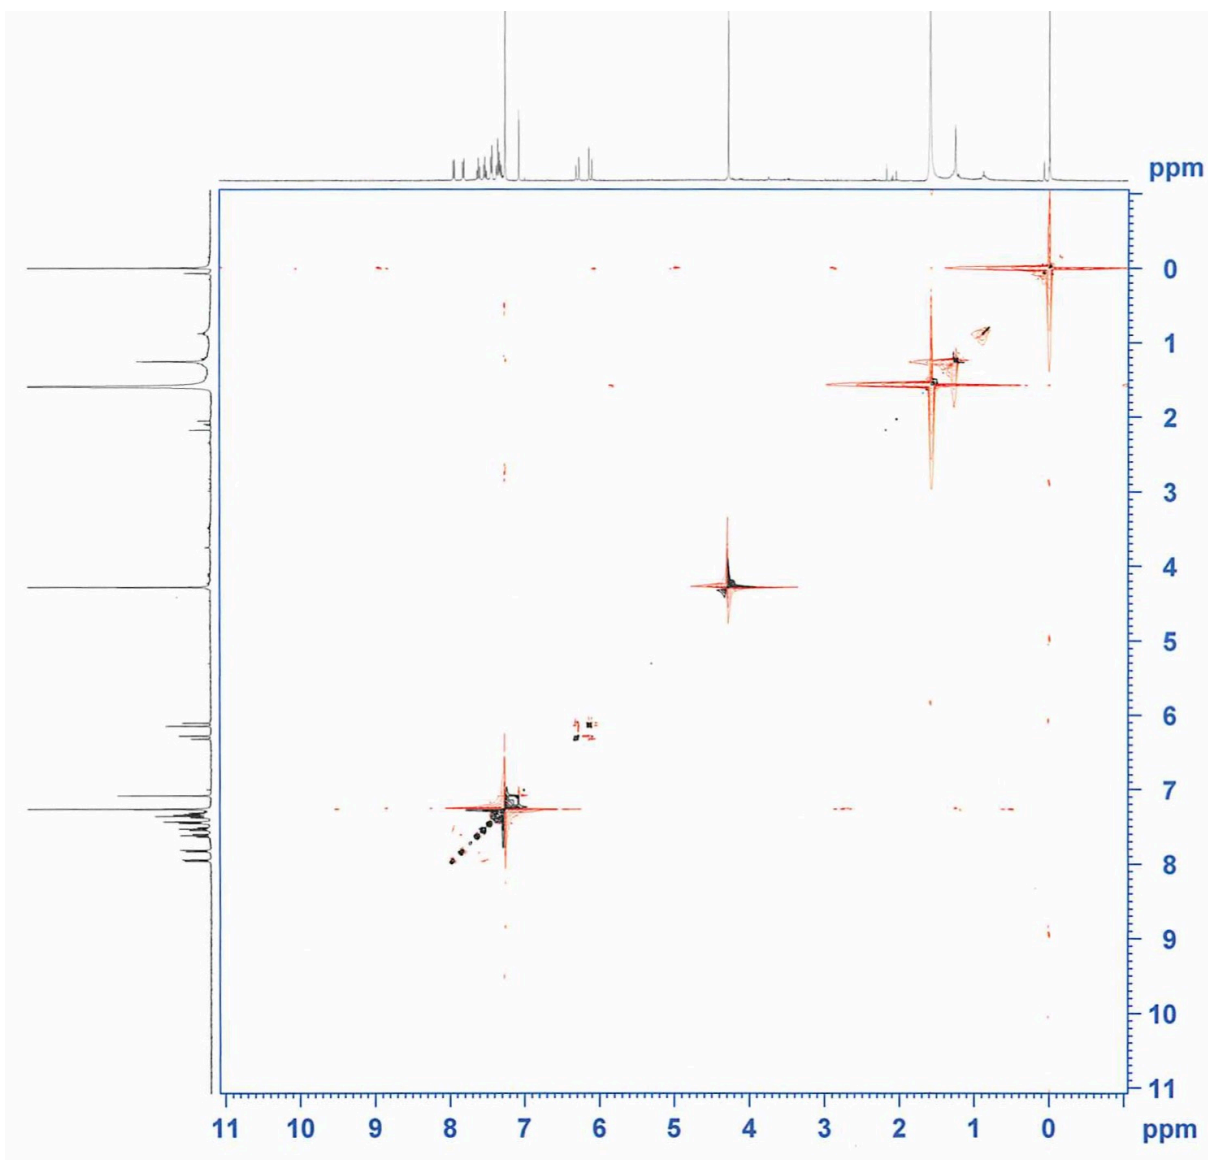

Supplement: d3cc05703h1.pdf [file d3cc05703h1.pdf]
